# Supplementary material for: The assessment and impact of sarcopenia in lung cancer: a systematic literature review
Source: PubMed Central journal article supplement — BMJ Open. 2014 Jan 2;4(1):e003697. doi: 10.1136/bmjopen-2013-003697 (PMC3902311; doi:10.1136/bmjopen-2013-003697), 2014-01-02
Supplement: bmjopen-2013-003697.draft_revisions.pdf [file bmjopen-2013-003697.draft_revisions.pdf]

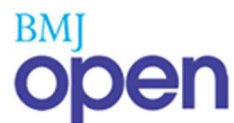

**The assessment and impact of sarcopenia in lung cancer: a systematic review**

|                                 |                                                                                                                                                                                                                                                                                                                                           |
|---------------------------------|-------------------------------------------------------------------------------------------------------------------------------------------------------------------------------------------------------------------------------------------------------------------------------------------------------------------------------------------|
| Journal:                        | <i>BMJ Open</i>                                                                                                                                                                                                                                                                                                                           |
| Manuscript ID:                  | bmjopen-2013-003697                                                                                                                                                                                                                                                                                                                       |
| Article Type:                   | Research                                                                                                                                                                                                                                                                                                                                  |
| Date Submitted by the Author:   | 01-Aug-2013                                                                                                                                                                                                                                                                                                                               |
| Complete List of Authors:       | Collins, Jemima; University Hospital of Wales, General Medicine<br>Noble, Simon; Cardiff University, Palliative Medicine<br>Chester, John; Cardiff University, Medical Oncology<br>Coles, Bernadette; Velindre NHS Trust, Cancer Research Wales Library<br>Byrne, Anthony; Cardiff University, Marie Curie Palliative Care Research Group |
| <b>Primary Subject Heading</b>: | Oncology                                                                                                                                                                                                                                                                                                                                  |
| Secondary Subject Heading:      | Palliative care                                                                                                                                                                                                                                                                                                                           |
| Keywords:                       | Thoracic medicine < INTERNAL MEDICINE, Respiratory tract tumours < ONCOLOGY, Adult palliative care < PALLIATIVE CARE                                                                                                                                                                                                                      |
|                                 |                                                                                                                                                                                                                                                                                                                                           |

SCHOLARONE™  
Manuscripts

**The assessment and impact of sarcopenia in lung cancer: a systematic literature review, highlighting implications for research and clinical practice.**

Jemima Collins, MB ChB MRCP, Clinical Research Fellow, Cardiff and Vale University Health Board

Simon Noble, MBBS MD FRCP, Reader in Palliative Medicine, Cardiff University

John Chester, BA PhD MB BS FRCP, Professor of Medical Oncology, Cardiff University

Bernadette Coles, Senior Librarian, Cancer Research Wales Library, Velindre NHS Trust

Anthony Byrne, MB ChB FRCP, Director, Marie Curie Palliative Care Research Group, Cardiff University

**Abstract**

**Objectives**

There is growing awareness of the relationship between sarcopenia (loss of muscle mass), and outcomes in lung cancer, making it a potential target for future therapies. In order to inform future lung cancer research, we undertook a systematic review of factors associated with loss of muscle mass, and the relationship between muscle function and muscle mass.

### Design

We conducted a computerised systematic literature search on five databases. Studies were included if they explored muscle mass as an outcome measure in lung cancer patients, and were published in English.

### Setting

Secondary care

### Participants

Patients with lung cancer.

### Primary outcome

Muscle mass values associated with or without muscle strength or physical performance. We recorded the units and methods of measuring muscle mass, and the comparison or correlation that was assessed.

### Results

We reviewed 5226 citations, and from these 29 papers were selected for analysis. Sarcopenia, as defined by reduced muscle mass alone, was found to be very prevalent in lung cancer patients, regardless of body mass index, and where present was associated with poorer functional status and overall survival.

1  
2  
3  
4  
5  
6  
7  
8  
9  
10  
11  
12  
13  
14  
15  
16  
17  
18  
19  
20  
21  
22  
23  
24  
25  
26  
27  
28  
29  
30  
31  
32  
33  
34  
35  
36  
37  
38  
39  
40  
41  
42  
43  
44  
45  
46  
47  
48  
49

There were diverse studies exploring molecular and metabolic factors in the development of loss of muscle mass, however the precise mechanisms that contribute to sarcopenia and cachexia remain uncertain. The effect of nutritional supplements and adenosine triphosphate infusions on muscle mass showed conflicting results. There is very limited data on the correlation between degree of sarcopenia and muscle function, which has a non-linear relationship in older non-cancer populations.

Conclusion

Loss of muscle mass is a significant contributor to morbidity in lung cancer patients. Loss of muscle mass and function may pre-date clinically overt cachexia, underlining the importance of evaluating sarcopenia, rather than weight loss alone. Understanding this relationship and its associated factors will provide opportunities for focused intervention to improve clinical outcomes.

Keywords

Sarcopenia; cachexia; muscle mass; physical performance; lung cancer

Article Summary

**Article Focus**

- Sarcopenia, the loss of muscle mass and muscle function, is a significant contributor to morbidity in lung cancer patients.
- Sarcopenia is a key component of a new definition of cancer cachexia, however its relationship to cachexia in the lung cancer literature is poorly defined.

#### Key messages

- Sarcopenia is prevalent in lung cancer patients regardless of body mass index and body weight, and where present is associated with poorer functional status and overall survival.
- There is very limited data on the correlation between the degree of loss of muscle mass and muscle function, which has a non-linear relationship in older non-cancer populations.
- The heterogeneity of cut-off values for cancer-related sarcopenia necessitates a standardised definition which can be used clinically and in the research setting, to harmonise reporting and allow for direct comparison of results as well as meta-analysis of data

#### Strengths and limitations of this study

- Timely systematic review considering the increasingly recognised phenomenon of sarcopenia, as it relates to cachexia, which affects not only patients with lung cancer, but also the wider cancer population
- Limited to publications in English only

## Introduction

There are 42,000 cases of lung cancer diagnosed in the United Kingdom each year and approximately three quarters are over the age of 65 at diagnosis. Despite advances in anticancer therapies, survival benefits in lung cancer patients over the past thirty years have been relatively small compared to those seen in breast, colorectal and prostate cancers [1]. Whilst reasons for this are complex, many lung cancer patients are ineligible for radical treatment at presentation due to poor performance status or co-morbidity, while others fail to receive their intended treatment plan because of functional decline [2, 3].

Sarcopenia is a widely recognised phenomenon that has important clinical implications in the management of lung cancer. It is characterised by a triad of progressive loss of skeletal muscle mass, muscle strength and physical performance [4]. It was originally described in the elderly non-cancer population, and is often now defined as a geriatric syndrome associated with functional impairment, increased risk of falls, fractures and reduced survival [4-7]. However, sarcopenia may also be seen in younger patients in association with muscle disuse, malnutrition or inflammatory diseases, including cancer [4].

1  
2  
3  
4  
5  
6  
7  
8  
9  
10  
11  
12  
13  
14  
15  
16  
17  
18  
19  
20  
21  
22  
23  
24  
25  
26  
27  
28  
29  
30  
31  
32  
33  
34  
35  
36  
37  
38  
39  
40  
41  
42  
43  
44  
45  
46  
47  
48  
49

Central to the concept of sarcopenia is the recognition that overall neuromuscular function, rather than muscle mass alone, is essential for maintenance of independence. Although originally defined as an appendicular skeletal muscle mass index of more than two standard deviations below the sex-specific mean of healthy adults (i.e. 5.45kg/m<sup>2</sup> for women and 7.26 kg/m<sup>2</sup> for men) [6] the current consensus on defining sarcopenia requires assessment of muscle strength, or performance, as well as mass [8]. Loss of muscle mass is usually gradual and not necessarily associated with significant or sudden weight loss, and the relationship between muscle mass and strength is non-linear [9, 10].

Loss of muscle mass, with or without loss of fat mass, is also a predominant component of weight loss seen in cancer cachexia, a complex metabolic syndrome with inflammation recognised as a key feature [11]. The pathophysiological mechanisms responsible for loss of muscle mass in cancer cachexia differ, at least in part, from those in sarcopenia of ageing. Therefore, in established cachexia, most patients will have sarcopenia, whereas sarcopenic patients are often not cachectic.

Over the last decade, there has been increasing recognition of the importance of sarcopenia as part of the cancer cachexia syndrome and its impact has been evaluated in patients with lung, breast, upper gastrointestinal, hepatocellular and colorectal malignancies [12-16]. Non-small cell lung cancer (NSCLC) has a particularly strong association with loss of muscle mass - of 441 patients consecutively referred to a regional oncology service, 46.7% were defined as sarcopenic, based on muscle mass measurements [17]. As with the elderly non-cancer patient, sarcopenia in cancer has important clinical

1  
2  
3  
4  
5 implications. Most notably it is associated with poor performance status and reduced survival [12]. It also appears to be associated with an increase in  
6  
7 chemotherapy-related toxicities [13, 15].  
8  
9

10  
11  
12  
13 In the context of lung cancer, cachexia and sarcopenia frequently coexist and may be clinically indistinguishable. However, having clear working  
14 definitions may allow earlier recognition of the conditions and provide a framework for research to identify early markers and focused interventions,  
15 offering complementary therapeutic approaches. It is also important to consider that, although lung cancer cachexia may lead to sarcopenia, sarcopenia  
16 may itself pre-date cachexia. Failure to recognise this may lead to lost opportunities to limit and treat sarcopenia in the NSCLC patient, and thereby better  
17 preserve performance status. This could impact on survival for patients, through reduced eligibility for active treatments and reduced ability to tolerate  
18 chemotherapy toxicities [2, 12]. In the previously-mentioned cohort, where 46.7% of NSCLC patients were found to be sarcopenic, only 7.3% were  
19 underweight. Furthermore, of those classified as overweight in terms of body mass index, 59% were sarcopenic [17]. It may, therefore, be more useful to  
20 assess sarcopenia, rather than weight loss or BMI, when evaluating the suitability of NSCLC patients for future treatments.  
21  
22  
23  
24  
25  
26  
27  
28  
29  
30  
31  
32  
33  
34

35 Much of the discussion of sarcopenia, as it relates to cancer cachexia, has relied on the narrower definition of loss of muscle mass. Whilst loss of  
36 function is a recognised later consequence of cancer cachexia, muscle strength or performance have not been routinely measured as part of the initial  
37 assessment of cachexia severity, despite being central to the current, broader definition of sarcopenia. As clear consensus emerges on the definitions of  
38  
39  
40  
41  
42  
43  
44  
45



1  
2  
3  
4  
5 cachexia [18-20], a better understanding of the inter-dependence between cachexia and sarcopenia suggests that early recognition of sarcopenia as part of,  
6  
7 or prior to, cachexia in NSCLC may yield improvements in patient outcomes.  
8  
9

10  
11 To understand this further, we aimed to systematically review all relevant literature pertaining to factors associated with loss of muscle mass in  
12 lung cancer, and the relationship between muscle performance and muscle mass, in order to critically evaluate its implications for research and clinical  
13 practice.  
14  
15  
16  
17  
18  
19

## 20 **Methods**

### 21 *Search strings and data sources*

22  
23  
24  
25  
26  
27  
28

29 We executed a broad literature search, including various terminologies used to describe loss of muscle mass, but also specifically used 'sarcopenia' as a  
30 multi-purpose field search term. Recognising that changes in muscle mass may impact on muscle strength and physical function, we included these terms in  
31 our search. We united two search strings: loss of muscle mass (and its implications) AND lung cancer (see Table 1). The search was limited to English  
32 language and humans, with a publication date from 1946 to October 2012. We used the same search strings to develop strategies in the following five  
33 databases in order to ensure maximal coverage: Medline, Medline In-Process, EMBASE, AMED, and the Cochrane library.  
34  
35  
36  
37  
38  
39  
40  
41  
42  
43  
44  
45

1  
2  
3  
4  
5  
6  
7  
8  
9  
10  
11  
12  
13  
14  
15  
16  
17  
18  
19  
20  
21  
22  
23  
24  
25  
26  
27  
28  
29  
30  
31  
32  
33  
34  
35  
36  
37  
38  
39  
40  
41  
42  
43  
44  
45  
46  
47  
48  
49

Table 1: Search strings and terms

| Search strings             | Search terms                               |
|----------------------------|--------------------------------------------|
| <b>Loss of muscle mass</b> | Sarcopenia OR                              |
|                            | Muscle atrophy OR                          |
|                            | Muscle weakness OR                         |
|                            | Muscle mass OR                             |
|                            | Muscle wasting OR                          |
|                            | Muscle loss OR                             |
|                            | Weight loss OR                             |
|                            | Muscle strength OR                         |
|                            | Physical fitness OR                        |
|                            | Physical exertion OR                       |
|                            | Activities of daily living OR              |
|                            | Cachexia                                   |
|                            | <b>AND</b>                                 |
| <b>Lung cancer</b>         | Lung (neoplasm OR malignancy OR tumour)    |
|                            | Pleural (neoplasm OR malignancy OR tumour) |

*Paper retrieval*

Citations were independently screened by two researchers (JC and SN) and included for initial analysis if they described muscle mass measurements or body composition in patients with lung cancer. Both prospective and retrospective original articles were included, but citations without abstracts, case reports, review articles and opinion pieces were excluded. All studies that had a cohort of lung cancer patients were included, even if there were other cancer patient groups analysed. Retrieved papers were searched for additional relevant references.

#### *Inclusion criteria and data extraction*

The selected papers were reviewed in full by two independent researchers (JC and SN) for consideration of inclusion in the review. Where discordance in selection was observed, the paper in question was discussed until consensus was reached. As there were many papers describing muscle mass as part of routine anthropometry or body composition assessments, without directly exploring it, we only included papers in which muscle mass was explored as an outcome measure. Data including patient characteristics and numbers, histological subtype, and TNM stage, were collated and tabulated (Tables 3-4). We also noted units of muscle mass measurements, and techniques used to measure these.

#### **Results**

1  
2  
3  
4  
5 Using our broad search terms in 5 databases, we found an initial 5226 citations, from which we identified 57 potentially relevant papers. Three further  
6  
7 potential papers [21-23] were identified from the references of these papers. From these, we excluded 11 abstracts with no published papers, a further  
8  
9 abstract that did not mention muscle mass or body composition [24], and a systematic review of cancer cachexia [25]. Out of the 47 final papers, we  
10  
11 excluded a further 13 papers which mentioned muscle mass in baseline anthropometry details but did not use it as an outcome measure [26-38], four  
12  
13 papers which described weight loss rather than loss of muscle mass [39-42], and one paper describing the same results obtained from the same patient  
14  
15 population as another paper [43], with slightly different secondary endpoints [44]. During the process of data extraction, a number of recurring themes  
16  
17 became apparent. We have presented these under two main headings – factors associated with loss of muscle mass, and degree of loss of muscle mass and  
18  
19 physical functioning. A number of studies explored multiple variables associated with loss of muscle mass, and are therefore mentioned under more than  
20  
21 one heading.  
22  
23  
24  
25  
26  
27

28 Figure 1 shows a breakdown of the results of our search using the search terms used, and the derivation of papers for final analysis.  
29  
30

31 **Insert Figure 1 here**  
32  
33  
34  
35  
36

37 For the final analysis, 4 randomised controlled studies, 16 cross-sectional studies and 9 longitudinal studies met the established criteria: 29 papers in total.  
38

39 Muscle mass data were reported variously as fat free mass, body cell mass, lean body mass, appendicular skeletal muscle mass, smooth muscle area at L3,  
40  
41  
42  
43  
44  
45

mid upper arm circumference and arm muscle area. Notably, most studies described muscle mass in more than one way. Muscle function was described as hand-grip and/or quadriceps strength [21, 45-48], intensity of physical activity [49], patient-reported physical functioning [22], and both muscle strength and physical performance [50].

Table 2 shows an overview of the studies, whereas tables 3-4 show the studies' results in greater detail.

Table 2: Overview of studies exploring loss of muscle mass and/or sarcopenia in patients with lung cancer

| Headings, Authors                                                       | Muscle Mass Measurements | Results                                                                                    | p                                             |
|-------------------------------------------------------------------------|--------------------------|--------------------------------------------------------------------------------------------|-----------------------------------------------|
| Factors associated with loss of muscle mass<br><i>McMillan 2001[51]</i> | BCM derived from TBK     | Albumin concentrations correlate positively with BCM and inversely with C-reactive protein | p<0.001,<br>r=0.686;<br>r= -0.545,<br>p<0.001 |
| <i>Crown 2002[52]</i>                                                   | FFM, MUAC                | No significant difference in IGF                                                           | p=NR                                          |

|                             |           |                                                                                  |                     |
|-----------------------------|-----------|----------------------------------------------------------------------------------|---------------------|
|                             |           | system concentrations                                                            |                     |
| <b>Jagoe 2002[53]</b>       | FFMi      | Inverse relationship between cathepsin-B expression and FFMi                     | p=0.003,<br>r=-0.57 |
| <b>Op den Kamp 2012[49]</b> | FFMi      | No significant difference in ubiquitin proteasome system concentration           | p=NS                |
| <b>Vigano 2012[45]</b>      | LBM, ALM  | Trend towards lower LBM in ACE gene polymorphism, ID compared to II groups       | p=0.07              |
| <b>Harvie 2003[23]</b>      | FFM       | Decreasing trend in FFM post-chemotherapy compared to baseline in men, not women | p=0.063             |
| <b>Harvie 2005 [54]</b>     | FFM       | No significant change in FFM post-chemotherapy compared to baseline              | p=NS                |
| <b>Bovio 2008 [55]</b>      | AMA       | More men had AMA <5 <sup>th</sup> percentile than women                          | p<0.01              |
| <b>Baracos 2010[17]</b>     | SMA at L3 | Sarcopenia in 61% men, 31% women                                                 | p<0.001             |
| <b>Hansell 1985[56]</b>     | LBM, MUAC | Less LBM in weight-losing vs weight-stable cancer patients; No difference        | p<0.005<br>p=NS     |

|                                              |                         |                                                                                                            |                    |
|----------------------------------------------|-------------------------|------------------------------------------------------------------------------------------------------------|--------------------|
|                                              |                         | in REE adjusted for LBM                                                                                    |                    |
| <b><i>Fredrix 1990[57]</i></b>               | FFM                     | No significant difference in FFM;<br>but REE/FFM significantly raised in LC                                | p=NS<br>p<0.01     |
| <b><i>Staal van den Brekel 1997 [58]</i></b> | FFM                     | REE/FFM decreased post-<br>chemotherapy compared to baseline                                               | p<0.005            |
| <b><i>Simons 1997[59]</i></b>                | FFM, FFMi               | Detectable leptin vs non-detectable<br>leptin groups, non-significant<br>difference in FFM, nor in REE/FFM | p=NS               |
| <b><i>Simons 1999[60]</i></b>                | BCM, BCMi               | High REE/BCM associated with low<br>BCM                                                                    | r=-0.54<br>p=0.03  |
| <b><i>Scott 2001[61]</i></b>                 | BCM derived from<br>TBK | REE/BCM higher in LC compared to<br>controls and correlates with<br>inflammatory response                  | p<0.01<br>r=0.753  |
| <b><i>Jatoi 2001[62]</i></b>                 | FFM, BCM, LBM           | REE adjusted for BCM<br>REE adjusted for LBM                                                               | p=0.032<br>p=0.001 |
| <b><i>Jagoe 2001[21]</i></b>                 | FFM, FFMi,<br>BFMAMA    | No difference in muscle mass<br>parameters pre-operative LC patients                                       | p=NS               |

|                                 |                                            |                                                                            |            |
|---------------------------------|--------------------------------------------|----------------------------------------------------------------------------|------------|
|                                 |                                            | vs controls                                                                |            |
| <b>Sarhill 2003[63]</b>         | AMA, LBM                                   | Cachectic versus non-cachectic AMA<br>84% versus 69%                       | p=0.037    |
| <b>Prado 2008[12]</b>           | SMA at L3                                  | SMA in sarcopenic obese significantly<br>less than in non sarcopenic obese | p<0.0001   |
| <b>Kilgour 2010[47]</b>         | SMMI                                       | Sarcopenic patients have higher<br>levels of fatigue                       | p<0.01     |
| <b>Peddle-McIntyre 2012[50]</b> | ALM, whole body<br>SM (skeletal<br>muscle) | No change in ALM or SM post<br>resistance exercise training                | p=NS       |
| <b>Bauer 2005[64]</b>           | LBM                                        | No change in LBM post nutrition<br>counselling and EPA                     | p=NS       |
| <b>Fearon 2006 [22]</b>         | LBM                                        | No significant change in LBM in<br>groups treated with 2g or 4g EPA        | p=NS       |
| <b>Tozer 2008 [48]</b>          | BCM                                        | BCM increased in group given<br>cysteine-rich protein supplements          | p=0.01     |
| <b>Murphy 2010[65]</b>          | SMA at L3                                  | Sarcopenic patients had lower levels<br>of EPA, DHA and n-3 fatty acids    | All p<0.05 |



|                                                               |                      |                                                                                           |                               |
|---------------------------------------------------------------|----------------------|-------------------------------------------------------------------------------------------|-------------------------------|
| <i>Murphy 2011[66]</i>                                        | SMA at L3            | Rate of muscle loss in standard care group greater than in fish oil group                 | p<0.05                        |
| <i>Agteresch 2002[43]</i>                                     | FFM, MUAC, BCM       | All measures of muscle mass in ATP-treated group increased compared to controls           | p=0.02,<br>p=0.02,<br>p=0.054 |
| <i>Beijer 2009[67]</i>                                        | MUAC                 | Effect of ATP no difference on MUAC, but confers survival benefit                         | p=NS<br>p=0.025               |
| <b>Degree of loss of muscle mass and physical functioning</b> |                      |                                                                                           |                               |
| <i>Jago 2001[21]</i>                                          | FFM, FFMi,<br>BFMAMA | HGS and FFM both not significantly different comparing pre-operative patients to controls | p=NS                          |
| <i>Fearon 2006[22]</i>                                        | LBM                  | Physical functioning improved by 7% in group treated with 2g EPA vs placebo               | p=0.04                        |
| <i>Tozer 2008 [48]</i>                                        | BCM                  | HGS increased after treatment with cysteine-rich protein                                  | p=0.044                       |

|                                 |                                 |                                                                                             |                |
|---------------------------------|---------------------------------|---------------------------------------------------------------------------------------------|----------------|
| <b>Trutschnigg 2008 [46]</b>    | FFM                             | HGS and FFM both greater in men compared to women                                           | p<0.05         |
| <b>Kilgour 2010[47]</b>         | SMMI                            | Fatigue related to poorer hand grip strength and quadriceps strength                        | Both<br>p<0.05 |
| <b>Vigano 2012[45]</b>          | LBM, ALM                        | ACE gene DD group higher handgrip force compared to II group                                | p<0.05         |
| <b>Peddle-McIntyre 2012[50]</b> | ALM, whole body skeletal muscle | Chest press and leg press increased post resistance training; as did functional performance | All p<0.05     |
| <b>Op den Kamp 2012[49]</b>     | FFMi                            | Higher intensity of physical activity                                                       | p=0.049        |

**Keys:** TBK – total body potassium, FFM – fat free mass, FFMi – fat free mass index, MUAC – mid upper arm circumference, TSFT – triceps skinfold thickness, AMA – Arm muscle area, BFMAMA – bone free mid arm muscle area, BCM – body cell mass, LBM – lean body mass, ALM – appendicular lean mass, SMMI – skeletal muscle mass index, SMA – skeletal muscle area, LC – lung cancer, NR – not recorded, NS – non significant, ILGF – insulin like growth factor, HGS – hand grip strength, QS – quadriceps strength, DL – detectable leptin, NDL – non detectable leptin, ACE – angiotensin converting enzyme, ID – insertion/deletion, II – insertion/insertion, DD – deletion/deletion, ATP – adenosine triphosphate, EPA – eicosapentaenoic acid, DHA – docosahexaenoic acid, REE – resting energy expenditure

*Factors associated with loss of muscle mass*

Table 3: Factors associated with loss of muscle mass

| Authors              | Patients   |                                                                                 | Study                      |                             |                                         | Comparison                   | Result                                                                                        |                                                                                                                                                                                                                                            |
|----------------------|------------|---------------------------------------------------------------------------------|----------------------------|-----------------------------|-----------------------------------------|------------------------------|-----------------------------------------------------------------------------------------------|--------------------------------------------------------------------------------------------------------------------------------------------------------------------------------------------------------------------------------------------|
|                      | No, (M/F)  | Tumour, Stage                                                                   | Muscle Mass Measurement(s) | Method of Measurement       | Design                                  |                              |                                                                                               | Controls                                                                                                                                                                                                                                   |
| <b>McMillan 2001</b> | 40 (40/0)  | NSCLC n=11, upper GI n=22, colon n=7.<br><br>All locally advanced or metastatic | BCM                        | Total body potassium        | Cross-sectional                         | Nil                          | The inter-relationship between albumin, body cell mass and the systemic inflammatory response | Albumin concentrations correlated with BCM (r=0.686, p<0.001) and negatively correlated with CRP (r=-0.545, p<0.001)                                                                                                                       |
| <b>Crown 2002</b>    | 30 (NR/NR) | NSCLC in all Inoperable, stage NR                                               | FFM, MUAC                  | BIA, upper arm measurements | Case-control, Longitudinal over 2 years | n=30 healthy volunteers (HV) | Insulin-like growth factor (ILGF) system and cancer cachexia                                  | More LC than HV had MAMC in the lowest quartile (p<0.05) at baseline,<br><br>Male LC patients had lower FFM than male HV (p<0.05) at baseline,<br><br>No sig longitudinal trend observed in IGFBP-3 and IL-6 and nutritional status, p=NS. |
| <b>Jago 2002</b>     | 36 (27/9)  | Mix of NSCLC and                                                                | FFMi                       | BIA, Four skinfold          | Cross-                                  | n=10                         | Ubiquitin-proteasome and                                                                      | Cathepsin B expression in LC inversely related to                                                                                                                                                                                          |

1  
2  
3  
4  
5  
6  
7  
8  
9  
10  
11  
12  
13  
14  
15  
16  
17  
18  
19  
20  
21  
22  
23  
24  
25  
26  
27  
28  
29  
30  
31  
32  
33  
34  
35  
36  
37  
38  
39  
40  
41  
42  
43  
44  
45  
46  
47  
48  
49

|              |                    |           |                                                                                |                                                                                             |                                                                                                                                                                                                       |
|--------------|--------------------|-----------|--------------------------------------------------------------------------------|---------------------------------------------------------------------------------------------|-------------------------------------------------------------------------------------------------------------------------------------------------------------------------------------------------------|
| SCLC         | method,<br>%BFMAMA | sectional | patients<br>referred for<br>thoracotomy<br>for non-<br>malignant<br>conditions | lysosomal<br>proteolytic<br>pathway gene<br>expression in LC<br>and association<br>with LMM | FFMi, p=0.003;<br><br>Cathepsin-B expression<br>increased in 'depleted<br>FFMi cancer patients' vs<br>controls p=0.003;<br><br>No relationship between<br>cathepsin B expression<br>and %BFMAMA, p=NS |
| Stage 1 – 21 |                    |           |                                                                                |                                                                                             |                                                                                                                                                                                                       |
| Stage 2 – 6  |                    |           |                                                                                |                                                                                             |                                                                                                                                                                                                       |
| Stage 3 – 6  |                    |           |                                                                                |                                                                                             |                                                                                                                                                                                                       |
| Stage 4 – 2  |                    |           |                                                                                |                                                                                             |                                                                                                                                                                                                       |

|                             |                   |                                                                             |          |                         |                     |                               |                                                                                                                                               |                                                                                                                                                                                                                |
|-----------------------------|-------------------|-----------------------------------------------------------------------------|----------|-------------------------|---------------------|-------------------------------|-----------------------------------------------------------------------------------------------------------------------------------------------|----------------------------------------------------------------------------------------------------------------------------------------------------------------------------------------------------------------|
| <b>Op den Kamp<br/>2012</b> | 16 (15/1)         | NSCLC in all<br>Stage I-II –<br>11<br>Stage IIIA – 2<br>Stage IIIB – 3      | FFMi     | DEXA                    | Cross-<br>sectional | n=10<br>healthy<br>volunteers | Skeletal muscle NF-<br>κB and ubiquitin<br>proteasome system<br>activity in pre-<br>cachexia                                                  | FFMi no significant<br>difference in pre-<br>cachectic cancer vs<br>controls, p=NS;<br><br>NF-κB, UPS E3-ligase and<br>26S proteasome activity<br>not raised in pre-<br>cachectic cancer<br>patients, all p=NS |
| <b>Vigano 2012</b>          | N=172<br>(101/71) | NSCLC n=64,<br>All stage III<br>and IV.<br>Metastatic<br>GI cancer<br>n=108 | LBM, ALM | DEXA (n=64)             | Cross-<br>sectional | Nil                           | ACE gene<br>polymorphism<br>(insertion <sup>2</sup> -II,<br>insertion/deletion-<br>ID, deletion <sup>2</sup> -DD)<br>on nutritional<br>status | Trend (p=0.07) towards<br>lower LBM in ID<br>compared to II groups                                                                                                                                             |
| <b>Harvie 2003</b>          | 50 (32/18)        | NSCLC In all,<br>Stage III and<br>IV                                        | FFM      | Four skinfold<br>method | Longitudinal        | Nil                           | Exploration of<br>gender-specific<br>differences in body                                                                                      | Trend for FFM to<br>decrease (p=0.063) and<br>FFM decreased (p<0.05)                                                                                                                                           |

|                     |               |                                                                                                             |           |                             |                 |              |                                                                                                                             |                                                                                                                                                              |
|---------------------|---------------|-------------------------------------------------------------------------------------------------------------|-----------|-----------------------------|-----------------|--------------|-----------------------------------------------------------------------------------------------------------------------------|--------------------------------------------------------------------------------------------------------------------------------------------------------------|
|                     |               |                                                                                                             |           |                             |                 |              | composition and REE pre- and post-chemotherapy                                                                              | in men after chemotherapy. No significant difference in FFM or REE in women.                                                                                 |
| <b>Harvie 2005</b>  | 43 (28/15)    | NSCLC in all, Stage III and IV. Alongside this metastatic breast and melanoma patients evaluated separately | FFM       | Four skinfold method        | Longitudinal    | Nil          | Relationship between energy intake, REE and acute phase response vs changes in body composition over course of chemotherapy | No significant change in FFM over the course of chemotherapy, and no significant relationship with energy intake, REE or c-reactive protein (CRP) (all p=NS) |
| <b>Bovio 2008</b>   | 144 (92/52)   | LC n=46, colon n=22, HCC n=11, other n=65<br>Stage NR                                                       | AMA       | Upper arm measurements      | Cross-sectional | Nil          | Evaluation of nutritional status in patients with advanced cancer                                                           | 63% men vs 19% women had AMA <5 <sup>th</sup> percentile (p<0.01)                                                                                            |
| <b>Baracos 2010</b> | 441 (229/212) | NSCLC in all<br>Stage III – 206<br>Stage IV – 235                                                           | SMA at L3 | CT of L3                    | Cross-sectional | Nil          | The use of CT images in evaluating body composition in NSCLC                                                                | 61.1% men in cohort were sarcopenic, 31.3% of women sarcopenic, p<0.001                                                                                      |
| <b>Hansell 1985</b> | 98 (63/35)    | Colorectal cancer n=55, Gastric                                                                             | LBM, MUAC | Tritiated saline, upper arm | Cross-sectional | n=38<br>non- | REE in weight-losing cancer                                                                                                 | WLC compared to WSC had lower LBM                                                                                                                            |

1  
2  
3  
4  
5  
6  
7  
8  
9  
10  
11  
12  
13  
14  
15  
16  
17  
18  
19  
20  
21  
22  
23  
24  
25  
26  
27  
28  
29  
30  
31  
32  
33  
34  
35  
36  
37  
38  
39  
40  
41  
42  
43  
44  
45  
46  
47  
48  
49

|                                      |                              |                                                                                  |     |              |                     |                        |                                                                              |                                                                                                                                                                                                                                                                                                                              |
|--------------------------------------|------------------------------|----------------------------------------------------------------------------------|-----|--------------|---------------------|------------------------|------------------------------------------------------------------------------|------------------------------------------------------------------------------------------------------------------------------------------------------------------------------------------------------------------------------------------------------------------------------------------------------------------------------|
|                                      |                              | cancer n=24,<br>LC n=12,<br>Other cancer<br>n=7                                  |     | measurements |                     | malignant<br>illnesses | patients                                                                     | (p<0.005);<br><br>WLC compared to WSC<br>and WSCon lower MAMC<br>(p<0.0005);<br><br>WLC had increased<br>REE/kgBodyweight<br>compared with both WS<br>groups (p<0.005);<br><br>No significant difference<br>when REE is expressed in<br>terms of kgLBM;<br><br>WLC had positive<br>relationship with REE,<br>r=0.83, p<0.001 |
| <b>Fredrix 1990</b>                  | 39 (GCR<br>13/9, LC<br>16/1) | LC n=17<br><br>GCR –<br>Gastric and<br>colorectal<br>cancer n=22<br><br>Stage NR | FFM | BIA          | Cross-<br>sectional | n=40<br>healthy        | REE and weight loss                                                          | FFM: LC 50.4±8.9,<br>Controls 51.1±9.6, p=NS;<br><br>REE/FFM: LC 33.5±5.4,<br>Controls 29.6±2.9,<br>p<0.01                                                                                                                                                                                                                   |
| <b>Staal-van den<br/>Brekel 1997</b> | 12 (10/2)                    | All SCLC                                                                         | FFM | BIA          | Longitudinal        | Nil                    | Assess REE and<br>systemic<br>inflammation pre-<br>and post-<br>chemotherapy | No change in FFM post-<br>chemo (p=NS). Absolute<br>REE and REE adjusted for<br>FFM decreased post-<br>chemotherapy (p<0.005)                                                                                                                                                                                                |

1  
2  
3  
4  
5  
6  
7  
8  
9  
10  
11  
12  
13  
14  
15  
16  
17  
18  
19  
20  
21  
22  
23  
24  
25  
26  
27  
28  
29  
30  
31  
32  
33  
34  
35  
36  
37  
38  
39  
40  
41  
42  
43  
44  
45  
46  
47  
48  
49

|                    |           |                                                                                                  |           |      |                 |     |                                                                                  |                                                                                                                                                                                                                    |
|--------------------|-----------|--------------------------------------------------------------------------------------------------|-----------|------|-----------------|-----|----------------------------------------------------------------------------------|--------------------------------------------------------------------------------------------------------------------------------------------------------------------------------------------------------------------|
| <b>Simons 1997</b> | 21 (21/0) | NSCLC n=19<br>Stage I – 3<br>Stage III – 5<br>Stage IV – 11<br><br>SCLC n=2<br>Limited stage – 2 | FFM, FFMi | DEXA | Cross-sectional | Nil | Relationship between detectable leptin (DL) expression, body composition and REE | DL vs NonDL no significant difference between groups with regards FFM, FFMi, and REE/FFM, all p=NS                                                                                                                 |
| <b>Simons 1999</b> | 20 (20/0) | NSCLC n=18<br>I-II – 2<br>III – 5<br>IV – 11<br><br>SCLC n=2                                     | BCM, BCMi | DEXA | Cross-sectional | Nil | Relationship between weight loss, low BCM and systemic inflammation              | BCM lower in group with weight loss ≥10% compared to group with weight loss <10%, p=NS;<br><br>Low BCMi associated with high REE/BCM, r=-0.54, p=0.03;<br><br>BCMi positively correlated with Karnofsky PS, p=0.02 |

1  
2  
3  
4  
5  
6  
7  
8  
9  
10  
11  
12  
13  
14  
15  
16  
17  
18  
19  
20  
21  
22  
23  
24  
25  
26  
27  
28  
29  
30  
31  
32  
33  
34  
35  
36  
37  
38  
39  
40  
41  
42  
43  
44  
45  
46  
47  
48  
49

|                     |                                    |                                                                                                   |                   |                                                      |                 |                          |                                                                                             |                                                                                                                                                      |
|---------------------|------------------------------------|---------------------------------------------------------------------------------------------------|-------------------|------------------------------------------------------|-----------------|--------------------------|---------------------------------------------------------------------------------------------|------------------------------------------------------------------------------------------------------------------------------------------------------|
| <b>Scott 2001</b>   | 12 (12/0)                          | NSCLC in all, locally advanced                                                                    | BCM               | Total body potassium                                 | Longitudinal    | n=7, healthy subjects    | Inter-relationship between systemic inflammation and REE pre- and post-onset of weight loss | Cancer group had lower REE (p<0.05) and BCM (p<0.001).<br><br>Cancer group REE adjusted for BCM correlated with CRP concentrations (r=0.753, p<0.01) |
| <b>Jatoi 2001</b>   | 18 (10/8)                          | NSCLC in all<br>Stage IA – 6<br>Stage IB – 3<br>Stage IIB – 3<br>Stage IIIA – 4<br>Stage IIIB – 2 | FFM, BCM, LBM     | DEXA, Potassium-40, tritium dilution                 | Cross-sectional | n=18, healthy volunteers | REE in nonmetastatic NSCLC                                                                  | REE in cancer vs controls significantly raised when adjusted for LBM, p=0.001;<br><br>and also when adjusted for BCM, p=0.032                        |
| <b>Jagoe 2001</b>   | 60 (43/17)                         | LC in all                                                                                         | FFM, MAMC, BFMAMA | BIA, four skinfold-thickness, upper arm measurements | Cross-sectional | n=22, mild COPD          | Nutritional status of patients undergoing lung cancer operations                            | No difference in FFMi and BFMAMA comparing LC and controls, all p=NS                                                                                 |
| <b>Sarhill 2003</b> | N=352 but LC only 18% of cohort () | NR                                                                                                | MUAC, AMA         | BIA (n=329)                                          | Cross-sectional | Nil                      | Prospective evaluation of nutritional status in advanced cancer                             | Cachexia group vs non-cachexia group, reduced AMA in 84% vs 69%, p=0.037                                                                             |
| <b>Prado 2008</b>   | N=250, with                        | TNM for                                                                                           | SMA and SMAi at   | CT of L3                                             | Cross-          | Nil                      | Prevalence of                                                                               | SMA in OS 128.1±29.1,                                                                                                                                |



|                                  |                                                   |                                                                                            |           |      |                                       |     |                                                                                            |                                                                                                                                                                                                                                                                              |
|----------------------------------|---------------------------------------------------|--------------------------------------------------------------------------------------------|-----------|------|---------------------------------------|-----|--------------------------------------------------------------------------------------------|------------------------------------------------------------------------------------------------------------------------------------------------------------------------------------------------------------------------------------------------------------------------------|
|                                  | LC 60 (24%)<br>of cohort<br>(136/114)             | cohort<br><br>Stage I – 24<br><br>Stage II – 56<br><br>Stage III – 74<br><br>Stage IV – 96 | L3        |      | sectional                             |     | sarcopenic obesity<br>and chemotherapy<br>toxicity in this<br>cohort                       | ONonS 160±38.1,<br>p<0.0001<br><br>SMAi in OS 43.3±6.3,<br>ONonS 56.4±9.9;<br><br>OS = obese<br>sarcopenic<br><br>ONonS = obese<br>non-sarcopenic<br><br>Median survival assoc<br>with sarcopenia log rank,<br>p<0.0001, OS<br>11.3months and ONonS<br>21.6 months, p<0.0001 |
| <b>Kilgour 2010</b>              | N=84, with<br>LC 16 (19%)<br>of cohort<br>(48/36) | Metastatic<br>57%, locally<br>advanced<br>43%, stage<br>NR                                 | SMMI, ALM | DEXA | Cross-<br>sectional                   | Nil | Relationship of<br>fatigue to muscle<br>mass and strength                                  | Brief fatigue index<br>associated with SMMI<br>(95% CI -8.4 to -1.3)<br>p<0.01, and sarcopenia,<br>p<0.01                                                                                                                                                                    |
| <b>Peddle-<br/>McIntyre 2012</b> | 17 (7,10)                                         | NSCLC n=16<br><br>Stage I-II –11<br><br>Stage III – 5<br><br>Limited<br>stage SCLC<br>n=1  | LBM, ALM  | DEXA | Longitudinal,<br>duration 10<br>weeks | Nil | Resistance exercise<br>training efficacy<br>and feasibility in<br>lung cancer<br>survivors | LBM and ALM no change<br>from baseline to post<br>training, all p=NS                                                                                                                                                                                                         |

|                    |                                     |                                                                       |           |                    |                                                    |     |                                                                                |                                                                                                                           |
|--------------------|-------------------------------------|-----------------------------------------------------------------------|-----------|--------------------|----------------------------------------------------|-----|--------------------------------------------------------------------------------|---------------------------------------------------------------------------------------------------------------------------|
| <b>Bauer 2004</b>  | N=7, with NSCLC 2 (28.6%) of cohort | Adenocarcinoma pancreas n=5, NSCLC n=2                                | LBM       | Deuterium dilution | Longitudinal, duration 10 weeks                    | Nil | Effect of nutrition counselling and EPA supplements on body composition        | Change in LBM post intervention, p=NS                                                                                     |
| <b>Fearon 2006</b> | 518 (355/163)                       | LC n=231<br>Upper GI cancer n=198<br>Other GI cancer n=89<br>Stage NR | LBM       | BIA                | RCT (Double blind, placebo controlled, randomised) | Nil | Effect of 2g and 4g doses of EPA diester vs placebo in the process of cachexia | Group given 2g EPA gained mean 0.9kg LBM and group given 4g EPA lost mean 0.1kg LBM compared to placebo (p=NS)            |
| <b>Tozer 2008</b>  | 66 (49/17); only 35 completed study | All LC<br>Stage NR                                                    | BCM       | NR                 | RCT (Double blind, placebo controlled, randomised) | Nil | Effect of cysteine-rich protein supplement on body weight and body cell mass   | Cysteine group +11.55±18.05% vs control group<br>-5.47±34.63% after treatment (p=0.01), and compared to baseline (p=0.02) |
| <b>Murphy 2010</b> | 41 (19/22)                          | NSCLC in all Stage I – 2                                              | SMA at L3 | CT of L3           | Longitudinal, cohort study over 2.5                | Nil | Relationship between muscle mass, rate of muscle mass                          | Sarcopenia at baseline in 63% men and 59% women;                                                                          |

|                       |              |                                                                                  |                |                                             |                                                        |                                                                                                  |                                             |                                                                                                                                                                                                                                   |
|-----------------------|--------------|----------------------------------------------------------------------------------|----------------|---------------------------------------------|--------------------------------------------------------|--------------------------------------------------------------------------------------------------|---------------------------------------------|-----------------------------------------------------------------------------------------------------------------------------------------------------------------------------------------------------------------------------------|
|                       |              | Stage II – 2                                                                     |                |                                             | months                                                 |                                                                                                  | change, and plasma fatty acids              | Sarcopenic patients had lower plasma EPA (p=0.001), lower plasma DHA (p=0.003), and lower n-3 Fatty Acids (p=0.002) compared to non-sarcopenic patients.                                                                          |
|                       |              | Stage III – 13                                                                   |                |                                             |                                                        |                                                                                                  |                                             |                                                                                                                                                                                                                                   |
|                       |              | Stage IV – 24                                                                    |                |                                             |                                                        |                                                                                                  |                                             |                                                                                                                                                                                                                                   |
| <b>Murphy 2011</b>    | 40 (21/19)   | NSCLC in all<br><br>Stage III – 13<br><br>Stage IV – 27                          | SMA at L3      | CT of L3                                    | Longitudinal, duration 6 weeks<br><br>Open label study | Nil controls; cohort divided into those receiving fish oil (FO) n=17 and standard care (SC) n=24 | Effect of fish oil (FO) on body composition | Sarcopenic at baseline FO 46%, SC 46%;<br><br>Muscle loss rate per 100d, FO 0.1±1.6%, SC -6.8 ±2.6%, p<0.05;<br><br>Positive relationship between plasma EPA concentration and rate of muscle gain, r <sup>2</sup> =0.55, p=0.01. |
| <b>Agteresch 2002</b> | N=58 (38/20) | NSCLC in all including controls (RCT).<br><br>All Stage IIIB or IV, breakdown NR | FFM, MUAC, BCM | Four skinfold thickness, deuterium dilution | Longitudinal, duration 28 weeks<br><br>RCT             | Randomised to ATP group n=28, to control group n=30, all NSCLC                                   | Effect of ATP on body composition           | FFM -0.5kg in controls, but +0.1kg in ATP group, between group difference p=0.02<br><br>MUAC -1.8% in controls, but +1.1% in ATP group, between group difference p=0.02                                                           |

BCM -0.6% per 4weeks in controls, but -0.1% in ATP group, between group diff p=0.054

|                    |                                                                |                                                                                                      |      |                        |                                           |                                                                                        |                                                  |                                                                                                                                                                                              |
|--------------------|----------------------------------------------------------------|------------------------------------------------------------------------------------------------------|------|------------------------|-------------------------------------------|----------------------------------------------------------------------------------------|--------------------------------------------------|----------------------------------------------------------------------------------------------------------------------------------------------------------------------------------------------|
| <b>Beijer 2009</b> | N=100, with LC n=44.<br><br>n=57 completed 8-week study period | LC in 44% (most frequent), colon cancer 13%, various other cancers 43%<br><br>Stage NR "preterminal" | MUAC | Upper arm measurements | Longitudinal, duration 8 weeks<br><br>RCT | Baseline: ATP n=51, Standard care (SC) n=49;<br><br>Completed study: ATP n=29, SC n=28 | Effect of ATP on nutritional status and survival | Post ATP loss of MUAC<br>-2.24mm, SC group<br>-1.52mm, p=NS<br><br>Short term 0-8wks survival benefit with ATP (HR 0.17, p=0.023), and long term 0-6mths survival benefit (HR 0.35, p=0.025) |
|--------------------|----------------------------------------------------------------|------------------------------------------------------------------------------------------------------|------|------------------------|-------------------------------------------|----------------------------------------------------------------------------------------|--------------------------------------------------|----------------------------------------------------------------------------------------------------------------------------------------------------------------------------------------------|

**Keys:** FFM – fat free mass, FFMi – fat free mass index, MUAC – mid upper arm circumference, TSFT – triceps skinfold thickness, AMA – Arm muscle area, BFMAMA – bone free mid arm muscle area, BCM – body cell mass, LBM – lean body mass, ALM – appendicular lean mass, SMMI – skeletal muscle mass index, SMA – skeletal muscle area, LC – lung cancer, NR – not recorded, NS – non significant, ILGF – insulin like growth factor, HGS = hand grip strength, QS = quadriceps strength, DL – detectable leptin, NDL – non detectable leptin. LC – lung cancer, SCLC – small cell lung cancer, NSCLC – non-small cell lung cancer, BIA – bioelectrical impedance analysis, RCT – randomised controlled trial, CT of L3 – computed tomography of the 3<sup>rd</sup> lumbar space, DEXA – dual energy xray absorptiometry, ATP – adenosine triphosphate, REE – resting energy expenditure

1  
2  
3  
4  
5 The studies in our review expressed muscle mass in different ways; we have used the term fat-free mass (FFM) or loss of muscle mass in order to  
6  
7 allow direct comparison. In addition, where the studies in this review defined a patient group as having sarcopenia, they did so based on loss of muscle  
8  
9 mass alone, without evaluation of muscle strength or performance. This needs to be taken into consideration wherever the term sarcopenia is used  
10  
11 throughout this review.  
12  
13  
14  
15  
16  
17

18 In this review, many studies found that those with cachexia and/or weight loss also had coexistent loss of muscle mass [17, 22, 52, 56, 57, 60, 63].  
19  
20 Despite this, none prospectively evaluated the impact this had on cancer outcomes, specifically relating to treatment. Three studies explored the loss of  
21  
22 muscle mass comparing men and women, finding that a significantly greater percentage of men were sarcopenic [17] [55], and that they exhibited a  
23  
24 decreasing trend in FFM after chemotherapy compared with baseline, whereas women did not [23]. Reflecting the process of loss of muscle mass in the  
25  
26 different stages of cancer, a study of sixty pre-operative NSCLC patients with stage I and II disease showed no difference in FFM compared to controls [21],  
27  
28 whereas in a cohort of 352 advanced cancer patients, 84% of those with cachexia had a reduced FFM [63].  
29  
30  
31  
32  
33  
34  
35  
36  
37  
38  
39  
40  
41  
42  
43  
44  
45  
46  
47  
48  
49

The pathophysiology of loss of muscle mass in lung cancer patients is complex, as illustrated in the diversity of papers exploring this. Low FFM was associated with low albumin and high acute phase protein concentrations [51, 52, 60], reflecting the inflammatory pathways involved. Abnormal protein metabolism is implicated in the development of sarcopenia, however in this review neither anabolic [52] nor proteolytic pathways [53] [49] had any

1  
2  
3  
4  
5 consistent effect on loss of muscle mass. The exception to this was the lysosomal protease cathepsin-B, which was significantly increased in depleted FFM  
6  
7 patients [53]. The pathophysiology may also differ depending on disease stage and cachexia phase. There is some evidence ,for example, that in pre-  
8  
9 cachectic NSCLC patients, despite weight loss, the ubiquitin-proteasome proteolytic pathway may not be activated [49, 68]. Different ACE-gene  
10  
11 polymorphism allelic combinations [45] and leptin expression [59] had no significant effects on muscle mass.  
12  
13  
14  
15  
16  
17

18 Fat free mass (FFM) is the major determinant of energy metabolism in humans, represented by resting energy expenditure (REE), and there exists a  
19  
20 linear relationship between REE and FFM in healthy adults [69]. In lung cancer cachexia, this relationship seems to be distorted [58, 60] but results have  
21  
22 been conflicting as to whether REE contributes to the development of lung cancer cachexia [56, 57, 61, 62].  
23  
24  
25  
26  
27

28 Seven interventional studies explored the effect of either nutritional supplements or adenosine triphosphate (ATP) infusions on muscle mass and  
29  
30 function. A randomised controlled study with 518 participants, examining the effect of eicosapentaenoic acid (EPA, found in fish oil) supplements revealed  
31  
32 increased patient-rated physical functioning, but no significant change in FFM, at the end of the study period [22]. A similar, smaller study of 8 participants  
33  
34 concurred [64]. By contrast, one study of fish oil supplementation demonstrated a reduction in the rate of loss of muscle mass; however study numbers  
35  
36 were small – 40 patients in total. In addition, those considered sarcopenic were found to have lower plasma fatty acids than those without, in a study with  
37  
38 41 NSCLC patients [65, 66]. An interventional randomised controlled study with 66 participants found that cysteine-rich protein supplements increased  
39  
40  
41  
42  
43  
44  
45  
46  
47  
48  
49

FFM, as well as hand-grip strength (HGS), compared to conventional protein supplements [48]. Two randomised controlled studies investigating the effect of ATP infusions on body composition gave conflicting reports, one (N=58) finding that ATP slowed the rate of loss of muscle mass [43] while the other (N=100) did not [67].-Only the study by Fearon et al was described power calculations to detect a statistically significant difference.

*Degree of sarcopenia or loss of muscle mass and physical functioning*

Table 4: Degree of loss of muscle mass and physical functioning

| Authors    | Patients   |               | Study                                        |                                                      | Comparison      | Result          |                                                                  |                                                                               |
|------------|------------|---------------|----------------------------------------------|------------------------------------------------------|-----------------|-----------------|------------------------------------------------------------------|-------------------------------------------------------------------------------|
|            | No, (M/F)  | Tumour, Stage | Muscle Function and Muscle Mass Measurements | Method of Measurement                                |                 |                 | Design                                                           | Controls                                                                      |
| Jagoe 2001 | 60 (43/17) | LC in all     | Grip strength Z-score                        | HDA dynamometer                                      | Cross-sectional | n=22, mild COPD | Nutritional status of patients undergoing lung cancer operations | Grip strength in absolute terms or Z-score no difference LC vs controls, p=NS |
|            |            |               | FFM, MAMC, BFMAMA                            | BIA, four skinfold-thickness, upper arm measurements |                 |                 |                                                                  | No difference in FFMi and BFMAMA comparing LC and controls, all p=NS          |

|                             |                                                                                |                                                                                                          |                                                                                 |                                                                                                                   |                                                             |     |                                                                                                                                          |                                                                                                                                                                                                                                                   |
|-----------------------------|--------------------------------------------------------------------------------|----------------------------------------------------------------------------------------------------------|---------------------------------------------------------------------------------|-------------------------------------------------------------------------------------------------------------------|-------------------------------------------------------------|-----|------------------------------------------------------------------------------------------------------------------------------------------|---------------------------------------------------------------------------------------------------------------------------------------------------------------------------------------------------------------------------------------------------|
| <b>Fearon 2006</b>          | 518<br>(355/163)                                                               | LC n=231<br><br>Upper GI<br>cancer<br>n=198<br><br>Other GI<br>cancer n=89<br><br>Stage NR               | LBM                                                                             | BIA                                                                                                               | RCT (Double<br>blind, placebo<br>controlled,<br>randomised) | Nil | Effect of 2g and 4g<br>doses of EPA<br>diester vs placebo<br>in the process of<br>cachexia                                               | Patient-reported physical<br>functioning increased by<br>7% in group receiving 2g<br>EPA compared with<br>controls (p=0.04)                                                                                                                       |
| <b>Tozer 2008</b>           | 66<br>(49/17);<br>only 35<br>completed<br>study                                | All LC<br><br>Stage NR                                                                                   | BCM                                                                             | NR                                                                                                                | RCT (Double<br>blind, placebo<br>controlled,<br>randomised) | Nil | Effect of cysteine-<br>rich protein<br>supplement on<br>body weight and<br>body cell mass                                                | Handgrip force improved<br>by +12.41±16.52% in<br>cysteine group compared<br>to baseline (p=0.019)                                                                                                                                                |
| <b>Trutschnigg<br/>2008</b> | 81<br>(NR/NR)<br><br>74<br>completed<br>muscle<br>function<br>tests<br>(48/26) | Advanced<br>NSCLC and<br>Gastro-<br>intestinal<br>cancer<br>patients,<br>breakdown<br>NR<br><br>Stage NR | Handgrip strength<br><br>In Newton metre<br>for Biodex, and<br>pounds for Jamar | Jamar and<br>Biodex<br>dynamometer<br>(n=74<br>completed)<br><br><br><br><br><br><br><br><br><br>DEXA, BIA (n=70) | Cross-<br>sectional                                         | Nil | Relationship<br>between DEXA and<br>BIA, and Jamar and<br>Biodex<br>dynamometry and<br>their precision in<br>advanced cancer<br>patients | Biodex HGS Mean±SD:<br>Men 47.8±13.6 vs<br>Women 32.7±9.3, p<0.05<br><br>Jamar HGS Mean±SD:<br><br>Men 78.5±21.6 vs<br>Women 49.7±13.5,<br>p<0.001;<br><br>%CV biodex 16.7%,<br>Jamar 6.3%<br><br>Wide limits of agreement<br>in determining FFM, |



|                     |                                          |                                                                              |                                                                         |                                      |                 |     |                                                                                                                            |                                                                                                                                                                                                                                     |
|---------------------|------------------------------------------|------------------------------------------------------------------------------|-------------------------------------------------------------------------|--------------------------------------|-----------------|-----|----------------------------------------------------------------------------------------------------------------------------|-------------------------------------------------------------------------------------------------------------------------------------------------------------------------------------------------------------------------------------|
|                     |                                          |                                                                              | FFM                                                                     | completed)                           |                 |     |                                                                                                                            | DEXA vs BIA, p=NS, but low %CV for FFM DEXA (0.79) and BIA (0.42)                                                                                                                                                                   |
| <b>Kilgour 2010</b> | N=84, with LC 16 (19%) of cohort (48/36) | Metastatic 57%, locally advanced 43%, stage NR                               | Handgrip strength (HGS) in kg, Quadriceps strength (QS) in Newton metre | Jamar (HGS) and Biodex (QS)          | Cross-sectional | Nil | Relationship of fatigue to muscle mass and strength                                                                        | HGS on Fatigue, 95% CI -1.1 to -0.15, p<0.05;<br><br>QS on Fatigue, 95% CI -0.2 to -0.01, p<0.05;<br><br>SMMI, ALM<br><br>DEXA<br><br>Brief fatigue index associated with SMMI (95% CI -8.4 to -1.3) p<0.01, and sarcopenia, p<0.01 |
| <b>Vigano 2012</b>  | N=172 (101/71)                           | NSCLC n=64, Stage III and IV, breakdown NR<br><br>Metastatic GI cancer n=108 | Handgrip force and percentile<br><br>LBM, ALM                           | Jamar dynamometer<br><br>DEXA (n=64) | Cross-sectional | Nil | ACE gene polymorphism (insertion <sup>2</sup> -II, insertion/deletion-ID, deletion <sup>2</sup> -DD) on nutritional status | DD allele group showed greater handgrip force and grip percentile than II group, p<0.05; but no difference in LBM or ALM p=NS<br><br>Trend (p=0.07) towards lower LBM in ID compared to II groups                                   |

1  
2  
3  
4  
5  
6  
7  
8  
9  
10  
11  
12  
13  
14  
15  
16  
17  
18  
19  
20  
21  
22  
23  
24  
25  
26  
27  
28  
29  
30  
31  
32  
33  
34  
35  
36  
37  
38  
39  
40  
41  
42  
43  
44  
45  
46  
47  
48  
49

|                             |           |                                                                         |                                                                                                                                                   |                                                            |                                 |                         |                                                                                |                                                                                                                                                                                         |
|-----------------------------|-----------|-------------------------------------------------------------------------|---------------------------------------------------------------------------------------------------------------------------------------------------|------------------------------------------------------------|---------------------------------|-------------------------|--------------------------------------------------------------------------------|-----------------------------------------------------------------------------------------------------------------------------------------------------------------------------------------|
| <b>Peddle-McIntyre 2012</b> | 17 (7,10) | NSCLC n=16<br>Stage I-II –11<br>Stage III – 5<br>Limited stage SCLC n=1 | Chest press, Leg press, functional performance measure [6MWD – six minute walk distance, Get-up-and-go (GUAG), chair stands and arm curls in 30s] | 1 Repetition-maximum (1RM) in kg                           | Longitudinal, duration 10 weeks | Nil                     | Resistance exercise training efficacy and feasibility in lung cancer survivors | Mean change from baseline to end of training in 95% CI: Chest press 12.3-17.5, Leg press 23.5-39.8, 6MWD 48-124, GUAG -0.4 to -1.2, chair stands 2.3-6.1, arm curls 2.1-5.1, all p<0.05 |
|                             |           |                                                                         | LBM, ALM                                                                                                                                          |                                                            |                                 |                         |                                                                                | LBM and ALM no change from baseline to post training, all p=NS                                                                                                                          |
|                             |           |                                                                         |                                                                                                                                                   | DEXA                                                       |                                 |                         |                                                                                |                                                                                                                                                                                         |
| <b>Op den Kamp 2012</b>     | 16 (15/1) | NSCLC in all<br>Stage I-II –11<br>Stage IIIA – 2<br>Stage IIIB – 3      | Intensity of physical activity<br><br>FFMi                                                                                                        | Triaxial accelerometer (Tracmor) in counts/min<br><br>DEXA | Cross-sectional                 | n=10 healthy volunteers | Skeletal muscle ubiquitin proteasome system activity in pre-cachexia           | High intensity physical activity in LC vs controls p=0.049;<br><br>FFMi no significant difference in pre-cachectic cancer vs controls, p=NS                                             |

Keys: : FFM – fat free mass, FFMi – fat free mass index, MUAC – mid upper arm circumference, TSFT – triceps skinfold thickness, AMA – Arm muscle area, BFMAMA – bone free mid arm muscle area, BCM – body cell mass, LBM – lean body mass, ALM – appendicular lean mass, SMMI – skeletal muscle mass index, SMA – skeletal muscle area, LC – lung cancer, NR – not recorded, NS – non significant, HGS – handgrip strength, QS – quadriceps strength, LC – lung cancer, NSCLC – non-small cell lung cancer, SCLC – small cell lung cancer, EPA – eicosapentaenoic acid, DEXA – dual energy xray absorptiometry, BIA – bioelectrical impedance analysis, ACE – angiotensin converting enzyme.

1  
2  
3  
4  
5  
6  
7  
8  
9  
10  
11  
12  
13  
14  
15  
16  
17  
18  
19  
20  
21  
22  
23  
24  
25  
26  
27  
28  
29  
30  
31  
32  
33  
34  
35  
36  
37  
38  
39  
40  
41  
42  
43  
44  
45  
46  
47  
48  
49

There was very little direct evaluation of the relationship between muscle mass and muscle function. However, the studies that evaluated muscle mass alongside muscle function show that there is limited correlation. Muscle strength seemed to be affected, regardless of loss of muscle mass. In pre-cachectic patients, exercise capacity was significantly reduced, despite maintenance of muscle mass [49], and resistance exercise training increased all parameters of muscle strength and physical performance, with no difference to muscle mass [50].

## Discussion

Loss of muscle mass, as part of a weight-losing syndrome, is a central feature of cancer cachexia. However, changes in muscle mass, and/or performance, may pre-date clinically overt cachexia, as part of aging or secondary to inflammation/disuse. This implies that consideration of both muscle mass and performance, rather than weight loss alone, is clinically important. Understanding this relationship, and the factors associated with each, will provide opportunities for focused intervention to improve clinical outcomes.

The findings of our review highlight several important issues. Whilst studies exploring molecular and metabolic factors associated with loss of muscle mass have contributed to a better understanding of the pathophysiology of cancer cachexia, there remains considerable uncertainty in relation to mechanisms. Our review in lung cancer patients demonstrates inconsistency of findings as to the factors implicated in the development of cachexia,

1  
2  
3  
4  
5 compared to other cancer sites. It highlights the lack of clear therapeutic targets and emphasises the need for concerted, appropriately-sized exploration of  
6  
7 predictive and prognostic factors in lung cancer cachexia.  
8  
9

10  
11  
12  
13 This uncertainty with regard to precise pathophysiological mechanisms is reflected in the lack of consistent effect of interventions aimed at slowing  
14 the rate of loss of muscle mass and improving muscle function in lung cancer. Studies reviewed which refer to cachexia management support a multimodal  
15 approach, including targeted exercise, nutritional counselling, social support and pharmaceutical intervention [70]. This review highlights inherent  
16 challenges of such an approach, with nutritional interventions in particular failing to demonstrate efficacy [71], although the role of exercise is emerging  
17 [50, 72]. It also suggests the need to represent NSCLC patients adequately within trials of new interventions, such as myostatin antibody therapies, rather  
18 than assuming a class effect across tumour sites.  
19  
20  
21  
22  
23  
24  
25  
26  
27  
28  
29

30 Strikingly, our review has demonstrated that, to date, there has not been due attention to the concept of sarcopenia as a distinct, if overlapping  
31 syndrome, in a condition affecting a largely elderly population. It also highlights the difficulty in making comparisons between studies, due to the  
32 heterogeneity of methods employed in measuring muscle mass, and in cut-off values for defining sarcopenia. These values were derived from a large  
33 elderly cohort and the cut-off values based on healthy young adult reference values. These values have been used to define sarcopenia in cancer [20, 73],  
34 including one in this review [47]. The relevance of this definition to cancer patients is debatable, for a number of reasons. Firstly, sarcopenia manifests in  
35  
36  
37  
38  
39  
40  
41  
42  
43  
44  
45

1  
2  
3  
4  
5 cancer patients of all ages and is not isolated to the elderly alone. Secondly, the pathophysiology of sarcopenia in cancer patients may differ at least in part  
6  
7 to that of the non-cancer elderly population [74]. Finally, the recognition of muscle strength and performance as a defining component of sarcopenia in the  
8  
9 elderly needs consideration, within the context of secondary causes – including cancer.  
10

11  
12  
13  
14  
15 The argument for the objective evaluation of physical performance is pertinent, particularly as part of the definitive assessment of sarcopenia along  
16  
17 with measurements of muscle mass. Currently, physical fitness for treatment is determined largely by the performance status (PS) score. This score is  
18  
19 imperfect as it is subjective, with reports of inter-observer variability [75], and there is only a modest correlation between PS and observed physical  
20  
21 performance [76]. Inter-clinician performance status discordance has led to a lower percentage of PS 0 and 1 patients appearing to get chemotherapy [77],  
22  
23 and has led to a call for objective evaluation of physical functioning [78]. Some proposed methods include tests of gait speed and muscle strength. It is  
24  
25 postulated that objective measures of muscle mass and strength together may complement, or even outperform performance status as a predictor of  
26  
27 fitness for systemic treatment, and more successful completion thereof.  
28  
29  
30  
31  
32  
33

34  
35 Our review has several limitations. The heterogeneity of the studies included in this review made it difficult to account for individual risk of bias, not  
36  
37 least because we included a broad range of types of studies from large randomised controlled trials to small observational studies. The inclusion of a wide  
38  
39 range of studies was necessary as this is the first systematic review of sarcopenia in lung cancer, to the best of our knowledge. Our search also was limited  
40  
41  
42  
43  
44  
45

1  
2  
3  
4  
5 to studies published in English, and although our review included some studies with negative or inconclusive findings, there may indeed exist some  
6  
7 publication bias for which we are unable to account.  
8  
9

10  
11  
12  
13 The paper by Temel et al, which demonstrated that early palliative care involvement increased patient survival, as well as quality of life, has  
14 highlighted the importance of supportive measures in a poor-prognosis population receiving active oncological intervention [79]. As such, focusing research  
15 on the identification and management of sarcopenia in lung cancer patients may prove to be a tolerable and cost effective adjunct to current lung cancer  
16 care.  
17  
18  
19  
20  
21  
22  
23  
24  
25

26 Whilst development of a clearer definition of cancer cachexia provides an additional component of a robust, objective clinical framework for  
27 stratification of patients for focused interventions, the enhanced role of muscle strength/performance as a defining assessment of sarcopenia requires  
28 attention. A standardised definition of cancer-related sarcopenia which can be used clinically and in the research setting will harmonise reporting, allowing  
29 for direct comparison of results as well as meta-analysis of data. In the era of stratified medicine, this review identifies opportunities to examine cellular  
30 and genetic factors associated with sarcopenia in NSCLC coherently and to link them with changes in tumour phenotype which impact on morbidity and  
31 survival.  
32  
33  
34  
35  
36  
37  
38  
39  
40  
41  
42  
43  
44  
45

**Conflict of interest statement**

None declared.

**Acknowledgements**

Jemima Collins is funded by Cardiff and Vale University Health Board under the Clinical Research Fellowship scheme.

**References**

1. Rachet B, Woods LM, Mitry E, Riga M, Cooper N, Quinn MJ, Steward J, Brenner H, Esteve J, Sullivan R, Coleman MP. Cancer survival in England and Wales at the end of the 20th century. *Br J Cancer* 2008;99 Suppl 1: S2-10.
2. Vinod SK, Sidhom MA, Gabriel GS, Lee MT, Delaney GP. Why do some lung cancer patients receive no anticancer treatment? *J Thorac Oncol* 2010;5: 1025-1032.
3. Pemberton L, Sumra P, Tetlow C, Bayman N, Summers Y, Taylor P, Blackhall F, Faivre-Finn C, Burt P, Lee L, Harris M, Sheikh H. Do treatment decisions made at lung cancer multi-disciplinary team meetings (MDTs) reflect the actual treatment given in practice? *Lung cancer (Amsterdam, Netherlands)* 2013;79: S36.

4. Cruz-Jentoft AJ, Baeyens JP, Bauer JM, Boirie Y, Cederholm T, Landi F, Martin FC, Michel JP, Rolland Y, Schneider SM, Topinkova E, Vandewoude M, Zamboni M. Sarcopenia: European consensus on definition and diagnosis: Report of the European Working Group on Sarcopenia in Older People. *Age Ageing* 2010;39: 412-423.
5. Janssen I, Heymsfield SB, Ross R. Low relative skeletal muscle mass (sarcopenia) in older persons is associated with functional impairment and physical disability. *J Am Geriatr Soc* 2002;50: 889-896.
6. Baumgartner RN, Koehler KM, Gallagher D, Romero L, Heymsfield SB, Ross RR, Garry PJ, Lindeman RD. Epidemiology of sarcopenia among the elderly in New Mexico. *Am J Epidemiol* 1998;147: 755-763.
7. Landi F, Liperoti R, Fusco D, Mastropaolo S, Quattrociocchi D, Proia A, Tosato M, Bernabei R, Onder G. Sarcopenia and mortality among older nursing home residents. *J Am Med Dir Assoc* 2012;13: 121-126.
8. Muscaritoli M, Anker SD, Argiles J, Aversa Z, Bauer JM, Biolo G, Boirie Y, Bosaeus I, Cederholm T, Costelli P, Fearon KC, Laviano A, Maggio M, Rossi Fanelli F, Schneider SM, Schols A, Sieber CC. Consensus definition of sarcopenia, cachexia and pre-cachexia: joint document elaborated by Special Interest Groups (SIG) "cachexia-anorexia in chronic wasting diseases" and "nutrition in geriatrics". *Clin Nutr* 2010;29: 154-159.
9. Goodpaster BH, Park SW, Harris TB, Kritchevsky SB, Nevitt M, Schwartz AV, Simonsick EM, Tylavsky FA, Visser M, Newman AB. The loss of skeletal muscle strength, mass, and quality in older adults: the health, aging and body composition study. *J Gerontol A Biol Sci Med Sci* 2006;61: 1059-1064.
10. Janssen I, Baumgartner RN, Ross R, Rosenberg IH, Roubenoff R. Skeletal muscle cutpoints associated with elevated physical disability risk in older men and women. *Am J Epidemiol* 2004;159: 413-421.
11. Rolland Y, Abellan van Kan G, Gillette-Guyonnet S, Vellas B. Cachexia versus sarcopenia. *Curr Opin Clin Nutr Metab Care* 2011;14: 15-21.
12. Prado CM, Lieffers JR, McCargar LJ, Reiman T, Sawyer MB, Martin L, Baracos VE. Prevalence and clinical implications of sarcopenic obesity in patients with solid tumours of the respiratory and gastrointestinal tracts: a population-based study. *Lancet Oncol* 2008;9: 629-635.
13. Prado CM, Baracos VE, McCargar LJ, Reiman T, Mourtzakis M, Tonkin K, Mackey JR, Koski S, Pituskin E, Sawyer MB. Sarcopenia as a determinant of chemotherapy toxicity and time to tumor progression in metastatic breast cancer patients receiving capecitabine treatment. *Clin Cancer Res* 2009;15: 2920-2926.
14. Awad S, Tan BH, Cui H, Bhalla A, Fearon KC, Parsons SL, Catton JA, Lobo DN. Marked changes in body composition following neoadjuvant chemotherapy for oesophagogastric cancer. *Clin Nutr* 2012;31: 74-77.
15. Mir O, Coriat R, Blanchet B, Durand JP, Boudou-Rouquette P, Michels J, Ropert S, Vidal M, Pol S, Chaussade S, Goldwasser F. Sarcopenia predicts early dose-limiting toxicities and pharmacokinetics of sorafenib in patients with hepatocellular carcinoma. *PLoS One* 2012;7: e37563.
16. Lieffers JR, Bathe OF, Fassbender K, Winget M, Baracos VE. Sarcopenia is associated with postoperative infection and delayed recovery from colorectal cancer resection surgery. *Br J Cancer* 2012;107: 931-936.
17. Baracos VE, Reiman T, Mourtzakis M, Gioulbasanis I, Antoun S. Body composition in patients with non-small cell lung cancer: a contemporary view of cancer cachexia with the use of computed tomography image analysis. *Am J Clin Nutr* 2010;91: 1133S-1137S.
18. Senior K. Why is progress in treatment of cancer cachexia so slow? *Lancet Oncol* 2007;8: 671-672.
19. Lainscak M, Filippatos GS, Gheorghide M, Fonarow GC, Anker SD. Cachexia: common, deadly, with an urgent need for precise definition and new therapies. *Am J Cardiol* 2008;101: 8E-10E.



20. Fearon K, Strasser F, Anker SD, Bosaeus I, Bruera E, Fainsinger RL, Jatoi A, Loprinzi C, MacDonald N, Mantovani G, Davis M, Muscaritoli M, Ottery F, Radbruch L, Ravasco P, Walsh D, Wilcock A, Kaasa S, Baracos VE. Definition and classification of cancer cachexia: an international consensus. *Lancet Oncol* 2011;12: 489-495.
21. Jagoe RT, Goodship TH, Gibson GJ. Nutritional status of patients undergoing lung cancer operations. *Ann Thorac Surg* 2001;71: 929-935.
22. Fearon KC, Barber MD, Moses AG, Ahmedzai SH, Taylor GS, Tisdale MJ, Murray GD. Double-blind, placebo-controlled, randomized study of eicosapentaenoic acid diester in patients with cancer cachexia. *J Clin Oncol* 2006;24: 3401-3407.
23. Harvie MN, Campbell IT, Thatcher N, Baildam A. Changes in body composition in men and women with advanced nonsmall cell lung cancer (NSCLC) undergoing chemotherapy. *J Hum Nutr Diet* 2003;16: 323-326.
24. Sanchez-Lara K, Turcott JG, Juarez E, Guevara P, Nunez-Valencia C, Onate-Ocana LF, Flores D, Arrieta O. Association of nutrition parameters including bioelectrical impedance and systemic inflammatory response with quality of life and prognosis in patients with advanced non-small-cell lung cancer: a prospective study. *Nutr Cancer* 2012;64: 526-534.
25. Blum D, Omlin A, Baracos VE, Solheim TS, Tan BH, Stone P, Kaasa S, Fearon K, Strasser F, European Palliative Care Research C. Cancer cachexia: a systematic literature review of items and domains associated with involuntary weight loss in cancer. *Crit Rev Oncol Hematol* 2011;80: 114-144.
26. Bruera E, Ernst S, Hagen N, Spachynski K, Belzile M, Hanson J, Summers N, Brown B, Dulude H, Gallant G. Effectiveness of megestrol acetate in patients with advanced cancer: A randomized, double-blind, crossover study. *Cancer Prevention and Control* 1998;2: 74-78.
27. Lindsey AM, Piper BF. Anorexia and weight loss: indicators of cachexia in small cell lung cancer. *Nutr Cancer* 1985;7: 65-76.
28. Wolf RF, Pearlstone DB, Newman E, Heslin MJ, Gonenne A, Burt ME, Brennan MF, Herndon DN, Wilmore DW, Lowry S, Blakemore WS. Growth hormone and insulin reverse net whole body and skeletal muscle protein catabolism in cancer patients. *Annals of Surgery* 1992;216: 280-290.
29. Gioulbasanis I, Baracos VE, Giannousi Z, Xyrafas A, Martin L, Georgoulas V, Mavroudis D. Baseline nutritional evaluation in metastatic lung cancer patients: Mini Nutritional Assessment versus weight loss history. *Ann Oncol* 2011;22: 835-841.
30. Jamieson NB, Brown DJ, Michael Wallace A, McMillan DC. Adiponectin and the systemic inflammatory response in weight-losing patients with non-small cell lung cancer. *Cytokine* 2004;27: 90-92.
31. Melville S, McNurlan MA, Calder AG, Garlick PJ. Increased protein turnover despite normal energy metabolism and responses to feeding in patients with lung cancer. *Cancer Res* 1990;50: 1125-1131.
32. Richards EW, Long CL, Nelson KM, Tohver OK, Pinkston JA, Navari RM, Blakemore WS. Protein turnover in advanced lung cancer patients. *Metabolism* 1993;42: 291-296.
33. Staal-van den Brekel AJ, Schols AM, Dentener MA, ten Velde GP, Buurman WA, Wouters EF. Metabolism in patients with small cell lung carcinoma compared with patients with non-small cell lung carcinoma and healthy controls. *Thorax* 1997;52: 338-341.
34. Staal-van den Brekel AJ, Schols AM, ten Velde GP, Buurman WA, Wouters EF. Analysis of the energy balance in lung cancer patients. *Cancer Res* 1994;54: 6430-6433.
35. van der Meij BS, Schoonbeek CP, Smit EF, Muscaritoli M, van Leeuwen PA, Langius JA. Pre-cachexia and cachexia at diagnosis of stage III non-small-cell lung carcinoma: an exploratory study comparing two consensus-based frameworks. *Br J Nutr* 2012: 1-9.

- 1  
2  
3  
4  
5 36. Ovesen L, Hannibal J, Mortensen EL. The interrelationship of weight loss, dietary intake, and quality of life in ambulatory patients with cancer of the  
6 lung, breast, and ovary. *Nutr Cancer* 1993;19: 159-167.
- 7 37. Richards EW, Long CL, Nelson KM, Pinkston JA, Navari RM, Geiger JW, Gandy RE, Blakemore WS. Glucose metabolism in advanced lung cancer  
8 patients. *Nutrition* 1992;8: 245-251.
- 9 38. Simons JP, Schols AM, Westerterp KR, ten Velde GP, Wouters EF. The use of bioelectrical impedance analysis to predict total body water in patients  
10 with cancer cachexia. *Am J Clin Nutr* 1995;61: 741-745.
- 11 39. Arrieta O, Michel Ortega RM, Villanueva-Rodriguez G, Serna-Thome MG, Flores-Estrada D, Diaz-Romero C, Rodriguez CM, Martinez L, Sanchez-Lara  
12 K. Association of nutritional status and serum albumin levels with development of toxicity in patients with advanced non-small cell lung cancer  
13 treated with paclitaxel-cisplatin chemotherapy: a prospective study. *BMC Cancer* 2010;10: 50.
- 14 40. Jatoi A, Ritter HL, Dueck A, Nguyen PL, Nikcevic DA, Luyun RF, Mattar BI, Loprinzi CL. A placebo-controlled, double-blind trial of infliximab for  
15 cancer-associated weight loss in elderly and/or poor performance non-small cell lung cancer patients (N01C9). *Lung Cancer* 2010;68: 234-239.
- 16 41. Meek CL, Wallace AM, Forrest LM, McMillan DC. The relationship between the insulin-like growth factor-1 axis, weight loss, an inflammation-based  
17 score and survival in patients with inoperable non-small cell lung cancer. *Clin Nutr* 2010;29: 206-209.
- 18 42. Toso S, Piccoli A, Gusella M, Menon D, Bononi A, Crepaldi G, Ferrazzi E. Altered tissue electric properties in lung cancer patients as detected by  
19 bioelectric impedance vector analysis. *Nutrition* 2000;16: 120-124.
- 20 43. Agteresch HJ, Rietveld T, Kerkhofs LG, van den Berg JW, Wilson JH, Dagnelie PC. Beneficial effects of adenosine triphosphate on nutritional status in  
21 advanced lung cancer patients: a randomized clinical trial. *J Clin Oncol* 2002;20: 371-378.
- 22 44. Dagnelie PC, Agteresch HJ. Promising effects of adenosine triphosphate infusion on nutritional status and quality of life in advanced non-small-cell  
23 lung cancer: A randomized clinical trial. *Drug Development Research* 2003;59: 146-151.
- 24 45. Vigano A, Trutschnigg B, Kilgour RD, Hamel N, Hornby L, Lucar E, Foulkes W, Tremblay ML, Morais JA. Relationship between angiotensin-converting  
25 enzyme gene polymorphism and body composition, functional performance, and blood biomarkers in advanced cancer patients. *Clin Cancer Res*  
26 2009;15: 2442-2447.
- 27 46. Trutschnigg B, Kilgour RD, Reinglas J, Rosenthal L, Hornby L, Morais JA, Vigano A. Precision and reliability of strength (Jamar vs. Biodex handgrip)  
28 and body composition (dual-energy X-ray absorptiometry vs. bioimpedance analysis) measurements in advanced cancer patients. *Appl Physiol Nutr*  
29 *Metab* 2008;33: 1232-1239.
- 30 47. Kilgour RD, Vigano A, Trutschnigg B, Hornby L, Lucar E, Bacon SL, Morais JA. Cancer-related fatigue: The impact of skeletal muscle mass and strength  
31 in patients with advanced cancer. *Journal of Cachexia, Sarcopenia and Muscle* 2010;1: 177-185.
- 32 48. Tozer RG, Tai P, Falconer W, Ducruet T, Karabadjian A, Bounous G, Molson JH, Droge W. Cysteine-rich protein reverses weight loss in lung cancer  
33 patients receiving chemotherapy or radiotherapy. *Antioxid Redox Signal* 2008;10: 395-402.
- 34 49. Op den Kamp CM, Langen RC, Minnaard R, Kelders MC, Snepvangers FJ, Hesselink MK, Dingemans AC, Schols AM. Pre-cachexia in patients with  
35 stages I-III non-small cell lung cancer: Systemic inflammation and functional impairment without activation of skeletal muscle ubiquitin proteasome  
36 system. *Lung Cancer* 2012;76: 112-117.
- 37  
38  
39  
40  
41  
42  
43  
44  
45  
46  
47  
48  
49

- 1
- 2
- 3
- 4
- 5 50. Peddle-McIntyre CJ, Bell G, Fenton D, McCargar L, Courneya KS. Feasibility and preliminary efficacy of progressive resistance exercise training in lung cancer survivors. *Lung Cancer* 2012;75: 126-132.
- 6
- 7 51. McMillan DC, Watson WS, O'Gorman P, Preston T, Scott HR, McArdle CS. Albumin concentrations are primarily determined by the body cell mass and the systemic inflammatory response in cancer patients with weight loss. *Nutr Cancer* 2001;39: 210-213.
- 8
- 9 52. Crown AL, Cottle K, Lightman SL, Falk S, Mohamed-Ali V, Armstrong L, Millar AB, Holly JMP. What is the role of the insulin-like growth factor system in the pathophysiology of cancer cachexia, and how is it regulated? *Clinical Endocrinology* 2002;56: 723-733.
- 10
- 11 53. Jagoe RT, Redfern CP, Roberts RG, Gibson GJ, Goodship TH. Skeletal muscle mRNA levels for cathepsin B, but not components of the ubiquitin-proteasome pathway, are increased in patients with lung cancer referred for thoracotomy. *Clin Sci (Lond)* 2002;102: 353-361.
- 12
- 13 54. Harvie MN, Howell A, Thatcher N, Baildam A, Campbell I. Energy balance in patients with advanced NSCLC, metastatic melanoma and metastatic breast cancer receiving chemotherapy--a longitudinal study. *Br J Cancer* 2005;92: 673-680.
- 14
- 15 55. Bovio G, Bettaglio R, Bonetti G, Miotti D, Verni P. Evaluation of nutritional status and dietary intake in patients with advanced cancer on palliative care. *Minerva Gastroenterol Dietol* 2008;54: 243-250.
- 16
- 17 56. Hansell DT, Davies JW, Burns HJG. The relationship between resting energy expenditure and weight loss in benign and malignant disease. *Annals of Surgery* 1986;203: 240-245.
- 18
- 19 57. Fredix EWHM, Soeters PB, Wouters EFM, Deerenberg IM, Von Meyenfeldt MF, Saris WHM. Energy balance in relation to cancer cachexia. *Clinical Nutrition* 1990;9: 319-324.
- 20
- 21 58. Staal-van den Brekel AJ, Schols AM, Dentener MA, ten Velde GP, Buurman WA, Wouters EF. The effects of treatment with chemotherapy on energy metabolism and inflammatory mediators in small-cell lung carcinoma. *Br J Cancer* 1997;76: 1630-1635.
- 22
- 23 59. Simons JP, Schols AM, Campfield LA, Wouters EF, Saris WH. Plasma concentration of total leptin and human lung-cancer-associated cachexia. *Clin Sci (Lond)* 1997;93: 273-277.
- 24
- 25 60. Simons JP, Schols AM, Buurman WA, Wouters EF. Weight loss and low body cell mass in males with lung cancer: relationship with systemic inflammation, acute-phase response, resting energy expenditure, and catabolic and anabolic hormones. *Clin Sci (Lond)* 1999;97: 215-223.
- 26
- 27 61. Scott HR, McMillan DC, Watson WS, Milroy R, McArdle CS. Longitudinal study of resting energy expenditure, body cell mass and the inflammatory response in male patients with non-small cell lung cancer. *Lung Cancer* 2001;32: 307-312.
- 28
- 29 62. Jatoi A, Daly BD, Hughes VA, Dallal GE, Kehayias J, Roubenoff R. Do patients with nonmetastatic non-small cell lung cancer demonstrate altered resting energy expenditure? *Ann Thorac Surg* 2001;72: 348-351.
- 30
- 31 63. Sarhill N, Mahmoud F, Walsh D, Nelson KA, Komurcu S, Davis M, LeGrand S, Abdullah O, Rybicki L. Evaluation of nutritional status in advanced metastatic cancer. *Support Care Cancer* 2003;11: 652-659.
- 32
- 33 64. Bauer JD, Capra S. Nutrition intervention improves outcomes in patients with cancer cachexia receiving chemotherapy--a pilot study. *Support Care Cancer* 2005;13: 270-274.
- 34
- 35 65. Murphy RA, Mourtzakis M, Chu QS, Reiman T, Mazurak VC. Skeletal muscle depletion is associated with reduced plasma (n-3) fatty acids in non-small cell lung cancer patients. *J Nutr* 2010;140: 1602-1606.
- 36
- 37
- 38
- 39
- 40
- 41
- 42
- 43
- 44
- 45
- 46
- 47
- 48
- 49

- 1  
2  
3  
4  
5  
6  
7  
8  
9  
10  
11  
12  
13  
14  
15  
16  
17  
18  
19  
20  
21  
22  
23  
24  
25  
26  
27  
28  
29  
30  
31  
32  
33  
34  
35  
36  
37  
38  
39  
40  
41  
42  
43  
44  
45  
46  
47  
48  
49
66. Murphy RA, Mourtzakis M, Chu QS, Baracos VE, Reiman T, Mazurak VC. Nutritional intervention with fish oil provides a benefit over standard of care for weight and skeletal muscle mass in patients with nonsmall cell lung cancer receiving chemotherapy. *Cancer* 2011;117: 1775-1782.
67. Beijer S, Hupperets PS, van den Borne BE, Eussen SR, van Henten AM, van den Beuken-van Everdingen M, de Graeff A, Ambergen TA, van den Brandt PA, Dagnelie PC. Effect of adenosine 5'-triphosphate infusions on the nutritional status and survival of preterminal cancer patients. *Anti-cancer drugs* 2009;20: 625-633.
68. Khal J, Hine AV, Fearon KC, Dejong CH, Tisdale MJ. Increased expression of proteasome subunits in skeletal muscle of cancer patients with weight loss. *Int J Biochem Cell Biol* 2005;37: 2196-2206.
69. Wang Z, Heshka S, Gallagher D, Boozer CN, Kotler DP, Heymsfield SB. Resting energy expenditure-fat-free mass relationship: new insights provided by body composition modeling. *Am J Physiol Endocrinol Metab* 2000;279: E539-545.
70. Vaughan VC, Martin P, Lewandowski PA. Cancer cachexia: impact, mechanisms and emerging treatments. *J Cachexia Sarcopenia Muscle* 2012.
71. Murphy RA, Yeung E, Mazurak VC, Mourtzakis M. Influence of eicosapentaenoic acid supplementation on lean body mass in cancer cachexia. *Br J Cancer* 2011;105: 1469-1473.
72. McClellan R. Exercise programs for patients with cancer improve physical functioning and quality of life. *J Physiother* 2013;59: 57.
73. Boxer RS, Kenny AM, Dowsett R, Taxel P. The effect of 6 months of androgen deprivation therapy on muscle and fat mass in older men with localized prostate cancer. *Aging Male* 2005;8: 207-212.
74. Argiles JM, Busquets S, Felipe A, Lopez-Soriano FJ. Molecular mechanisms involved in muscle wasting in cancer and ageing: cachexia versus sarcopenia. *Int J Biochem Cell Biol* 2005;37: 1084-1104.
75. Sorensen JB, Klee M, Palshof T, Hansen HH. Performance status assessment in cancer patients. An inter-observer variability study. *Br J Cancer* 1993;67: 773-775.
76. Montoya M, Fossella F, Palmer JL, Kaur G, Pace EA, Yadav R, Simmonds M, Gillis T, Bruera E. Objective evaluation of physical function in patients with advanced lung cancer: a preliminary report. *J Palliat Med* 2006;9: 309-316.
77. May CH, Lester JF, Lee S. Performance status discordance and why it matters. *Lung Cancer* 2012;75: S1-S72.
78. Sonpavde G, Vogelzang NJ, Galsky MD, Raghavan VA, Daniel S. Objective measures of physical functional capacity warrant exploration to complement or replace the subjective physician estimated performance status. *Am J Clin Oncol* 2012;35: 163-166.
79. Temel JS, Greer JA, Muzikansky A, Gallagher ER, Admane S, Jackson VA, Dahlin CM, Blinderman CD, Jacobsen J, Pirl WF, Billings JA, Lynch TJ. Early palliative care for patients with metastatic non-small-cell lung cancer. *N Engl J Med* 2010;363: 733-742.

1  
2  
3  
4  
5 **Systematic Review – Sarcopenia in Lung Cancer**  
6  
7

8  
9 **FIGURE 1**  
10

11  
12 Figure 1: Systematic review search methods  
13  
14

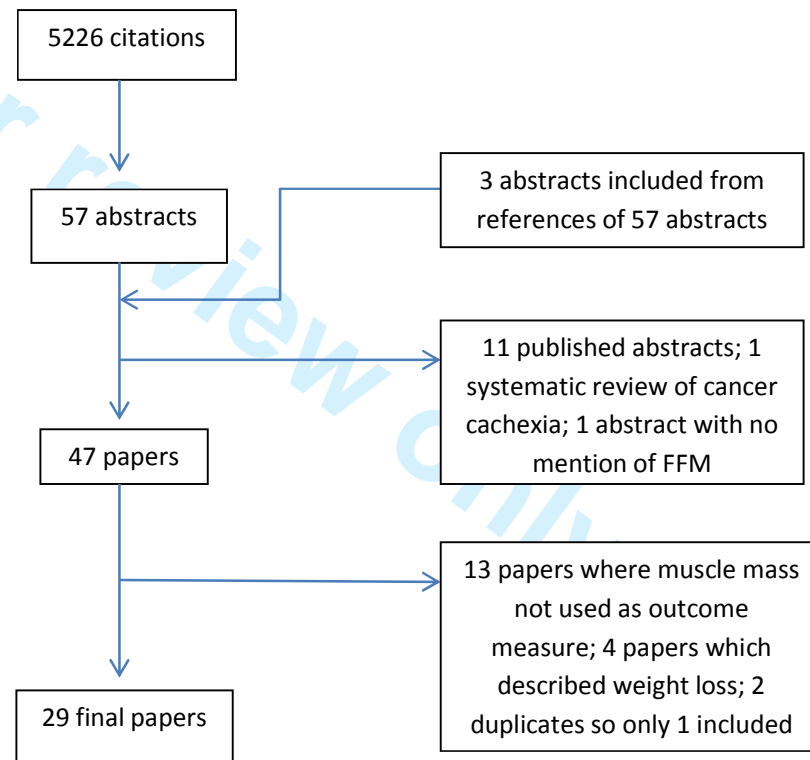

## Research Checklist for Systematic Review manuscript for BMJ Open

### PRISMA statement

From Moher D et al. *BMJ* 2009; 339:b2535

Checklist of items to include when reporting a systematic review or meta-analysis

| Section/topic             | Item No | Checklist item                                                                                                                                                                                                                                                                                         | Reported on page No |
|---------------------------|---------|--------------------------------------------------------------------------------------------------------------------------------------------------------------------------------------------------------------------------------------------------------------------------------------------------------|---------------------|
| <b>Title</b>              |         |                                                                                                                                                                                                                                                                                                        |                     |
| Title                     | 1       | Identify the report as a systematic review, meta-analysis, or both                                                                                                                                                                                                                                     | 1                   |
| <b>Abstract</b>           |         |                                                                                                                                                                                                                                                                                                        |                     |
| Structured summary        | 2       | Provide a structured summary including, as applicable, background, objectives, data sources, study eligibility criteria, participants, interventions, study appraisal and synthesis methods, results, limitations, conclusions and implications of key findings, systematic review registration number | 1-3                 |
| <b>Introduction</b>       |         |                                                                                                                                                                                                                                                                                                        |                     |
| Rationale                 | 3       | Describe the rationale for the review in the context of what is already known                                                                                                                                                                                                                          | 7                   |
| Objectives                | 4       | Provide an explicit statement of questions being addressed with reference to participants, interventions, comparisons, outcomes, and study design (PICOS)                                                                                                                                              | 8                   |
| <b>Methods</b>            |         |                                                                                                                                                                                                                                                                                                        |                     |
| Protocol and registration | 5       | Indicate if a review protocol exists, if and where it can be accessed (such as web address), and, if available, provide registration information including registration number                                                                                                                         | N/A                 |
| Eligibility criteria      | 6       | Specify study characteristics (such as PICOS, length of follow-up) and report characteristics (such as years considered, language, publication status) used as criteria for eligibility, giving rationale                                                                                              | 8,9                 |
| Information sources       | 7       | Describe all information sources (such as databases with dates of coverage, contact with study authors to identify additional studies) in the search and date last searched                                                                                                                            | 9                   |
| Search                    | 8       | Present full electronic search strategy for at least one database, including any limits used, such that it could be repeated                                                                                                                                                                           | 9                   |
| Study selection           | 9       | State the process for selecting studies (that is, screening, eligibility, included in systematic review, and, if applicable, included in the meta-analysis)                                                                                                                                            | 10, Figure 1        |
| Data collection process   | 10      | Describe method of data extraction from reports (such as piloted forms, independently, in duplicate) and any processes for obtaining and confirming data from                                                                                                                                          | 10                  |

| Section/topic                      | Item No | Checklist item                                                                                                                                                                                                        | Reported on page No         |
|------------------------------------|---------|-----------------------------------------------------------------------------------------------------------------------------------------------------------------------------------------------------------------------|-----------------------------|
|                                    |         | investigators                                                                                                                                                                                                         |                             |
| Data items                         | 11      | List and define all variables for which data were sought (such as PICOS, funding sources) and any assumptions and simplifications made                                                                                | 12; Table 2                 |
| Risk of bias in individual studies | 12      | Describe methods used for assessing risk of bias of individual studies (including specification of whether this was done at the study or outcome level), and how this information is to be used in any data synthesis | See notes below             |
| Summary measures                   | 13      | State the principal summary measures (such as risk ratio, difference in means).                                                                                                                                       | See notes below             |
| Synthesis of results               | 14      | Describe the methods of handling data and combining results of studies, if done, including measures of consistency (such as $I^2$ statistic) for each meta-analysis                                                   | See notes below             |
| Risk of bias across studies        | 15      | Specify any assessment of risk of bias that may affect the cumulative evidence (such as publication bias, selective reporting within studies)                                                                         | See notes below             |
| Additional analyses                | 16      | Describe methods of additional analyses (such as sensitivity or subgroup analyses, meta-regression), if done, indicating which were pre-specified                                                                     | See notes below             |
| <b>Results</b>                     |         |                                                                                                                                                                                                                       |                             |
| Study selection                    | 17      | Give numbers of studies screened, assessed for eligibility, and included in the review, with reasons for exclusions at each stage, ideally with a flow diagram                                                        | Figure 1                    |
| Study characteristics              | 18      | For each study, present characteristics for which data were extracted (such as study size, PICOS, follow-up period) and provide the citations                                                                         | Table 2                     |
| Risk of bias within studies        | 19      | Present data on risk of bias of each study and, if available, any outcome-level assessment (see item 12).                                                                                                             | See notes below ref item 12 |
| Results of individual studies      | 20      | For all outcomes considered (benefits or harms), present for each study (a) simple summary data for each intervention group and (b) effect estimates and confidence intervals, ideally with a forest plot             | Tables 3 and 4; pages 18-34 |
| Synthesis of results               | 21      | Present results of each meta-analysis done, including confidence intervals and measures of consistency                                                                                                                | N/A                         |
| Risk of bias across studies        | 22      | Present results of any assessment of risk of bias across studies (see item 15)                                                                                                                                        | N/A                         |
| Additional analysis                | 23      | Give results of additional analyses, if done (such as sensitivity or subgroup analyses, meta-regression) (see item 16)                                                                                                | N/A                         |
| <b>Discussion</b>                  |         |                                                                                                                                                                                                                       |                             |
| Summary of evidence                | 24      | Summarise the main findings including the strength of evidence for each main outcome; consider their relevance to key groups (such as health care providers, users, and policy makers)                                | 34-37                       |
| Limitations                        | 25      | Discuss limitations at study and outcome level (such as risk                                                                                                                                                          | 36-37                       |

| Section/topic  | Item No | Checklist item                                                                                                                                                                                                                | Reported on page No |
|----------------|---------|-------------------------------------------------------------------------------------------------------------------------------------------------------------------------------------------------------------------------------|---------------------|
| Conclusions    | 26      | of bias), and at review level (such as incomplete retrieval of identified research, reporting bias)<br>Provide a general interpretation of the results in the context of other evidence, and implications for future research | 37                  |
| <b>Funding</b> |         |                                                                                                                                                                                                                               |                     |
| Funding        | 27      | Describe sources of funding for the systematic review and other support (such as supply of data) and role of funders for the systematic review                                                                                | N/A                 |

## NOTES

- With reference to item 12, we have tried to account for individual study bias by reporting study sample size and power calculations where reported.
- With reference to items 13, 14 and 16, as this is a systematic review rather than a meta-analysis, this was not performed.
- With reference to item 15, we have not accounted for publication bias. With regards to selective reporting within studies, this was not possible to be performed in great detail but we paid particular attention to the individual reporting of participant numbers, and whether the authors accounted for the number of those not completing the study.
- With reference to item 27, we received no external funding for this systematic review.





**The assessment and impact of sarcopenia in lung cancer: a systematic literature review.**

|                                 |                                                                                                                                                                                                                                                                                                                                           |
|---------------------------------|-------------------------------------------------------------------------------------------------------------------------------------------------------------------------------------------------------------------------------------------------------------------------------------------------------------------------------------------|
| Journal:                        | <i>BMJ Open</i>                                                                                                                                                                                                                                                                                                                           |
| Manuscript ID:                  | bmjopen-2013-003697.R1                                                                                                                                                                                                                                                                                                                    |
| Article Type:                   | Research                                                                                                                                                                                                                                                                                                                                  |
| Date Submitted by the Author:   | 20-Nov-2013                                                                                                                                                                                                                                                                                                                               |
| Complete List of Authors:       | Collins, Jemima; University Hospital of Wales, General Medicine<br>Noble, Simon; Cardiff University, Palliative Medicine<br>Chester, John; Cardiff University, Medical Oncology<br>Coles, Bernadette; Velindre NHS Trust, Cancer Research Wales Library<br>Byrne, Anthony; Cardiff University, Marie Curie Palliative Care Research Group |
| <b>Primary Subject Heading</b>: | Palliative care                                                                                                                                                                                                                                                                                                                           |
| Secondary Subject Heading:      | Palliative care, Oncology                                                                                                                                                                                                                                                                                                                 |
| Keywords:                       | Thoracic medicine < INTERNAL MEDICINE, Respiratory tract tumours < ONCOLOGY, Adult palliative care < PALLIATIVE CARE                                                                                                                                                                                                                      |
|                                 |                                                                                                                                                                                                                                                                                                                                           |

SCHOLARONE™  
Manuscripts

1  
2  
3 **The assessment and impact of sarcopenia in lung cancer: a systematic literature review.**  
4

5  
6 Jemima Collins, MB ChB MRCP, Clinical Research Fellow, Cardiff and Vale University Health Board  
7

8  
9 Simon Noble, MBBS MD FRCP, Reader in Palliative Medicine, Cardiff University  
10

11  
12 John Chester, BA PhD MB BS FRCP, Professor of Medical Oncology, Cardiff University  
13

14  
15 Bernadette Coles, Senior Librarian, Cancer Research Wales Library, Velindre NHS Trust  
16

17  
18 Anthony Byrne, MB ChB FRCP, Director, Marie Curie Palliative Care Research Centre, Cardiff  
19  
20 University  
21

22  
23 **Keywords**  
24

25  
26 Sarcopenia; cachexia; muscle mass; physical performance; lung cancer  
27  
28  
29  
30  
31  
32  
33  
34  
35  
36  
37  
38  
39  
40  
41  
42  
43  
44  
45  
46  
47  
48  
49  
50  
51  
52  
53  
54  
55  
56  
57  
58  
59  
60

## **Abstract**

### Objectives

There is growing awareness of the relationship between sarcopenia (loss of muscle mass and function), and outcomes in cancer, making it a potential target for future therapies. In order to inform future research and practice, we undertook a systematic review of factors associated with loss of muscle mass, and the relationship between muscle function and muscle mass in lung cancer, a common condition associated with poor outcomes.

### Design

We conducted a computerised systematic literature search on five databases. Studies were included if they explored muscle mass as an outcome measure in lung cancer patients, and were published in English.

### Setting

Secondary care

### Participants

Patients with lung cancer

### Primary outcome

Factors associated with loss of muscle mass and muscle function, or sarcopenia, and the clinical impact thereof in lung cancer patients.

### Results

We reviewed 5726 citations, and 35 papers were selected for analysis. Sarcopenia, as defined by reduced muscle mass alone, was found to be very prevalent in lung cancer patients, regardless of body mass index, and where present was associated with poorer functional status and overall

1  
2  
3 survival. There were diverse studies exploring molecular and metabolic factors in the development  
4  
5 of loss of muscle mass, however the precise mechanisms that contribute to sarcopenia and cachexia  
6  
7 remain uncertain. The effect of nutritional supplements and adenosine triphosphate infusions on  
8  
9 muscle mass showed conflicting results. There is very limited data on the correlation between  
10  
11 degree of sarcopenia and muscle function, which has a non-linear relationship in older non-cancer  
12  
13 populations.  
14

### 15 16 17 Conclusion

18  
19 Loss of muscle mass is a significant contributor to morbidity in lung cancer patients. Loss of muscle  
20  
21 mass and function may pre-date clinically overt cachexia, underlining the importance of evaluating  
22  
23 sarcopenia, rather than weight loss alone. Understanding this relationship and its associated factors  
24  
25 will provide opportunities for focused intervention to improve clinical outcomes.  
26  
27  
28  
29  
30  
31

### 32 Article Summary

#### 33 34 35 **Article Focus**

- 36  
37  
38 • Sarcopenia, the loss of muscle mass and muscle function, is a significant contributor to  
39  
40 morbidity in lung cancer patients.
- 41  
42  
43 • Sarcopenia is a key component of a new definition of cancer cachexia, however its  
44  
45 relationship to cachexia in the lung cancer literature is poorly defined.  
46  
47

#### 48 49 **Key messages**

- 50  
51  
52 • Sarcopenia is prevalent in lung cancer patients regardless of body mass index and body  
53  
54 weight, and where present is associated with poorer functional status and overall survival.  
55  
56  
57  
58  
59  
60

- There is very limited data on the correlation between the degree of loss of muscle mass and muscle function, which has a non-linear relationship in older non-cancer populations.
- The heterogeneity of cut-off values for cancer-related sarcopenia necessitates a standardised definition which can be used clinically and in the research setting, to harmonise reporting and allow for direct comparison of results as well as meta-analysis of data.

#### **Strengths and limitations of this study**

- Timely systematic review considering the increasingly recognised phenomenon of sarcopenia, as it relates to cachexia, which affects not only patients with lung cancer, but also the wider cancer population.
- Limited to publications in English only.

## Introduction

Over the last decade, there has been increasing recognition of the clinical importance of sarcopenia as part of the cancer cachexia syndrome, and its impact has been evaluated in a wide range of malignancies including lung, breast, upper gastrointestinal, hepatocellular and colorectal cancers (1-5). The term sarcopenia is derived from the Greek meaning “poverty of flesh” and is characterised by a triad of progressive loss of skeletal muscle mass, muscle strength and physical performance (6). It was originally described in the elderly non-cancer population, and is often now defined as a geriatric syndrome associated with functional impairment, increased risk of falls, fractures and reduced survival (7-9). Sarcopenia becomes more prevalent as we age - of 1,421 healthy adults aged 45 years or over, the overall prevalence was 15%, rising to 64% over the age of 85 (10). This loss of muscle mass is usually gradual and not necessarily associated with significant or sudden weight loss.

The detrimental effects of sarcopenia can also be seen in younger patients in association with muscle disuse, malnutrition, or inflammatory conditions, particularly cancer. Interest in sarcopenia as a poor prognostic indicator in cancer is rising; in various cancer populations sarcopenia is associated with poorer performance status (1), reduced overall survival (11, 12), and increased risk of chemotherapy toxicities (2, 4). This interest is reflected in a recent international consensus on the definition of cancer cachexia, which established sarcopenia as a key diagnostic criterion (13).

1  
2  
3 The hallmark of sarcopenia is low muscle mass, more specifically an appendicular skeletal  
4 muscle mass index of more than two standard deviations below the sex-specific mean of healthy  
5 adults (i.e. 5.45kg/m<sup>2</sup> for women and 7.26 kg/m<sup>2</sup> for men) (8). However, central to the concept of  
6 sarcopenia is the recognition that overall neuromuscular function, rather than muscle mass alone, is  
7 essential for maintenance of independence. Therefore, when defining sarcopenia, it is vital to assess  
8 muscle strength, or physical performance, in addition to muscle mass, as the relationship between  
9 muscle mass and strength is non-linear (14, 15).  
10  
11  
12  
13  
14  
15  
16  
17  
18

19 Whilst many different techniques have been used to measure muscle mass and strength,  
20 few have been incorporated into routine assessment of the cancer population. The current gold  
21 standards are computed tomography (CT), magnetic resonance imaging (MRI), and dual energy x-ray  
22 absorptiometry (DEXA) scans. CT and MRI allow precise differentiation between fat and other soft  
23 tissue including muscle and are therefore investigations of choice. CT focuses on a specific area of  
24 the body – e.g. muscle cross sectional area at the third lumbar vertebra – which can be related to  
25 whole body muscle mass. It is the current gold standard in body composition research and has the  
26 advantage that many patients will have CT scans as part of their diagnostic and treatment  
27 assessments. However, DEXA involves less radiation exposure compared to CT and accurately and  
28 precisely differentiates between lean and fat body compartments (16). More indirect techniques for  
29 measuring muscle mass include bioelectrical impedance analysis which is non-invasive but less  
30 accurate compared to DEXA. It includes a measure of organ mass other than skeletal muscle, but is  
31 easily performed in clinical settings (17). Measurements of mid upper arm circumference and arm  
32 muscle area using skinfold thickness methods have also been used (18), although these assessments  
33 are less accurate and there exists considerable inter-observer variability. Measurements of muscle  
34 strength in the literature have mainly centred around handgrip and quadriceps strength, although in  
35 non-cancer elderly patients, functional assessments such as the Short Physical Performance Battery  
36 and sit-to-stand tests (19, 20) have been shown to correlate with adverse outcomes.  
37  
38  
39  
40  
41  
42  
43  
44  
45  
46  
47  
48  
49  
50  
51  
52  
53  
54  
55  
56  
57  
58  
59  
60

1  
2  
3  
4  
5  
6 From the literature it is clear that there is marked diversity in current clinical practice in  
7  
8 assessing the degree of muscle loss in cancer patients and in quantifying its functional implications.  
9  
10 If the loss of muscle mass and strength have significant clinical implications for cancer patients, then  
11  
12 standardised, validated diagnostic thresholds are clearly needed. Furthermore, while the effects of  
13  
14 sarcopenia have been extensively studied in the elderly, factors associated with loss of muscle mass  
15  
16 and strength in cancer remain unclear. As the pathophysiological mechanisms responsible for loss of  
17  
18 muscle mass in cancer differ, at least in part, from those in sarcopenia of ageing, it is necessary to  
19  
20 evaluate cancer-specific causative factors and clinical implications.  
21  
22  
23  
24  
25  
26

27 We therefore undertook a systematic literature review to further understand the  
28  
29 relationship between muscle function and muscle mass and its implications for research and clinical  
30  
31 practice within the context of cancer. We limited the review to focus on lung cancer as an example  
32  
33 of a common cancer, associated with poor outcomes, in which sarcopenia has been shown to have a  
34  
35 significant prognostic impact. Lung cancer has a worldwide incidence rate of 1.61 million cases per  
36  
37 year (21), and frequently presents in the advanced stages. Despite advances in anticancer therapies,  
38  
39 survival benefits in lung cancer patients over the past thirty years have been relatively small  
40  
41 compared to those seen in breast, colorectal and prostate cancers (22). Whilst reasons for this are  
42  
43 complex, many lung cancer patients are ineligible for radical treatment at presentation due to poor  
44  
45 performance status or co-morbidity, while others fail to receive their intended treatment plan  
46  
47 because of functional decline (23, 24). Non-small cell lung cancer (NSCLC) has a particularly strong  
48  
49 association with loss of muscle mass - of 441 patients consecutively referred to a regional oncology  
50  
51 service, 47% were found to be sarcopenic (25). This prevalence can be compared with 16% of a  
52  
53 cohort of 471 breast cancer survivors (26) and 39% in a cohort of 234 pre-operative colorectal  
54  
55 cancer patients (5). We conducted this systematic review with this in mind.  
56  
57  
58  
59  
60



## Methods

### *Search strings and data sources*

We executed a broad literature search, including various terminologies used to describe loss of muscle mass, but also specifically used 'sarcopenia' as a multi-purpose field search term. Recognising that changes in muscle mass may impact on muscle strength and physical function, we included these terms in our search. We united two search strings: loss of muscle mass (and its implications) AND lung cancer (see Table 1). The search was limited to English language and humans, with a publication date from 1946 to October 2013. We used the same search strings to develop strategies in the following five databases in order to ensure maximal coverage: Medline, Medline In-Process, EMBASE, AMED, and the Cochrane library.

Table 1: Search strings and terms

| Search strings                | Search terms         |
|-------------------------------|----------------------|
| Loss of muscle mass           | Sarcopenia OR        |
|                               | Muscle atrophy OR    |
|                               | Muscle weakness OR   |
|                               | Muscle mass OR       |
|                               | Muscle wasting OR    |
|                               | Muscle loss OR       |
|                               | Weight loss OR       |
|                               | Muscle strength OR   |
|                               | Physical fitness OR  |
|                               | Physical exertion OR |
| Activities of daily living OR |                      |
| Cachexia                      |                      |

|                    |                                            |
|--------------------|--------------------------------------------|
| <b>AND</b>         |                                            |
| <b>Lung cancer</b> | Lung (neoplasm OR malignancy OR tumour)    |
|                    | Pleural (neoplasm OR malignancy OR tumour) |

#### *Paper retrieval*

Citations were independently screened by two researchers (JC and SN) and included for initial analysis if they described muscle mass measurements or body composition in patients with lung cancer. Both prospective and retrospective original articles were included, but conference abstracts, citations without abstracts, case reports, review articles and opinion pieces were excluded. All studies that had a cohort of lung cancer patients were included, even if there were other cancer patient groups analysed. Retrieved papers were searched for additional relevant references.

#### *Inclusion criteria and data extraction*

The selected papers were reviewed in full by two independent researchers (JC and SN) for consideration of inclusion in the review. Where discordance in selection was observed, the paper in question was discussed until consensus was reached. As there were many papers describing muscle mass as part of routine anthropometry or body composition assessments, without directly exploring it, we only included papers in which muscle mass was explored as an outcome measure. Data including patient characteristics and numbers, histological subtype, and TNM stage, were collated and tabulated (Tables 2-3). We also noted units of muscle mass measurements, and techniques used to measure these.

#### **Results**

1  
2  
3  
4  
5  
6 Using our broad search terms in 5 databases, we found an initial 5726 citations, from which we  
7  
8 identified 64 potentially relevant papers. Three further potential papers (27-29) were identified from  
9  
10 the references of these papers. From these, we excluded 11 abstracts with no published papers, two  
11  
12 further abstracts that did not mention muscle mass (30, 31), and a systematic review of cancer  
13  
14 cachexia (32). Out of the 53 final papers, we excluded a further 13 papers which mentioned muscle  
15  
16 mass in baseline anthropometry details but did not use it as an outcome measure (33-45), four  
17  
18 papers which described weight loss rather than loss of muscle mass (46-49), and one paper  
19  
20 describing the same results obtained from the same patient population as another paper (50), with  
21  
22 slightly different secondary endpoints (51). During the process of data extraction, a number of  
23  
24 recurring themes became apparent. We have presented these under two main headings – factors  
25  
26 associated with loss of muscle mass, and degree of loss of muscle mass and physical functioning. A  
27  
28 number of studies explored multiple variables associated with loss of muscle mass, and are  
29  
30 therefore mentioned under more than one heading.  
31  
32  
33  
34  
35  
36  
37

38 Figure 1 shows a breakdown of the results of our search using the search terms used, and the  
39  
40 derivation of papers for final analysis.  
41  
42

43 Insert Figure 1 here  
44  
45  
46  
47  
48

49 For the final analysis, 4 randomised controlled studies, 17 cross-sectional studies and 14 longitudinal  
50  
51 studies met the established criteria: 35 papers in total. Muscle mass data were reported variously as  
52  
53 fat free mass, body cell mass, lean body mass, appendicular skeletal muscle mass, smooth muscle  
54  
55 area at the levels of lumbar vertebra L3 and thoracic vertebra T4, mid upper arm circumference and  
56  
57 arm muscle area. Notably, most studies described muscle mass in more than one way. Muscle  
58  
59  
60

function was described as hand-grip and/or quadriceps strength (17, 27, 52-54), intensity of physical activity (55), patient-reported physical functioning (28), and both muscle strength and physical performance (56).

As the studies in our review expressed muscle mass in different ways, we have used the term fat-free mass (FFM) or loss of muscle mass in the body of our article in order to allow direct comparison. In addition, where the studies in this review defined a patient group as having sarcopenia, they did so based on loss of muscle mass alone, without evaluation of muscle strength or performance. This needs to be borne in mind wherever the term sarcopenia is used throughout this review.

#### *Factors associated with loss of muscle mass*

Table 2: Loss of muscle mass as outcome measures and factors associated with it

| First author, year       | Patients   |                                                                                 | Study                      |                             |                                         |                              | Comparison                                                                                 |
|--------------------------|------------|---------------------------------------------------------------------------------|----------------------------|-----------------------------|-----------------------------------------|------------------------------|--------------------------------------------------------------------------------------------|
|                          | No, (M/F)  | Tumour, Stage                                                                   | Muscle Mass Measurement(s) | Method of Measurement       | Design                                  | Controls                     |                                                                                            |
| <b>McMillan 2001(57)</b> | 40 (40/0)  | NSCLC n=11, upper GI n=22, colon n=7.<br><br>All locally advanced or metastatic | BCM                        | Total body potassium        | Cross-sectional                         | Nil                          | The inter-relationship between albumin, body cell mass, the systemic inflammatory response |
| <b>Crown 2002 (58)</b>   | 30 (NR/NR) | NSCLC in all Inoperable, stage NR                                               | FFM, MUAC                  | BIA, upper arm measurements | Case-control, Longitudinal over 2 years | n=30 healthy volunteers (HV) | Insulin-like growth factor (ILGF) and cancer cachexia                                      |

|                                     |             |                                                                                         |           |                                    |                 |                                                                     |                                                                                                                |
|-------------------------------------|-------------|-----------------------------------------------------------------------------------------|-----------|------------------------------------|-----------------|---------------------------------------------------------------------|----------------------------------------------------------------------------------------------------------------|
| <b>Jagoe 2002 (59)</b>              | 36 (27/9)   | Mix of NSCLC and SCLC<br>Stage 1 – 21<br>Stage 2 – 6<br>Stage 3 – 6<br>Stage 4 – 2      | FFMi      | BIA, Four skinfold method, %BFMAMA | Cross-sectional | n=10 patients referred for thoracotomy for non-malignant conditions | Ubiquitin-proteasome lysosomal proteolytic pathway gene expression in and associated with LMM                  |
| <b>Wieland 2007 (60)</b>            | 286 (NR/NR) | NSCLC n=181, stage IIIB or IV                                                           | SMA at T4 | CT at T4                           | Longitudinal    | n=7 healthy volunteers                                              | Establish prevalence of proteolysis-inducing factor (PIF) in cancer patients, and association with muscle loss |
| <b>Martinez-Hernandez 2012 (61)</b> | 21 (19/2)   | Lung cancer n=13, GI cancer n=6, Other cancer n=2<br>Stage according to tumour group NR | FFM       | BIA                                | Longitudinal    | n=8 healthy volunteers                                              | The role of interleukin-15 in cachexia in cancer patients                                                      |
| <b>Op den Kamp 2012 (55)</b>        | 16 (15/1)   | NSCLC in all<br>Stage I-II – 11<br>Stage IIIA – 2<br>Stage IIIB – 3                     | FFMi      | DEXA                               | Cross-sectional | n=10 healthy volunteers                                             | Skeletal muscle mass, myofibrillar protein synthesis and ubiquitin-proteasome activity in cachexia             |

For peer review only

|                              |                   |                                                                                                                                        |            |                           |                 |                                     |                                                                                                                                      |
|------------------------------|-------------------|----------------------------------------------------------------------------------------------------------------------------------------|------------|---------------------------|-----------------|-------------------------------------|--------------------------------------------------------------------------------------------------------------------------------------|
| <b>Vigano 2009 (52)</b>      | N=172<br>(101/71) | NSCLC n=64,<br>All stage III<br>and IV.<br>Metastatic<br>GI cancer<br>n=108                                                            | LBM, ALM   | DEXA (n=64)               | Cross-sectional | Nil                                 | ACE gene<br>polymorphis<br>(insertion <sup>2</sup> -I<br>insertion/de<br>ID, deletion <sup>2</sup><br>on nutritional<br>status       |
| <b>Op den Kamp 2013 (62)</b> | 26 (17/9)         | NSCLC<br>Stage IIIB –<br>10<br>Stage IV – 16                                                                                           | FFMi, AMMi | DEXA                      | Cross-sectional | n = 10<br><br>healthy<br>volunteers | Expression o<br>signalling mo<br>in protein<br>metabolism<br>cancer cache                                                            |
| <b>Harvie 2003 (29)</b>      | 50 (32/18)        | NSCLC In all,<br>Stage III and<br>IV                                                                                                   | FFM        | Four skinfold<br>method   | Longitudinal    | Nil                                 | Exploration o<br>gender-spec<br>differences i<br>composition<br>REE pre- and<br>chemothera                                           |
| <b>Harvie 2005 (63)</b>      | 43 (28/15)        | NSCLC in all,<br>Stage III and<br>IV. Alongside<br>this<br>metastatic<br>breast and<br>melanoma<br>patients<br>evaluated<br>separately | FFM        | Four skinfold<br>method   | Longitudinal    | Nil                                 | Relationship<br>between ene<br>intake, REE a<br>acute phase<br>response vs<br>changes in b<br>composition<br>course of<br>chemothera |
| <b>Bovio 2008 (64)</b>       | 144 (92/52)       | LC n=46,<br>colon n=22,<br>HCC n=11,<br>other n=65<br><br>Stage NR                                                                     | AMA        | Upper arm<br>measurements | Cross-sectional | Nil                                 | Evaluation o<br>nutritional s<br>patients with<br>advanced ca                                                                        |
| <b>Baracos 2010 (25)</b>     | 441<br>(229/212)  | NSCLC in all<br>Stage III –<br>206                                                                                                     | SMA at L3  | CT of L3                  | Cross-sectional | Nil                                 | The use of C<br>images in<br>evaluating b<br>composition                                                                             |

|                          |                     |                                                                                                         |                 |                                          |                 |                                 |  |                                                                                                                                    |
|--------------------------|---------------------|---------------------------------------------------------------------------------------------------------|-----------------|------------------------------------------|-----------------|---------------------------------|--|------------------------------------------------------------------------------------------------------------------------------------|
|                          |                     | Stage IV –<br>235                                                                                       |                 |                                          |                 |                                 |  | NSCLC                                                                                                                              |
| <b>Martin 2013 (65)</b>  | 1473<br>(828/645)   | Colorectal cancer n=773,<br>Lung cancer n=440,<br>Other GI cancer n=260<br>Stage according to cancer NR | SMA at L3, SMAi | CT of L3                                 | Longitudinal    | Nil                             |  | Prognostic significance weight loss, mass index a muscle atter                                                                     |
| <b>Prado 2013 (66)</b>   | 368<br>(216/152)    | NSCLC n=242<br>GI tract cancer n=126                                                                    | SMA at L3       | CT of L3                                 | Longitudinal    | Nil                             |  | Clinical cour skeletal mus wasting in advanced ca                                                                                  |
| <b>Hansell 1986 (67)</b> | 98 (63/35)          | Colorectal cancer n=55,<br>Gastric cancer n=24,<br>LC n=12,<br>Other cancer n=7<br>Stage NR             | LBM, MUAC       | Tritiated saline, upper arm measurements | Cross-sectional | n=38<br>non-malignant illnesses |  | REE in weigh losing cancer patients<br>WLC = weigh losing cancer patients, WS weight-stabl cancer patie<br>WSCon = we stable contr |
| <b>Fredrix 1990</b>      | 39 (GCR<br>13/9, LC | LC n=17                                                                                                 | FFM             | BIA                                      | Cross-          | n=40                            |  | REE and wei                                                                                                                        |

|                                       |           |                                                                                                                     |           |                         |  |                     |                          |                                                                                   |
|---------------------------------------|-----------|---------------------------------------------------------------------------------------------------------------------|-----------|-------------------------|--|---------------------|--------------------------|-----------------------------------------------------------------------------------|
| (68)                                  | 16/1)     | GCR –<br>Gastric and<br>colorectal<br>cancer n=22<br><br>Stage NR                                                   |           |                         |  | sectional           | healthy                  |                                                                                   |
| <b>Staal-van den Brekel 1997 (69)</b> | 12 (10/2) | All SCLC                                                                                                            | FFM       | BIA                     |  | Longitudinal        | Nil                      | Assess REE a<br>systemic<br>inflammatio<br>and post-<br>chemothera                |
| <b>Simons 1997 (70)</b>               | 21 (21/0) | NSCLC n=19<br><br>Stage I – 3<br><br>Stage III – 5<br><br>Stage IV – 11<br><br>SCLC n=2<br><br>Limited<br>stage – 2 | FFM, FFMi | DEXA                    |  | Cross-<br>sectional | Nil                      | Relationship<br>between<br>detectable le<br>(DL) express<br>body compo<br>and REE |
| <b>Simons 1999 (71)</b>               | 20 (20/0) | NSCLC n=18<br><br>I-II – 2<br><br>III – 5<br><br>IV – 11<br><br>SCLC n=2                                            | BCM, BCMi | DEXA                    |  | Cross-<br>sectional | Nil                      | Relationship<br>between we<br>loss, low BCM<br>systemic<br>inflammatio            |
| <b>Scott 2001 (72)</b>                | 12 (12/0) | NSCLC in all,<br>locally<br>advanced                                                                                | BCM       | Total body<br>potassium |  | Longitudinal        | n=7, healthy<br>subjects | Inter-relatio<br>between sys<br>inflammatio<br>REE pre- and<br>onset of wei       |



|                                  |                                                      |                                                                                                   |                       |                                                                   |                              |                                |                                                                                                                                                         |
|----------------------------------|------------------------------------------------------|---------------------------------------------------------------------------------------------------|-----------------------|-------------------------------------------------------------------|------------------------------|--------------------------------|---------------------------------------------------------------------------------------------------------------------------------------------------------|
| <b>Jatoi 2001 (73)</b>           | 18 (10/8)                                            | NSCLC in all<br>Stage IA – 6<br>Stage IB – 3<br>Stage IIB – 3<br>Stage IIIA – 4<br>Stage IIIB – 2 | FFM, BCM, LBM         | DEXA,<br>Potassium-40,<br>tritium dilution                        | Cross-sectional              | n=18,<br>healthy<br>volunteers | REE in<br>nonmetastatic<br>NSCLC                                                                                                                        |
| <b>Jago 2001 (27)</b>            | 60 (43/17)                                           | LC in all                                                                                         | FFM, MAMC,<br>BFMAMA  | BIA, four<br>skinfold-<br>thickness, upper<br>arm<br>measurements | Cross-sectional              | n=22, mild<br>COPD             | Nutritional status<br>of patients<br>undergoing<br>cancer operation                                                                                     |
| <b>Sarhill 2003 (74)</b>         | N=352 but<br>LC only 18%<br>of cohort ( )            | NR                                                                                                | MUAC, AMA             | BIA (n=329)                                                       | Cross-sectional              | Nil                            | Prospective<br>evaluation of<br>nutritional status<br>advanced cancer                                                                                   |
| <b>Prado 2008 (1)</b>            | N=250, with<br>LC 60 (24%)<br>of cohort<br>(136/114) | TNM for<br>cohort<br>Stage I – 24<br>Stage II – 56<br>Stage III – 74<br>Stage IV – 96             | SMA and SMAi at<br>L3 | CT of L3                                                          | Cross-sectional              | Nil                            | Prevalence of<br>sarcopenia<br>and chemotherapeutic<br>toxicity in the<br>cohort<br><br>OS = obese<br>sarcopenic<br><br>ONonS = obese<br>non-sarcopenic |
| <b>Kilgour 2010 (53)</b>         | N=84, with<br>LC 16 (19%)<br>of cohort<br>(48/36)    | Metastatic<br>57%, locally<br>advanced<br>43%, stage<br>NR                                        | SMMI, ALM             | DEXA                                                              | Cross-sectional              | Nil                            | Relationship<br>fatigue to muscle<br>mass and strength                                                                                                  |
| <b>Pedley-<br/>McIntyre 2012</b> | 17 (7,10)                                            | NSCLC n=16                                                                                        | LBM, ALM              | DEXA                                                              | Longitudinal,<br>duration 10 | Nil                            | Resistance exercise<br>training efficacy                                                                                                                |

|                             |                                              |                                                                                |           |                       |                                                             |                                         |                                                                                         |
|-----------------------------|----------------------------------------------|--------------------------------------------------------------------------------|-----------|-----------------------|-------------------------------------------------------------|-----------------------------------------|-----------------------------------------------------------------------------------------|
| (56)                        |                                              | Stage I-II – 11                                                                |           |                       | weeks                                                       |                                         | and feasibility<br>lung cancer<br>survivors                                             |
|                             |                                              | Stage III – 5                                                                  |           |                       |                                                             |                                         |                                                                                         |
|                             |                                              | Limited<br>stage SCLC<br>n=1                                                   |           |                       |                                                             |                                         |                                                                                         |
| <b>Bauer 2004 (75)</b>      | N=7, with<br>NSCLC 2<br>(28.6%) of<br>cohort | Adenocarcin<br>oma<br>pancreas<br>n=5, NSCLC<br>n=2                            | LBM       | Deuterium<br>dilution | Longitudinal,<br>duration 10<br>weeks                       | Nil                                     | Effect of nut<br>counselling<br>EPA supplement<br>on body<br>composition                |
| <b>Fearon 2006<br/>(28)</b> | 518<br>(355/163)                             | LC n=231<br>Upper GI<br>cancer<br>n=198<br>Other GI<br>cancer n=89<br>Stage NR | LBM       | BIA                   | RCT (Double<br>blind, placebo<br>controlled,<br>randomised) | Nil                                     | Effect of 2g<br>doses of EPA<br>diester vs pla<br>in the proces<br>cachexia             |
| <b>Tozer 2008 (54)</b>      | 66 (49/17);<br>only 35<br>completed<br>study | All LC<br>Stage NR                                                             | BCM       | NR                    | RCT (Double<br>blind, placebo<br>controlled,<br>randomised) | Nil                                     | Effect of cys<br>rich protein<br>supplement<br>body weight<br>body cell ma              |
| <b>Murphy 2010<br/>(76)</b> | 41 (19/22)                                   | NSCLC in all<br>Stage I – 2<br>Stage II – 2<br>Stage III – 13<br>Stage IV – 24 | SMA at L3 | CT of L3              | Longitudinal,<br>cohort study<br>over 2.5<br>months         | Nil                                     | Relationship<br>between mu<br>mass, rate o<br>muscle mass<br>change, and<br>fatty acids |
| <b>Murphy 2011<br/>(77)</b> | 40 (21/19)                                   | NSCLC in all                                                                   | SMA at L3 | CT of L3              | Longitudinal,<br>duration 6                                 | Nil controls;<br>cohort<br>divided into | Effect of fish<br>(FO) on body                                                          |

|                            |                                                                |                                                                                                      |                |                                             |                                           |                                                                                        |                                                                                                    |
|----------------------------|----------------------------------------------------------------|------------------------------------------------------------------------------------------------------|----------------|---------------------------------------------|-------------------------------------------|----------------------------------------------------------------------------------------|----------------------------------------------------------------------------------------------------|
|                            |                                                                | Stage III – 13                                                                                       |                |                                             | weeks                                     | those receiving fish oil (FO) n=17 and standard care (SC) n=24                         | composition                                                                                        |
|                            |                                                                | Stage IV – 27                                                                                        |                |                                             | Open label study                          |                                                                                        |                                                                                                    |
| <b>Winter 2012 (78)</b>    | 10 (10/0)                                                      | NSCLC in all<br>Stage IIIA – 2<br>Stage IIIB – 3<br>Stage IV – 5                                     | LBM, AMMi      | DEXA                                        | Longitudinal                              | n=10 healthy men                                                                       | Effect on protein anabolism in response to hyperaminoemia, in cachectic insulin resistant patients |
| <b>Agteresch 2002 (50)</b> | N=58 (38/20)                                                   | NSCLC in all including controls (RCT).                                                               | FFM, MUAC, BCM | Four skinfold thickness, deuterium dilution | Longitudinal, duration 28 weeks           | Randomised to ATP group n=28, to control group                                         | Effect of ATP on body composition                                                                  |
|                            |                                                                | All Stage IIIB or IV, breakdown NR                                                                   |                |                                             | RCT                                       | n=30, all NSCLC                                                                        |                                                                                                    |
| <b>Beijer 2009 (79)</b>    | N=100, with LC n=44.<br><br>n=57 completed 8-week study period | LC in 44% (most frequent), colon cancer 13%, various other cancers 43%<br><br>Stage NR "preterminal" | MUAC           | Upper arm measurements                      | Longitudinal, duration 8 weeks<br><br>RCT | Baseline: ATP n=51, Standard care (SC) n=49;<br><br>Completed study: ATP n=29, SC n=28 | Effect of ATP on nutritional status and survival                                                   |

**Keys:** FFM – fat free mass, FFMI – fat free mass index, MUAC – mid upper arm circumference, TSFT – triceps skinfold thickness, AMA – Arm muscle area, BFMAMA – bone free mid arm muscle area, BCM – body cell mass, LBM – lean body mass, ALM – appendicular lean mass, AMMi – appendicular muscle mass index, SMMI – skeletal muscle mass index, SMA at L3 or T4 – skeletal muscle area at the level of the lumbar vertebra L3 or thoracic vertebra T4, SMAi – skeletal muscle area index, LC – lung cancer, NR – not recorded, NS – non significant, ILGF – insulin like growth factor, HGS = hand grip strength, QS = quadriceps strength, DL – detectable leptin, NDL – non detectable leptin. LC – lung cancer, SCLC – small cell lung cancer, NSCLC – non-small cell lung cancer, BIA – bioelectrical impedance analysis, RCT – randomised controlled trial, CT of L3 – computed tomography of the 3<sup>rd</sup> lumbar space, DEXA – dual energy xray absorptiometry, ATP – adenosine triphosphate, REE – resting energy expenditure

In this review, many studies found that those with cachexia and/or weight loss also had coexistent loss of muscle mass (25, 28, 58, 67, 68, 71, 74). Despite this, none prospectively evaluated the impact this had on cancer outcomes, specifically relating to treatment. Three studies explored the loss of muscle mass comparing men and women, finding that a significantly greater percentage of men were affected (25) (64), and that they exhibited a decreasing trend in FFM after chemotherapy compared with baseline, whereas women did not (29). Reflecting the process of loss of muscle mass in the different stages of cancer, a study of sixty pre-operative NSCLC patients with stage I and II disease showed no difference in FFM compared to controls (27), whereas in a cohort of 352 advanced cancer patients, 84% of those with cachexia had a reduced FFM (74).

The pathophysiology of loss of muscle mass in lung cancer patients is complex, as illustrated in the diversity of papers exploring this. Low FFM has been associated with low albumin and high acute phase protein concentrations (57, 58, 71), reflecting the inflammatory pathways involved. Abnormal protein metabolism is implicated in the development of sarcopenia, however in this review neither anabolic (58) nor proteolytic pathways (59) (55) had any consistent effect on loss of muscle mass. The exception to this was the lysosomal protease cathepsin-B, which was significantly increased in depleted FFM patients (59). The pathophysiology may also differ depending on disease

1  
2  
3 stage and cachexia phase. There is some evidence, for example, that in pre-cachectic NSCLC  
4  
5 patients, despite weight loss, the ubiquitin-proteasome proteolytic pathway may not be activated  
6  
7 (55, 80). Different ACE-gene polymorphism allelic combinations (52) and leptin expression (70) have  
8  
9 not been shown to have significant effects on muscle mass. Fat free mass (FFM) is the major  
10  
11 determinant of energy metabolism in humans, represented by resting energy expenditure (REE), and  
12  
13 there exists a linear relationship between REE and FFM in healthy adults (81). In lung cancer  
14  
15 cachexia, this relationship seems to be distorted (69, 71) but results have been conflicting as to  
16  
17 whether REE contributes to the development of lung cancer cachexia (67, 68, 72, 73).  
18  
19

20  
21  
22  
23  
24 The use of CT images for diagnosis of muscle mass depletion alone showed a high  
25  
26 prevalence of this phenomenon in NSCLC patients (25), regardless of BMI and even amongst the  
27  
28 obese (1). CT images were also used to chart progressive muscle loss over time, and to create a  
29  
30 prognostic model for survival based on weight loss, muscle mass and muscle attenuation (65, 66).  
31  
32 The presence of muscle mass attenuation was associated with poorer functional status and overall  
33  
34 survival.  
35  
36  
37  
38  
39  
40

41  
42  
43  
44  
45  
46  
47  
48  
49  
50  
51  
52  
53  
54  
55  
56  
57  
58  
59  
60  
61  
62  
63  
64  
65  
66  
67  
68  
69  
70  
71  
72  
73  
74  
75  
76  
77  
78  
79  
80  
81  
82  
83  
84  
85  
86  
87  
88  
89  
90  
91  
92  
93  
94  
95  
96  
97  
98  
99  
100  
101  
102  
103  
104  
105  
106  
107  
108  
109  
110  
111  
112  
113  
114  
115  
116  
117  
118  
119  
120  
121  
122  
123  
124  
125  
126  
127  
128  
129  
130  
131  
132  
133  
134  
135  
136  
137  
138  
139  
140  
141  
142  
143  
144  
145  
146  
147  
148  
149  
150  
151  
152  
153  
154  
155  
156  
157  
158  
159  
160  
161  
162  
163  
164  
165  
166  
167  
168  
169  
170  
171  
172  
173  
174  
175  
176  
177  
178  
179  
180  
181  
182  
183  
184  
185  
186  
187  
188  
189  
190  
191  
192  
193  
194  
195  
196  
197  
198  
199  
200  
201  
202  
203  
204  
205  
206  
207  
208  
209  
210  
211  
212  
213  
214  
215  
216  
217  
218  
219  
220  
221  
222  
223  
224  
225  
226  
227  
228  
229  
230  
231  
232  
233  
234  
235  
236  
237  
238  
239  
240  
241  
242  
243  
244  
245  
246  
247  
248  
249  
250  
251  
252  
253  
254  
255  
256  
257  
258  
259  
260  
261  
262  
263  
264  
265  
266  
267  
268  
269  
270  
271  
272  
273  
274  
275  
276  
277  
278  
279  
280  
281  
282  
283  
284  
285  
286  
287  
288  
289  
290  
291  
292  
293  
294  
295  
296  
297  
298  
299  
300  
301  
302  
303  
304  
305  
306  
307  
308  
309  
310  
311  
312  
313  
314  
315  
316  
317  
318  
319  
320  
321  
322  
323  
324  
325  
326  
327  
328  
329  
330  
331  
332  
333  
334  
335  
336  
337  
338  
339  
340  
341  
342  
343  
344  
345  
346  
347  
348  
349  
350  
351  
352  
353  
354  
355  
356  
357  
358  
359  
360  
361  
362  
363  
364  
365  
366  
367  
368  
369  
370  
371  
372  
373  
374  
375  
376  
377  
378  
379  
380  
381  
382  
383  
384  
385  
386  
387  
388  
389  
390  
391  
392  
393  
394  
395  
396  
397  
398  
399  
400  
401  
402  
403  
404  
405  
406  
407  
408  
409  
410  
411  
412  
413  
414  
415  
416  
417  
418  
419  
420  
421  
422  
423  
424  
425  
426  
427  
428  
429  
430  
431  
432  
433  
434  
435  
436  
437  
438  
439  
440  
441  
442  
443  
444  
445  
446  
447  
448  
449  
450  
451  
452  
453  
454  
455  
456  
457  
458  
459  
460  
461  
462  
463  
464  
465  
466  
467  
468  
469  
470  
471  
472  
473  
474  
475  
476  
477  
478  
479  
480  
481  
482  
483  
484  
485  
486  
487  
488  
489  
490  
491  
492  
493  
494  
495  
496  
497  
498  
499  
500  
501  
502  
503  
504  
505  
506  
507  
508  
509  
510  
511  
512  
513  
514  
515  
516  
517  
518  
519  
520  
521  
522  
523  
524  
525  
526  
527  
528  
529  
530  
531  
532  
533  
534  
535  
536  
537  
538  
539  
540  
541  
542  
543  
544  
545  
546  
547  
548  
549  
550  
551  
552  
553  
554  
555  
556  
557  
558  
559  
560  
561  
562  
563  
564  
565  
566  
567  
568  
569  
570  
571  
572  
573  
574  
575  
576  
577  
578  
579  
580  
581  
582  
583  
584  
585  
586  
587  
588  
589  
590  
591  
592  
593  
594  
595  
596  
597  
598  
599  
600  
601  
602  
603  
604  
605  
606  
607  
608  
609  
610  
611  
612  
613  
614  
615  
616  
617  
618  
619  
620  
621  
622  
623  
624  
625  
626  
627  
628  
629  
630  
631  
632  
633  
634  
635  
636  
637  
638  
639  
640  
641  
642  
643  
644  
645  
646  
647  
648  
649  
650  
651  
652  
653  
654  
655  
656  
657  
658  
659  
660  
661  
662  
663  
664  
665  
666  
667  
668  
669  
670  
671  
672  
673  
674  
675  
676  
677  
678  
679  
680  
681  
682  
683  
684  
685  
686  
687  
688  
689  
690  
691  
692  
693  
694  
695  
696  
697  
698  
699  
700  
701  
702  
703  
704  
705  
706  
707  
708  
709  
710  
711  
712  
713  
714  
715  
716  
717  
718  
719  
720  
721  
722  
723  
724  
725  
726  
727  
728  
729  
730  
731  
732  
733  
734  
735  
736  
737  
738  
739  
740  
741  
742  
743  
744  
745  
746  
747  
748  
749  
750  
751  
752  
753  
754  
755  
756  
757  
758  
759  
760  
761  
762  
763  
764  
765  
766  
767  
768  
769  
770  
771  
772  
773  
774  
775  
776  
777  
778  
779  
780  
781  
782  
783  
784  
785  
786  
787  
788  
789  
790  
791  
792  
793  
794  
795  
796  
797  
798  
799  
800  
801  
802  
803  
804  
805  
806  
807  
808  
809  
810  
811  
812  
813  
814  
815  
816  
817  
818  
819  
820  
821  
822  
823  
824  
825  
826  
827  
828  
829  
830  
831  
832  
833  
834  
835  
836  
837  
838  
839  
840  
841  
842  
843  
844  
845  
846  
847  
848  
849  
850  
851  
852  
853  
854  
855  
856  
857  
858  
859  
860  
861  
862  
863  
864  
865  
866  
867  
868  
869  
870  
871  
872  
873  
874  
875  
876  
877  
878  
879  
880  
881  
882  
883  
884  
885  
886  
887  
888  
889  
890  
891  
892  
893  
894  
895  
896  
897  
898  
899  
900  
901  
902  
903  
904  
905  
906  
907  
908  
909  
910  
911  
912  
913  
914  
915  
916  
917  
918  
919  
920  
921  
922  
923  
924  
925  
926  
927  
928  
929  
930  
931  
932  
933  
934  
935  
936  
937  
938  
939  
940  
941  
942  
943  
944  
945  
946  
947  
948  
949  
950  
951  
952  
953  
954  
955  
956  
957  
958  
959  
960  
961  
962  
963  
964  
965  
966  
967  
968  
969  
970  
971  
972  
973  
974  
975  
976  
977  
978  
979  
980  
981  
982  
983  
984  
985  
986  
987  
988  
989  
990  
991  
992  
993  
994  
995  
996  
997  
998  
999  
1000

Nine interventional studies explored the effect of either nutritional supplements or adenosine triphosphate (ATP) infusions on muscle mass and function. A randomised controlled study with 518 participants, examining the effect of eicosapentaenoic acid (EPA, found in fish oil) supplements revealed increased patient-rated physical functioning, but no significant change in FFM, at the end of the study period (28). A similar, smaller study of 8 participants concurred (75). By contrast, one study of fish oil supplementation demonstrated a reduction in the rate of loss of muscle mass; however study numbers were small – 40 patients in total. In addition, those considered sarcopenic were found to have lower plasma fatty acids than those without, in a study

with 41 NSCLC patients (76, 77). An interventional randomised controlled study with 66 participants found that cysteine-rich protein supplements increased FFM, as well as hand-grip strength (HGS), compared to conventional protein supplements (54), and a small case-control study with 10 patients found that hyperaminoacidaemia stimulated a normal anabolic protein response even in the presence of insulin resistance, in patients with cancer cachexia (78). Two randomised controlled studies investigating the effect of ATP infusions on body composition gave conflicting reports, one (N=58) finding that ATP slowed the rate of loss of muscle mass (50) while the other (N=100) did not (79). Only the study by Fearon et al (28) described power calculations to detect a statistically significant difference.

*Degree of sarcopenia or loss of muscle mass and physical functioning*

Table 3: Degree of loss of muscle mass and physical functioning

| Authors                 | Patients      |                                               | Muscle Function and Muscle Mass Measurements | Method of Measurement                                | Study                                              |                 | Comparison                                                              |
|-------------------------|---------------|-----------------------------------------------|----------------------------------------------|------------------------------------------------------|----------------------------------------------------|-----------------|-------------------------------------------------------------------------|
|                         | No, (M/F)     | Tumour, Stage                                 |                                              |                                                      | Design                                             | Controls        |                                                                         |
| <b>Jagoe 2001 (27)</b>  | 60 (43/17)    | LC in all                                     | Grip strength Z-score                        | HDA dynamometer                                      | Cross-sectional                                    | n=22, mild COPD | Nutritional status of patients undergoing cancer operation              |
| <b>Fearon 2006 (28)</b> | 518 (355/163) | LC n=231<br>Upper GI cancer n=198<br>Other GI | LBM                                          | BIA, four skinfold-thickness, upper arm measurements | RCT (Double blind, placebo controlled, randomised) | Nil             | Effect of 2g doses of EPA diester vs placebo in the process of cachexia |

|                              |                                                                                |                                                                                                          |                                                                                                          |                                                                                                        |                                                             |     |                                                                                                                     |  |
|------------------------------|--------------------------------------------------------------------------------|----------------------------------------------------------------------------------------------------------|----------------------------------------------------------------------------------------------------------|--------------------------------------------------------------------------------------------------------|-------------------------------------------------------------|-----|---------------------------------------------------------------------------------------------------------------------|--|
|                              |                                                                                |                                                                                                          | cancer n=89                                                                                              |                                                                                                        |                                                             |     |                                                                                                                     |  |
|                              |                                                                                |                                                                                                          | Stage NR                                                                                                 |                                                                                                        |                                                             |     |                                                                                                                     |  |
| <b>Tozer 2008 (54)</b>       | 66<br>(49/17);<br>only 35<br>completed<br>study                                | All LC<br><br>Stage NR                                                                                   | BCM                                                                                                      | NR                                                                                                     | RCT (Double<br>blind, placebo<br>controlled,<br>randomised) | Nil | Effect of cyste<br>rich protein<br>supplement<br>body weight<br>body cell ma                                        |  |
| <b>Trutschnigg 2008 (17)</b> | 81<br>(NR/NR)<br><br>74<br>completed<br>muscle<br>function<br>tests<br>(48/26) | Advanced<br>NSCLC and<br>Gastro-<br>intestinal<br>cancer<br>patients,<br>breakdown<br>NR<br><br>Stage NR | Handgrip strength<br><br>In Newton metre<br>for Biodex, and<br>pounds for Jamar                          | Jamar and<br>Biodex<br>dynamometer<br>(n=74<br>completed)<br><br><br><br>DEXA, BIA (n=70<br>completed) | Cross-<br>sectional                                         | Nil | Relationship<br>between DE<br>BIA, and Jamar<br>Biodex<br>dynamomet<br>their precisio<br>advanced ca<br>patients    |  |
| <b>Kilgour 2010 (53)</b>     | N=84, with<br>LC 16<br>(19%) of<br>cohort<br>(48/36)                           | Metastatic<br>57%, locally<br>advanced<br>43%, stage<br>NR                                               | Handgrip strength<br>(HGS) in kg,<br>Quadriceps<br>strength (QS) in<br>Newton metre<br><br><br>SMMI, ALM | Jamar (HGS)<br>and Biodex (QS)<br><br><br><br>DEXA                                                     | Cross-<br>sectional                                         | Nil | Relationship<br>fatigue to m<br>mass and str                                                                        |  |
| <b>Vigano 2009 (52)</b>      | N=172<br>(101/71)                                                              | NSCLC n=64,<br>Stage III and<br>IV,<br>breakdown<br>NR                                                   | Handgrip force and<br>percentile                                                                         | Jamar<br>dynamometer                                                                                   | Cross-<br>sectional                                         | Nil | ACE gene<br>polymorphis<br>(insertion <sup>2</sup> -I<br>insertion/de<br>ID, deletion <sup>2</sup><br>on nutritiona |  |

|                                              |           | Metastatic<br>GI cancer<br>n=108                                                                             | LBM, ALM                                                                                                                                                                   | DEXA (n=64)                                                     |                                       |                                 | status                                                                  |
|----------------------------------------------|-----------|--------------------------------------------------------------------------------------------------------------|----------------------------------------------------------------------------------------------------------------------------------------------------------------------------|-----------------------------------------------------------------|---------------------------------------|---------------------------------|-------------------------------------------------------------------------|
| <b>Peddle-<br/>McIntyre 2012<br/>(56)</b>    | 17 (7,10) | NSCLC n=16<br>Stage I-II –11<br>Stage III – 5<br>Limited<br>stage SCLC<br>n=1                                | Chest press, Leg<br>press, functional<br>performance<br>measure [6MWD –<br>six minute walk<br>distance, Get-up-<br>and-go (GUAG),<br>chair stands and<br>arm curls in 30s] | 1 Repetition-<br>maximum<br>(1RM) in kg                         | Longitudinal,<br>duration 10<br>weeks | Nil                             | Resistance e<br>training effi<br>and feasil<br>lung cancer<br>survivors |
|                                              |           |                                                                                                              | LBM, ALM                                                                                                                                                                   | DEXA                                                            |                                       |                                 |                                                                         |
| <b>Martinez-<br/>Hernandez<br/>2012 (61)</b> | 21 (19/2) | Lung cancer<br>n=13, GI<br>cancer n=6,<br>Other cancer<br>n=2<br>Stage<br>according to<br>tumour<br>group NR | Handgrip strength<br>(HGS) and treadmill<br>6 minute walk test<br>(6MWT)<br>FFM                                                                                            | BIA                                                             | Longitudinal                          | n=8 healthy<br>volunteers       | The role of<br>interleukin-1<br>15) in cachex<br>cancer patie           |
| <b>Op den Kamp<br/>2012 (55)</b>             | 16 (15/1) | NSCLC in all<br>Stage I-II –11<br>Stage IIIA – 2<br>Stage IIIB – 3                                           | Intensity of physical<br>activity<br>FFMi                                                                                                                                  | Triaxial<br>accelerometer<br>(Tracmor) in<br>counts/min<br>DEXA | Cross-<br>sectional                   | n=10<br>healthy<br>volunteers   | Skeletal mus<br>ubiquitin<br>proteasome<br>activity in pr<br>cachexia   |
| <b>Op den Kamp<br/>2013 (62)</b>             | 26 (17/9) | NSCLC<br>Stage IIIB –<br>10                                                                                  | Quadriceps<br>strength (QS)                                                                                                                                                | DEXA                                                            | Cross-<br>sectional                   | n = 10<br>healthy<br>volunteers | Expression o<br>signalling mo<br>in protein<br>metabolism               |



Stage IV – 16 FFMi, AMMi

cancer cachexia

Keys: : FFM – fat free mass, FFMi – fat free mass index, MUAC – mid upper arm circumference, TSFT – triceps skinfold thickness, AMA – Arm muscle area, BFMAMA – bone free mid arm muscle area, BCM – body cell mass, LBM – lean body mass, ALM – appendicular lean mass, SMMI – skeletal muscle mass index, SMA – skeletal muscle area, LC – lung cancer, NR – not recorded, NS – non significant, HGS – handgrip strength, QS – quadriceps strength, LC – lung cancer, NSCLC – non-small cell lung cancer, SCLC – small cell lung cancer, EPA – eicosapentaenoic acid, DEXA – dual energy xray absorptiometry, BIA – bioelectrical impedance analysis, ACE – angiotensin converting enzyme.

There was very little direct evaluation of the relationship between muscle mass and muscle function. However, the studies that evaluated muscle mass alongside muscle function show that there is limited correlation. Muscle strength seemed to be affected, regardless of loss of muscle mass. In pre-cachectic patients, exercise capacity was significantly reduced, despite maintenance of muscle mass (55), and resistance exercise training increased all parameters of muscle strength and physical performance, with no difference to muscle mass (56). In this review, cachectic patients showed reduced strength in terms of walking distance (61) and quadriceps strength (62) compared to controls.

## Discussion

Loss of muscle mass, as part of a weight-losing syndrome, is a central feature of cancer cachexia. However, changes in muscle mass, and/or performance, may pre-date clinically overt cachexia, as part of aging or secondary to inflammation/disuse. This implies that consideration of both muscle mass and function, rather than weight loss alone, is clinically important. Understanding this relationship, and the factors associated with each, will provide opportunities for focused intervention to improve clinical outcomes.

1  
2  
3 The findings of our review highlight several important issues. Whilst studies exploring  
4  
5 molecular and metabolic factors associated with loss of muscle mass have contributed to a better  
6  
7 understanding of the pathophysiology of cancer cachexia, there remains considerable uncertainty in  
8  
9 relation to mechanisms. Our review in lung cancer patients demonstrates inconsistency of findings  
10  
11 as to the factors implicated in the development of cachexia, compared to other cancer sites. It  
12  
13 highlights the lack of clear therapeutic targets and emphasises the need for concerted,  
14  
15 appropriately-sized exploration of predictive and prognostic factors in lung cancer cachexia.  
16  
17  
18  
19  
20  
21

22 This uncertainty with regard to precise pathophysiological mechanisms is reflected in the  
23  
24 lack of consistent effect of interventions aimed at slowing the rate of loss of muscle mass and  
25  
26 improving muscle function in lung cancer. Studies reviewed which refer to cachexia management  
27  
28 support a multimodal approach, including targeted exercise, nutritional counselling, social support  
29  
30 and pharmacological intervention (82). This review highlights inherent challenges of such an  
31  
32 approach, with nutritional interventions in particular failing to demonstrate efficacy altho(83),ugh  
33  
34 the role of exercise is emerging (56, 84). It also suggests the need to represent NSCLC patients  
35  
36 adequately within trials of new interventions, such as myostatin antibody therapies, rather than  
37  
38 assuming a class effect across tumour sites.  
39  
40  
41  
42  
43  
44

45 Strikingly, our review has demonstrated that, to date, there has not been due attention to  
46  
47 the concept of sarcopenia as a distinct, if overlapping syndrome, in a condition affecting a largely  
48  
49 elderly population. It also highlights the difficulty in making comparisons between studies, due to  
50  
51 the heterogeneity of methods employed in measuring muscle mass, and in cut-off values for defining  
52  
53 sarcopenia. Current standardised values were derived from a large elderly cohort and the cut-off  
54  
55 values based on healthy young adult reference values. These values have been used to define  
56  
57  
58  
59  
60

1  
2  
3 sarcopenia in cancer (13, 85), including one in this review (53). The relevance of this definition to  
4  
5 cancer patients is debatable, for a number of reasons. Firstly, sarcopenia manifests in cancer  
6  
7 patients of all ages and is not isolated to the elderly alone. Secondly, the pathophysiology of  
8  
9 sarcopenia in cancer patients may differ at least in part to that of the non-cancer elderly population  
10  
11 (86). With this in mind, the more recent international consensus document recommending a  
12  
13 reference value of absolute muscularity below the 5<sup>th</sup> centile is to be welcomed (13). Finally, the  
14  
15 recognition of muscle strength and performance as a defining component of sarcopenia in the  
16  
17 elderly needs consideration, within the context of cancer cachexia.  
18  
19  
20  
21  
22  
23

24 The argument for the objective evaluation of physical performance is pertinent, particularly  
25  
26 as part of the definitive assessment of sarcopenia alongside measurements of muscle mass.  
27  
28 Currently, physical fitness for treatment is determined largely by the performance status (PS) score.  
29  
30 This score is imperfect as it is subjective, with reports of inter-observer variability (87), and there is  
31  
32 only a modest correlation between PS and observed physical performance (88). Inter-clinician  
33  
34 performance status discordance has led to a lower percentage of PS 0 and 1 patients appearing to  
35  
36 get chemotherapy (89), and has led to a call for objective evaluation of physical functioning (90).  
37  
38 Some proposed methods include tests of gait speed and muscle strength. It is postulated that  
39  
40 objective measures of muscle mass and strength together may complement, or even outperform  
41  
42 performance status as a predictor of fitness for systemic treatment, provided that they can be  
43  
44 readily performed in routine clinical settings..  
45  
46  
47  
48  
49  
50  
51

52 Our review has several limitations. The heterogeneity of the studies included in this review  
53  
54 made it difficult to account for individual risk of bias, not least because we included a broad range of  
55  
56 studies from large randomised controlled trials to small observational studies. This limitation also  
57  
58  
59  
60

1  
2  
3 means that some papers included in this review, whilst being relevant to sarcopenia, were more  
4  
5 broadly related to muscle mass outcomes in cancer cachexia, rather than assessing sarcopenia  
6  
7 directly. Our search also was limited to studies published in English, and although our review  
8  
9 included some studies with negative or inconclusive findings, there may indeed exist some  
10  
11 publication bias for which we are unable to account.  
12  
13

14  
15  
16  
17  
18 The paper by Temel et al, which demonstrated that early palliative care involvement  
19  
20 increased patient survival, as well as quality of life, has highlighted the importance of supportive  
21  
22 measures in a poor-prognosis population receiving active oncological intervention (91). As such,  
23  
24 focusing research on the identification and management of sarcopenia in lung cancer patients may  
25  
26 prove to be a tolerable and cost effective adjunct to current lung cancer care.  
27  
28

29  
30  
31  
32 Whilst development of a clearer definition of cancer cachexia provides an additional  
33  
34 component of a robust, objective clinical framework for stratification of patients for focused  
35  
36 interventions, the enhanced role of muscle strength/performance as a defining assessment of  
37  
38 sarcopenia requires attention. A standardised definition of cancer-related sarcopenia which can be  
39  
40 used clinically and in the research setting will harmonise reporting, allowing for direct comparison of  
41  
42 results as well as meta-analysis of data. In the era of stratified medicine, this review identifies  
43  
44 opportunities to examine cellular and genetic factors associated with sarcopenia in lung cancer  
45  
46 coherently and to link them with changes in tumour phenotype which impact on morbidity and  
47  
48 survival.  
49  
50  
51  
52  
53  
54  
55  
56  
57  
58  
59  
60

### Acknowledgements

Jemima Collins is funded by Cardiff and Vale University Health Board under the Clinical Research Fellowship scheme.

### Contributorship Statement

JC and SN were responsible for the conception and design of this review.

JC and BC conducted the searches.

JC and SN independently reviewed the citations, and were responsible for analysing and interpreting the data.

SN, JDC and AB and JC drafted the article and revised its content to its final version.

### Data Sharing Statement

No additional data

### Conflict of interest statement

None declared.

### Figure legend

shows a breakdown of the results of our search using the search terms used, and the derivation of papers for final analysis.

## References

1. Prado CM, Lieffers JR, McCargar LJ, et al. Prevalence and clinical implications of sarcopenic obesity in patients with solid tumours of the respiratory and gastrointestinal tracts: a population-based study. *The lancet oncology*. 2008 Jul;9(7):629-35. PubMed PMID: 18539529.
2. Prado CM, Baracos VE, McCargar LJ, et al. Sarcopenia as a determinant of chemotherapy toxicity and time to tumor progression in metastatic breast cancer patients receiving capecitabine treatment. *Clinical cancer research : an official journal of the American Association for Cancer Research*. 2009 Apr 15;15(8):2920-6. PubMed PMID: 19351764. Epub 2009/04/09. eng.
3. Awad S, Tan BH, Cui H, et al. Marked changes in body composition following neoadjuvant chemotherapy for oesophagogastric cancer. *Clinical nutrition (Edinburgh, Scotland)*. 2012 Feb;31(1):74-7. PubMed PMID: 21875767. Epub 2011/08/31. eng.
4. Mir O, Coriat R, Blanchet B, et al. Sarcopenia predicts early dose-limiting toxicities and pharmacokinetics of sorafenib in patients with hepatocellular carcinoma. *PloS one*. 2012;7(5):e37563. PubMed PMID: 22666367. Pubmed Central PMCID: PMC3364283. Epub 2012/06/06. eng.
5. Lieffers JR, Bathe OF, Fassbender K, et al. Sarcopenia is associated with postoperative infection and delayed recovery from colorectal cancer resection surgery. *British journal of cancer*. 2012 Sep 4;107(6):931-6. PubMed PMID: 22871883. Pubmed Central PMCID: PMC3464761. Epub 2012/08/09. eng.
6. Cruz-Jentoft AJ, Baeyens JP, Bauer JM, et al. Sarcopenia: European consensus on definition and diagnosis: Report of the European Working Group on Sarcopenia in Older People. *Age and ageing*. 2010 Jul;39(4):412-23. PubMed PMID: 20392703. Pubmed Central PMCID: PMC2886201. Epub 2010/04/16. eng.
7. Janssen I, Heymsfield SB, Ross R. Low relative skeletal muscle mass (sarcopenia) in older persons is associated with functional impairment and physical disability. *Journal of the American Geriatrics Society*. 2002 May;50(5):889-96. PubMed PMID: 12028177. Epub 2002/05/25. eng.
8. Baumgartner RN, Koehler KM, Gallagher D, et al. Epidemiology of sarcopenia among the elderly in New Mexico. *American journal of epidemiology*. 1998 Apr 15;147(8):755-63. PubMed PMID: 9554417. Epub 1998/04/29. eng.
9. Landi F, Liperoti R, Fusco D, et al. Sarcopenia and mortality among older nursing home residents. *Journal of the American Medical Directors Association*. 2012 Feb;13(2):121-6. PubMed PMID: 21856243. Epub 2011/08/23. eng.
10. Cherin P, Voronska E, Fraoucene N, et al. Prevalence of sarcopenia among healthy ambulatory subjects: the sarcopenia begins from 45 years. *Aging clinical and experimental research*. 2013 Oct 16. PubMed PMID: 24129803. Epub 2013/10/17. Eng.
11. Veasey-Rodrigues H, Parsons HA, Janku F, et al. A pilot study of temsirolimus and body composition. *J Cachexia Sarcopenia Muscle*. 2013 Jul 27. PubMed PMID: 23893509. Epub 2013/07/31. Eng.
12. Harimoto N, Shirabe K, Yamashita YI, et al. Sarcopenia as a predictor of prognosis in patients following hepatectomy for hepatocellular carcinoma. *The British journal of surgery*. 2013 Oct;100(11):1523-30. PubMed PMID: 24037576. Epub 2013/09/17. eng.

- 1  
2  
3 13. Fearon K, Strasser F, Anker SD, et al. Definition and classification of cancer cachexia: an  
4 international consensus. *The lancet oncology*. 2011 May;12(5):489-95. PubMed PMID: 21296615.  
5 Epub 2011/02/08. eng.
- 6 14. Janssen I, Baumgartner RN, Ross R, et al. Skeletal muscle cutpoints associated with elevated  
7 physical disability risk in older men and women. *American journal of epidemiology*. 2004 Feb  
8 15;159(4):413-21. PubMed PMID: 14769646. Epub 2004/02/11. eng.
- 9 15. Goodpaster BH, Park SW, Harris TB, et al. The loss of skeletal muscle strength, mass, and  
10 quality in older adults: the health, aging and body composition study. *The journals of gerontology*  
11 *Series A, Biological sciences and medical sciences*. 2006 Oct;61(10):1059-64. PubMed PMID:  
12 17077199. Epub 2006/11/02. eng.
- 13 16. Kendler DL, Borges JL, Fielding RA, et al. The Official Positions of the International Society for  
14 Clinical Densitometry: Indications of Use and Reporting of DXA for Body Composition. *Journal of*  
15 *clinical densitometry : the official journal of the International Society for Clinical Densitometry*. 2013  
16 Oct-Dec;16(4):496-507. PubMed PMID: 24090645. Epub 2013/10/05. eng.
- 17 17. Trutschnigg B, Kilgour RD, Reinglas J, et al. Precision and reliability of strength (Jamar vs.  
18 Biodex handgrip) and body composition (dual-energy X-ray absorptiometry vs. bioimpedance  
19 analysis) measurements in advanced cancer patients. *Applied physiology, nutrition, and metabolism*  
20 = *Physiologie appliquee, nutrition et metabolisme*. 2008 Dec;33(6):1232-9. PubMed PMID:  
21 19088782.
- 22 18. Landi F, Russo A, Liperoti R, et al. Midarm muscle circumference, physical performance and  
23 mortality: results from the aging and longevity study in the Sirente geographic area (iSIRENTE  
24 study). *Clinical nutrition (Edinburgh, Scotland)*. 2010 Aug;29(4):441-7. PubMed PMID: 20116909.  
25 Epub 2010/02/02. eng.
- 26 19. Freiburger E, de Vreede P, Schoene D, et al. Performance-based physical function in older  
27 community-dwelling persons: a systematic review of instruments. *Age and ageing*. 2012  
28 Nov;41(6):712-21. PubMed PMID: 22885845. Epub 2012/08/14. eng.
- 29 20. Greendale GA, DeAmicis TA, Bucur A, et al. A prospective study of the effect of fracture on  
30 measured physical performance: results from the MacArthur Study--MAC. *Journal of the American*  
31 *Geriatrics Society*. 2000 May;48(5):546-9. PubMed PMID: 10811548. Epub 2000/05/16. eng.
- 32 21. Ferlay J, Shin HR, Bray F, et al. Estimates of worldwide burden of cancer in 2008: GLOBOCAN  
33 2008. *International journal of cancer Journal international du cancer*. 2010 Dec 15;127(12):2893-  
34 917. PubMed PMID: 21351269. Epub 2011/02/26. eng.
- 35 22. Rachet B, Woods LM, Mitry E, et al. Cancer survival in England and Wales at the end of the  
36 20th century. *British journal of cancer*. 2008 Sep 23;99 Suppl 1:S2-10. PubMed PMID: 18813248.  
37 PubMed Central PMCID: PMC2557545. Epub 2008/10/01. eng.
- 38 23. Vinod SK, Sidhom MA, Gabriel GS, et al. Why do some lung cancer patients receive no  
39 anticancer treatment? *Journal of thoracic oncology : official publication of the International*  
40 *Association for the Study of Lung Cancer*. 2010 Jul;5(7):1025-32. PubMed PMID: 20453689. Epub  
41 2010/05/11. eng.
- 42 24. Pemberton L, Sumra P, Tetlow C, et al. Do treatment decisions made at lung cancer multi-  
43 disciplinary team meetings (MDTs) reflect the actual treatment given in practice? *Lung cancer*  
44 (Amsterdam, Netherlands). 2013;79:S36.
- 45 25. Baracos VE, Reiman T, Mourtzakis M, et al. Body composition in patients with non-small cell  
46 lung cancer: a contemporary view of cancer cachexia with the use of computed tomography image  
47 analysis. *The American journal of clinical nutrition*. 2010 Apr;91(4):1133S-7S. PubMed PMID:  
48 20164322.
- 49 26. Villasenor A, Ballard-Barbash R, Baumgartner K, et al. Prevalence and prognostic effect of  
50 sarcopenia in breast cancer survivors: the HEAL Study. *Journal of cancer survivorship : research and*  
51 *practice*. 2012 Dec;6(4):398-406. PubMed PMID: 23054848. Epub 2012/10/12. eng.
- 52  
53  
54  
55  
56  
57  
58  
59  
60

- 1  
2  
3 27. Jagoe RT, Goodship TH, Gibson GJ. Nutritional status of patients undergoing lung cancer  
4 operations. *The Annals of thoracic surgery*. 2001 Mar;71(3):929-35. PubMed PMID: 11269476. Epub  
5 2001/03/28. eng.
- 6 28. Fearon KC, Barber MD, Moses AG, et al. Double-blind, placebo-controlled, randomized study  
7 of eicosapentaenoic acid diester in patients with cancer cachexia. *Journal of clinical oncology :*  
8 *official journal of the American Society of Clinical Oncology*. 2006 Jul 20;24(21):3401-7. PubMed  
9 PMID: 16849754. Epub 2006/07/20. eng.
- 10 29. Harvie MN, Campbell IT, Thatcher N, et al. Changes in body composition in men and women  
11 with advanced nonsmall cell lung cancer (NSCLC) undergoing chemotherapy. *Journal of human*  
12 *nutrition and dietetics : the official journal of the British Dietetic Association*. 2003 Oct;16(5):323-6.  
13 PubMed PMID: 14516379. Epub 2003/10/01. eng.
- 14 30. Sanchez-Lara K, Turcott JG, Juarez E, et al. Association of nutrition parameters including  
15 bioelectrical impedance and systemic inflammatory response with quality of life and prognosis in  
16 patients with advanced non-small-cell lung cancer: a prospective study. *Nutrition and cancer*.  
17 2012;64(4):526-34. PubMed PMID: 22489794. Epub 2012/04/12. eng.
- 18 31. Granger CL, McDonald CF, Parry SM, et al. Functional capacity, physical activity and muscle  
19 strength assessment of individuals with non-small cell lung cancer: a systematic review of  
20 instruments and their measurement properties. *BMC cancer*. 2013;13:135. PubMed PMID:  
21 23514337. Pubmed Central PMCID: PMC3623892. Epub 2013/03/22. eng.
- 22 32. Blum D, Omlin A, Baracos VE, et al. Cancer cachexia: a systematic literature review of items  
23 and domains associated with involuntary weight loss in cancer. *Critical reviews in*  
24 *oncology/hematology*. 2011 Oct;80(1):114-44. PubMed PMID: 21216616.
- 25 33. Bruera E, Ernst S, Hagen N, et al. Effectiveness of megestrol acetate in patients with  
26 advanced cancer: A randomized, double-blind, crossover study. *Cancer Prevention and Control*.  
27 1998;2(2):74-8. PubMed PMID: 1998162517.
- 28 34. Lindsey AM, Piper BF. Anorexia and weight loss: indicators of cachexia in small cell lung  
29 cancer. *Nutrition and cancer*. 1985;7(1-2):65-76. PubMed PMID: 2999721.
- 30 35. Wolf RF, Pearlstone DB, Newman E, et al. Growth hormone and insulin reverse net whole  
31 body and skeletal muscle protein catabolism in cancer patients. *Annals of Surgery*. 1992;216(3):280-  
32 90. PubMed PMID: 1992302056.
- 33 36. Gioulbasanis I, Baracos VE, Giannousi Z, et al. Baseline nutritional evaluation in metastatic  
34 lung cancer patients: Mini Nutritional Assessment versus weight loss history. *Annals of oncology :*  
35 *official journal of the European Society for Medical Oncology / ESMO*. 2011 Apr;22(4):835-41.  
36 PubMed PMID: 20937647. Epub 2010/10/13. eng.
- 37 37. Jamieson NB, Brown DJ, Michael Wallace A, et al. Adiponectin and the systemic  
38 inflammatory response in weight-losing patients with non-small cell lung cancer. *Cytokine*. 2004 Jul  
39 21-Aug 7;27(2-3):90-2. PubMed PMID: 15242698. Epub 2004/07/10. eng.
- 40 38. Melville S, McNurlan MA, Calder AG, et al. Increased protein turnover despite normal energy  
41 metabolism and responses to feeding in patients with lung cancer. *Cancer research*. 1990 Feb  
42 15;50(4):1125-31. PubMed PMID: 2297761. Epub 1990/02/15. eng.
- 43 39. Richards EW, Long CL, Nelson KM, et al. Protein turnover in advanced lung cancer patients.  
44 *Metabolism: clinical and experimental*. 1993 Mar;42(3):291-6. PubMed PMID: 8487646. Epub  
45 1993/03/01. eng.
- 46 40. Staal-van den Brekel AJ, Schols AM, Dentener MA, et al. Metabolism in patients with small  
47 cell lung carcinoma compared with patients with non-small cell lung carcinoma and healthy controls.  
48 *Thorax*. 1997 Apr;52(4):338-41. PubMed PMID: 9196516. Pubmed Central PMCID: PMC1758535.  
49 Epub 1997/04/01. eng.
- 50 41. Staal-van den Brekel AJ, Schols AM, ten Velde GP, et al. Analysis of the energy balance in  
51 lung cancer patients. *Cancer research*. 1994 Dec 15;54(24):6430-3. PubMed PMID: 7987838. Epub  
52 1994/12/15. eng.
- 53  
54  
55  
56  
57  
58  
59  
60



- 1  
2  
3 42. van der Meij BS, Schoonbeek CP, Smit EF, et al. Pre-cachexia and cachexia at diagnosis of  
4 stage III non-small-cell lung carcinoma: an exploratory study comparing two consensus-based  
5 frameworks. *The British journal of nutrition*. 2012 Nov 16;16:1-9. PubMed PMID: 23153477. Epub  
6 2012/11/17. Eng.
- 7 43. Ovesen L, Hannibal J, Mortensen EL. The interrelationship of weight loss, dietary intake, and  
8 quality of life in ambulatory patients with cancer of the lung, breast, and ovary. *Nutrition and cancer*.  
9 1993;19(2):159-67. PubMed PMID: 8502586. Epub 1993/01/01. eng.
- 10 44. Richards EW, Long CL, Nelson KM, et al. Glucose metabolism in advanced lung cancer  
11 patients. *Nutrition (Burbank, Los Angeles County, Calif)*. 1992 Jul-Aug;8(4):245-51. PubMed PMID:  
12 1498456. Epub 1992/07/01. eng.
- 13 45. Simons JP, Schols AM, Westerterp KR, et al. The use of bioelectrical impedance analysis to  
14 predict total body water in patients with cancer cachexia. *The American journal of clinical nutrition*.  
15 1995 Apr;61(4):741-5. PubMed PMID: 7702014.
- 16 46. Arrieta O, Michel Ortega RM, Villanueva-Rodriguez G, et al. Association of nutritional status  
17 and serum albumin levels with development of toxicity in patients with advanced non-small cell lung  
18 cancer treated with paclitaxel-cisplatin chemotherapy: a prospective study. *BMC cancer*. 2010;10:50.  
19 PubMed PMID: 20170547. Pubmed Central PMCID: PMC2843671. Epub 2010/02/23. eng.
- 20 47. Jatoi A, Ritter HL, Dueck A, et al. A placebo-controlled, double-blind trial of infliximab for  
21 cancer-associated weight loss in elderly and/or poor performance non-small cell lung cancer patients  
22 (N01C9). *Lung cancer*. 2010 May;68(2):234-9. PubMed PMID: 19665818. Epub 2009/08/12. eng.
- 23 48. Meek CL, Wallace AM, Forrest LM, et al. The relationship between the insulin-like growth  
24 factor-1 axis, weight loss, an inflammation-based score and survival in patients with inoperable non-  
25 small cell lung cancer. *Clinical nutrition (Edinburgh, Scotland)*. 2010 Apr;29(2):206-9. PubMed PMID:  
26 19748165. Epub 2009/09/15. eng.
- 27 49. Toso S, Piccoli A, Gusella M, et al. Altered tissue electric properties in lung cancer patients as  
28 detected by bioelectric impedance vector analysis. *Nutrition (Burbank, Los Angeles County, Calif)*.  
29 2000 Feb;16(2):120-4. PubMed PMID: 10696635. Epub 2000/03/04. eng.
- 30 50. Agteresch HJ, Rietveld T, Kerkhofs LG, et al. Beneficial effects of adenosine triphosphate on  
31 nutritional status in advanced lung cancer patients: a randomized clinical trial. *Journal of clinical  
32 oncology : official journal of the American Society of Clinical Oncology*. 2002 Jan 15;20(2):371-8.  
33 PubMed PMID: 11786563. Epub 2002/01/12. eng.
- 34 51. Dagnelie PC, Agteresch HJ. Promising effects of adenosine triphosphate infusion on  
35 nutritional status and quality of life in advanced non-small-cell lung cancer: A randomized clinical  
36 trial. *Drug Development Research*. 2003 01 May;59(1):146-51. PubMed PMID: 2003229377.
- 37 52. Vigano A, Trutschnigg B, Kilgour RD, et al. Relationship between angiotensin-converting  
38 enzyme gene polymorphism and body composition, functional performance, and blood biomarkers  
39 in advanced cancer patients. *Clinical cancer research : an official journal of the American Association  
40 for Cancer Research*. 2009 Apr 1;15(7):2442-7. PubMed PMID: 19258445.
- 41 53. Kilgour RD, Vigano A, Trutschnigg B, et al. Cancer-related fatigue: The impact of skeletal  
42 muscle mass and strength in patients with advanced cancer. *Journal of Cachexia, Sarcopenia and  
43 Muscle*. 2010 December;1(2):177-85. PubMed PMID: 2012370684.
- 44 54. Tozer RG, Tai P, Falconer W, et al. Cysteine-rich protein reverses weight loss in lung cancer  
45 patients receiving chemotherapy or radiotherapy. *Antioxidants & redox signaling*. 2008  
46 Feb;10(2):395-402. PubMed PMID: 18158761. Epub 2007/12/27. eng.
- 47 55. Op den Kamp CM, Langen RC, Minnaard R, et al. Pre-cachexia in patients with stages I-III  
48 non-small cell lung cancer: Systemic inflammation and functional impairment without activation of  
49 skeletal muscle ubiquitin proteasome system. *Lung cancer*. 2012 April;76(1):112-7. PubMed PMID:  
50 2012141803.
- 51 56. Peddle-McIntyre CJ, Bell G, Fenton D, et al. Feasibility and preliminary efficacy of progressive  
52 resistance exercise training in lung cancer survivors. *Lung cancer*. 2012 Jan;75(1):126-32. PubMed  
53 PMID: 21715041.
- 54  
55  
56  
57  
58  
59  
60

- 1  
2  
3 57. McMillan DC, Watson WS, O'Gorman P, et al. Albumin concentrations are primarily  
4 determined by the body cell mass and the systemic inflammatory response in cancer patients with  
5 weight loss. *Nutrition and cancer*. 2001;39(2):210-3. PubMed PMID: 11759282. Epub 2002/01/05.  
6 eng.
- 7 58. Crown AL, Cottle K, Lightman SL, et al. What is the role of the insulin-like growth factor  
8 system in the pathophysiology of cancer cachexia, and how is it regulated? *Clinical Endocrinology*.  
9 2002;56(6):723-33. PubMed PMID: 2002261382.
- 10 59. Jagoe RT, Redfern CP, Roberts RG, et al. Skeletal muscle mRNA levels for cathepsin B, but not  
11 components of the ubiquitin-proteasome pathway, are increased in patients with lung cancer  
12 referred for thoracotomy. *Clinical science*. 2002 Mar;102(3):353-61. PubMed PMID: 11869177.
- 13 60. Wieland BM, Stewart GD, Skipworth RJ, et al. Is there a human homologue to the murine  
14 proteolysis-inducing factor? *Clinical cancer research : an official journal of the American Association  
15 for Cancer Research*. 2007 Sep 1;13(17):4984-92. PubMed PMID: 17785548. Epub 2007/09/06. eng.
- 16 61. Martinez-Hernandez PL, Hernanz-Macias A, Gomez-Candela C, et al. Serum interleukin-15  
17 levels in cancer patients with cachexia. *Oncology reports*. 2012 Oct;28(4):1443-52. PubMed PMID:  
18 22825570. Epub 2012/07/25. eng.
- 19 62. Op den Kamp CM, Langen RC, Snepvangers FJ, et al. Nuclear transcription factor kappa B  
20 activation and protein turnover adaptations in skeletal muscle of patients with progressive stages of  
21 lung cancer cachexia. *The American journal of clinical nutrition*. 2013 Sep;98(3):738-48. PubMed  
22 PMID: 23902785. Epub 2013/08/02. eng.
- 23 63. Harvie MN, Howell A, Thatcher N, et al. Energy balance in patients with advanced NSCLC,  
24 metastatic melanoma and metastatic breast cancer receiving chemotherapy--a longitudinal study.  
25 *British journal of cancer*. 2005 Feb 28;92(4):673-80. PubMed PMID: 15726121. Pubmed Central  
26 PMCID: PMC2361878. Epub 2005/02/24. eng.
- 27 64. Bovio G, Bettaglio R, Bonetti G, et al. Evaluation of nutritional status and dietary intake in  
28 patients with advanced cancer on palliative care. *Minerva gastroenterologica e dietologica*. 2008  
29 Sep;54(3):243-50. PubMed PMID: 18614973. Epub 2008/07/11. eng.
- 30 65. Martin L, Birdsell L, Macdonald N, et al. Cancer cachexia in the age of obesity: skeletal  
31 muscle depletion is a powerful prognostic factor, independent of body mass index. *Journal of clinical  
32 oncology : official journal of the American Society of Clinical Oncology*. 2013 Apr 20;31(12):1539-47.  
33 PubMed PMID: 23530101. Epub 2013/03/27. eng.
- 34 66. Prado CM, Sawyer MB, Ghosh S, et al. Central tenet of cancer cachexia therapy: do patients  
35 with advanced cancer have exploitable anabolic potential? *The American journal of clinical nutrition*.  
36 2013 Oct;98(4):1012-9. PubMed PMID: 23966429. Epub 2013/08/24. eng.
- 37 67. Hansell DT, Davies JWL, Burns HJG. The relationship between resting energy expenditure and  
38 weight loss in benign and malignant disease. *Annals of Surgery*. 1986;203(3):240-5. PubMed PMID:  
39 1986225346.
- 40 68. Fredix EWHM, Soeters PB, Wouters EFM, et al. Energy balance in relation to cancer cachexia.  
41 *Clinical Nutrition*. 1990;9(6):319-24. PubMed PMID: 1991016698.
- 42 69. Staal-van den Brekel AJ, Schols AM, Dentener MA, et al. The effects of treatment with  
43 chemotherapy on energy metabolism and inflammatory mediators in small-cell lung carcinoma.  
44 *British journal of cancer*. 1997;76(12):1630-5. PubMed PMID: 9413953. Pubmed Central PMCID:  
45 PMC2228201. Epub 1997/01/01. eng.
- 46 70. Simons JP, Schols AM, Campfield LA, et al. Plasma concentration of total leptin and human  
47 lung-cancer-associated cachexia. *Clinical science*. 1997 Sep;93(3):273-7. PubMed PMID: 9337643.
- 48 71. Simons JP, Schols AM, Buurman WA, et al. Weight loss and low body cell mass in males with  
49 lung cancer: relationship with systemic inflammation, acute-phase response, resting energy  
50 expenditure, and catabolic and anabolic hormones. *Clinical science*. 1999 Aug;97(2):215-23. PubMed  
51 PMID: 10409477.
- 52  
53  
54  
55  
56  
57  
58  
59  
60

- 1  
2  
3 72. Scott HR, McMillan DC, Watson WS, et al. Longitudinal study of resting energy expenditure,  
4 body cell mass and the inflammatory response in male patients with non-small cell lung cancer. *Lung*  
5 *cancer*. 2001 Jun;32(3):307-12. PubMed PMID: 11390012. Epub 2001/06/08. eng.
- 6 73. Jatoi A, Daly BD, Hughes VA, et al. Do patients with nonmetastatic non-small cell lung cancer  
7 demonstrate altered resting energy expenditure? *The Annals of thoracic surgery*. 2001  
8 Aug;72(2):348-51. PubMed PMID: 11515864.
- 9 74. Sarhill N, Mahmoud F, Walsh D, et al. Evaluation of nutritional status in advanced metastatic  
10 cancer. *Supportive care in cancer : official journal of the Multinational Association of Supportive*  
11 *Care in Cancer*. 2003 Oct;11(10):652-9. PubMed PMID: 12920623.
- 12 75. Bauer JD, Capra S. Nutrition intervention improves outcomes in patients with cancer  
13 cachexia receiving chemotherapy--a pilot study. *Supportive care in cancer : official journal of the*  
14 *Multinational Association of Supportive Care in Cancer*. 2005 Apr;13(4):270-4. PubMed PMID:  
15 15583950.
- 16 76. Murphy RA, Mourtzakis M, Chu QS, et al. Skeletal muscle depletion is associated with  
17 reduced plasma (n-3) fatty acids in non-small cell lung cancer patients. *The Journal of nutrition*. 2010  
18 Sep;140(9):1602-6. PubMed PMID: 20631325.
- 19 77. Murphy RA, Mourtzakis M, Chu QS, et al. Nutritional intervention with fish oil provides a  
20 benefit over standard of care for weight and skeletal muscle mass in patients with nonsmall cell lung  
21 cancer receiving chemotherapy. *Cancer*. 2011 Apr 15;117(8):1775-82. PubMed PMID: 21360698.
- 22 78. Winter A, MacAdams J, Chevalier S. Normal protein anabolic response to  
23 hyperaminoacidemia in insulin-resistant patients with lung cancer cachexia. *Clinical nutrition*  
24 *(Edinburgh, Scotland)*. 2012 Oct;31(5):765-73. PubMed PMID: 22647419. Epub 2012/06/01. eng.
- 25 79. Beijer S, Hupperets PS, van den Borne BE, et al. Effect of adenosine 5'-triphosphate infusions  
26 on the nutritional status and survival of preterminal cancer patients. *Anti-cancer drugs*. 2009  
27 Aug;20(7):625-33. PubMed PMID: 19491658.
- 28 80. Khal J, Hine AV, Fearon KC, et al. Increased expression of proteasome subunits in skeletal  
29 muscle of cancer patients with weight loss. *The international journal of biochemistry & cell biology*.  
30 2005 Oct;37(10):2196-206. PubMed PMID: 16125116. Epub 2005/08/30. eng.
- 31 81. Wang Z, Heshka S, Gallagher D, et al. Resting energy expenditure-fat-free mass relationship:  
32 new insights provided by body composition modeling. *American journal of physiology Endocrinology*  
33 *and metabolism*. 2000 Sep;279(3):E539-45. PubMed PMID: 10950820. Epub 2000/08/19. eng.
- 34 82. Vaughan VC, Martin P, Lewandowski PA. Cancer cachexia: impact, mechanisms and  
35 emerging treatments. *J Cachexia Sarcopenia Muscle*. 2012 Oct 25. PubMed PMID: 23097000. Epub  
36 2012/10/26. Eng.
- 37 83. Murphy RA, Yeung E, Mazurak VC, et al. Influence of eicosapentaenoic acid supplementation  
38 on lean body mass in cancer cachexia. *British journal of cancer*. 2011 Nov 8;105(10):1469-73.  
39 PubMed PMID: 21970879. Pubmed Central PMCID: PMC3242518. Epub 2011/10/06. eng.
- 40 84. McClellan R. Exercise programs for patients with cancer improve physical functioning and  
41 quality of life. *Journal of physiotherapy*. 2013 Mar;59(1):57. PubMed PMID: 23419919. Epub  
42 2013/02/20. eng.
- 43 85. Boxer RS, Kenny AM, Dowsett R, et al. The effect of 6 months of androgen deprivation  
44 therapy on muscle and fat mass in older men with localized prostate cancer. *The aging male : the*  
45 *official journal of the International Society for the Study of the Aging Male*. 2005 Sep-Dec;8(3-4):207-  
46 12. PubMed PMID: 16390748. Epub 2006/01/05. eng.
- 47 86. Argiles JM, Busquets S, Felipe A, et al. Molecular mechanisms involved in muscle wasting in  
48 cancer and ageing: cachexia versus sarcopenia. *The international journal of biochemistry & cell*  
49 *biology*. 2005 May;37(5):1084-104. PubMed PMID: 15743680. Epub 2005/03/04. eng.
- 50 87. Sorensen JB, Klee M, Palshof T, et al. Performance status assessment in cancer patients. An  
51 inter-observer variability study. *British journal of cancer*. 1993 Apr;67(4):773-5. PubMed PMID:  
52 8471434. Pubmed Central PMCID: PMC1968363. Epub 1993/04/01. eng.
- 53  
54  
55  
56  
57  
58  
59  
60

- 1  
2  
3 88. Montoya M, Fossella F, Palmer JL, et al. Objective evaluation of physical function in patients  
4 with advanced lung cancer: a preliminary report. *Journal of palliative medicine*. 2006 Apr;9(2):309-  
5 16. PubMed PMID: 16629561. Epub 2006/04/25. eng.  
6  
7 89. May CH, Lester JF, Lee S. Performance status discordance and why it matters. *Lung cancer*.  
8 2012;75(S1):S1-S72.  
9  
10 90. Sonpavde G, Vogelzang NJ, Galsky MD, et al. Objective measures of physical functional  
11 capacity warrant exploration to complement or replace the subjective physician estimated  
12 performance status. *American journal of clinical oncology*. 2012 Apr;35(2):163-6. PubMed PMID:  
13 22433994. Epub 2012/03/22. eng.  
14  
15 91. Temel JS, Greer JA, Muzikansky A, et al. Early palliative care for patients with metastatic non-  
16 small-cell lung cancer. *The New England journal of medicine*. 2010 Aug 19;363(8):733-42. PubMed  
17 PMID: 20818875. Epub 2010/09/08. eng.  
18  
19  
20  
21  
22  
23  
24  
25  
26  
27  
28  
29  
30  
31  
32  
33  
34  
35  
36  
37  
38  
39  
40  
41  
42  
43  
44  
45  
46  
47  
48  
49  
50  
51  
52  
53  
54  
55  
56  
57  
58  
59  
60

Systematic Review of Sarcopenia in Lung Cancer ~~Final~~ Revised Manuscript 31/7/1319/11/2013

**The assessment and impact of sarcopenia in lung cancer: a systematic literature review, ~~highlighting implications for research and clinical practice.~~**

Jemima Collins, MB ChB MRCP, Clinical Research Fellow, Cardiff and Vale University Health Board

Simon Noble, MBBS MD FRCP, Reader in Palliative Medicine, Cardiff University

John Chester, BA PhD MB BS FRCP, Professor of Medical Oncology, Cardiff University

Bernadette Coles, Senior Librarian, Cancer Research Wales Library, Velindre NHS Trust

Anthony Byrne, MB ChB FRCP, Director, Marie Curie Palliative Care Research Centre, Cardiff University

## **Abstract**

### Objectives

There is growing awareness of the relationship between sarcopenia (loss of muscle mass ~~and function~~), and outcomes in ~~lung~~ cancer, making it a potential target for future therapies. In order to inform future ~~lung cancer~~ research and practice, we undertook a systematic review of factors associated with loss of muscle mass, and the relationship between muscle function and muscle mass in lung cancer, a common condition associated with poor outcomes.

1  
2  
3  
4  
5  
6  
7  
8  
9  
10  
11  
12  
13  
14  
15  
16  
17  
18  
19  
20  
21  
22  
23  
24  
25  
26  
27  
28  
29  
30  
31  
32  
33  
34  
35  
36  
37  
38  
39  
40  
41  
42  
43  
44  
45  
46  
47  
48  
49

Design

We conducted a computerised systematic literature search on five databases. Studies were included if they explored muscle mass as an outcome measure in lung cancer patients, and were published in English.

Setting

Secondary care

Participants

Patients with lung cancer.

Primary outcome

~~Muscle mass values associated with or without muscle strength or physical performance. Factors associated with loss of muscle mass and muscle function, or sarcopenia, and the clinical impact thereof in lung cancer patients. We recorded the units and methods of measuring muscle mass, and the comparison or correlation that was assessed.~~

Results

We reviewed 52265726 citations, and 35 papers were selected for analysis. Sarcopenia, as defined by reduced muscle mass alone, was found to be very prevalent in lung cancer patients, regardless of body mass index, and where present was associated with poorer functional status and overall survival. There were diverse studies exploring molecular and metabolic factors in the development of loss of muscle mass, however the precise mechanisms that contribute to sarcopenia and cachexia remain uncertain. The effect of nutritional supplements and adenosine triphosphate infusions on muscle mass showed conflicting results. There is very limited data on the correlation between degree of sarcopenia and muscle function, which has a non-linear relationship in older non-cancer populations.

### Conclusion

Loss of muscle mass is a significant contributor to morbidity in lung cancer patients. Loss of muscle mass and function may pre-date clinically overt cachexia, underlining the importance of evaluating sarcopenia, rather than weight loss alone. Understanding this relationship and its associated factors will provide opportunities for focused intervention to improve clinical outcomes.

### Keywords

Sarcopenia; cachexia; muscle mass; physical performance; lung cancer

## **Article Summary**

### **Article Focus**

- Sarcopenia, the loss of muscle mass and muscle function, is a significant contributor to morbidity in lung cancer patients.
- Sarcopenia is a key component of a new definition of cancer cachexia, however its relationship to cachexia in the lung cancer literature is poorly defined.

### **Key messages**

- Sarcopenia is prevalent in lung cancer patients regardless of body mass index and body weight, and where present is associated with poorer functional status and overall survival.
- There is very limited data on the correlation between the degree of loss of muscle mass and muscle function, which has a non-linear relationship in older non-cancer populations.
- The heterogeneity of cut-off values for cancer-related sarcopenia necessitates a standardised definition which can be used clinically and in the research setting, to harmonise reporting and allow for direct comparison of results as well as meta-analysis of data.

### **Strengths and limitations of this study**



- Timely systematic review considering the increasingly recognised phenomenon of sarcopenia, as it relates to cachexia, which affects not only patients with lung cancer, but also the wider cancer population.
- Limited to publications in English only.

## Introduction

Over the last decade, there has been increasing recognition of the clinical importance of sarcopenia as part of the cancer cachexia syndrome, and its impact has been evaluated in a wide range of malignancies including lung, breast, upper gastrointestinal, hepatocellular and colorectal cancers (1-5). The term sarcopenia is derived from the Greek meaning “poverty of flesh” and is characterised by a triad of progressive loss of skeletal muscle mass, muscle strength and physical performance (6). It was originally described in the elderly non-cancer population, and is often now defined as a geriatric syndrome associated with functional impairment, increased risk of falls, fractures and reduced survival (7-9). Sarcopenia becomes more prevalent as we age - of 1,421 healthy adults aged 45 years or over, the overall prevalence was 15%, rising to 64% over the age of 85 (10). This loss of muscle mass is usually gradual and not necessarily associated with significant or sudden weight loss.

The detrimental effects of sarcopenia can also be seen in younger patients in association with muscle disuse, malnutrition, or inflammatory conditions, particularly cancer. Interest in sarcopenia as a poor prognostic indicator in cancer is rising; in various cancer populations sarcopenia is associated

1  
2  
3  
4  
5 with poorer performance status (1), reduced overall survival (11, 12), and increased risk of chemotherapy toxicities (2, 4). This interest is reflected in a  
6  
7 recent international consensus on the definition of cancer cachexia, which established sarcopenia as a key diagnostic criterion (13).  
8  
9

10  
11  
12  
13 The hallmark of sarcopenia is low muscle mass, more specifically an appendicular skeletal muscle mass index of more than two standard deviations  
14 below the sex-specific mean of healthy adults (i.e. 5.45kg/m<sup>2</sup> for women and 7.26 kg/m<sup>2</sup> for men) (8). However, central to the concept of sarcopenia is the  
15 recognition that overall neuromuscular function, rather than muscle mass alone, is essential for maintenance of independence. Therefore, when defining  
16 sarcopenia, it is vital to assess muscle strength, or physical performance, in addition to muscle mass, as the relationship between muscle mass and strength  
17 is non-linear (14, 15).  
18  
19  
20  
21  
22  
23  
24  
25  
26  
27

28 Whilst many different techniques have been used to measure muscle mass and strength, few have been incorporated into routine assessment of  
29 the cancer population. The current gold standards are computed tomography (CT), magnetic resonance imaging (MRI), and dual energy x-ray  
30 absorptiometry (DEXA) scans. CT and MRI allow precise differentiation between fat and other soft tissue including muscle and are therefore investigations  
31 of choice. CT focuses on a specific area of the body – e.g. muscle cross sectional area at the third lumbar vertebra – which can be related to whole body  
32 muscle mass. It is the current gold standard in body composition research and has the advantage that many patients will have CT scans as part of their  
33 diagnostic and treatment assessments. However, DEXA involves less radiation exposure compared to CT and accurately and precisely differentiates  
34  
35  
36  
37  
38  
39  
40  
41  
42  
43  
44  
45

1  
2  
3  
4  
5 between lean and fat body compartments (16). More indirect techniques for measuring muscle mass include bioelectrical impedance analysis which is non-  
6 invasive but less accurate compared to DEXA. It includes a measure of organ mass other than skeletal muscle, but is easily performed in clinical settings  
7  
8  
9 (17). Measurements of mid upper arm circumference and arm muscle area using skinfold thickness methods have also been used (18), although these  
10 assessments are less accurate and there exists considerable inter-observer variability. Measurements of muscle strength in the literature have mainly  
11 centred around handgrip and quadriceps strength, although in non-cancer elderly patients, functional assessments such as the Short Physical Performance  
12 Battery and sit-to-stand tests (19, 20) have been shown to correlate with adverse outcomes.  
13  
14  
15  
16  
17  
18  
19  
20  
21

22 From the literature it is clear that there is marked diversity in current clinical practice in assessing the degree of muscle loss in cancer patients and  
23 in quantifying its functional implications. If the loss of muscle mass and strength have significant clinical implications for cancer patients, then standardised,  
24 validated diagnostic thresholds are clearly needed. Furthermore, while the effects of sarcopenia have been extensively studied in the elderly, factors  
25 associated with loss of muscle mass and strength in cancer remain unclear. As the pathophysiological mechanisms responsible for loss of muscle mass in  
26 cancer differ, at least in part, from those in sarcopenia of ageing, it is necessary to evaluate cancer-specific causative factors and clinical implications.  
27  
28  
29  
30  
31  
32  
33  
34  
35  
36  
37

38 We therefore undertook a systematic literature review to further understand the relationship between muscle function and muscle mass and its  
39 implications for research and clinical practice within the context of cancer. We limited the review to focus on lung cancer as an example of a common  
40  
41  
42  
43  
44  
45  
46  
47  
48  
49

1  
2  
3  
4  
5 cancer, associated with poor outcomes, in which sarcopenia has been shown to have a significant prognostic impact. Lung cancer has a worldwide incidence  
6 rate of 1.61 million cases per year (21), and frequently presents in the advanced stages. Despite advances in anticancer therapies, survival benefits in lung  
7 cancer patients over the past thirty years have been relatively small compared to those seen in breast, colorectal and prostate cancers (22). Whilst reasons  
8 for this are complex, many lung cancer patients are ineligible for radical treatment at presentation due to poor performance status or co-morbidity, while  
9 others fail to receive their intended treatment plan because of functional decline (23, 24). Non-small cell lung cancer (NSCLC) has a particularly strong  
10 association with loss of muscle mass - of 441 patients consecutively referred to a regional oncology service, 47% were found to be sarcopenic (25). This  
11 prevalence can be compared with 16% of a cohort of 471 breast cancer survivors (26) and 39% in a cohort of 234 pre-operative colorectal cancer patients  
12 (5). We conducted this systematic review with this in mind.  
13  
14  
15  
16  
17  
18  
19  
20  
21  
22

23 ~~There are 42,000 cases of lung cancer diagnosed in the United Kingdom each year and approximately three quarters are over the age of 65 at~~  
24 ~~diagnosis. Despite advances in anticancer therapies, survival benefits in lung cancer patients over the past thirty years have been relatively small compared~~  
25 ~~to those seen in breast, colorectal and prostate cancers [1]. Whilst reasons for this are complex, many lung cancer patients are ineligible for radical~~  
26 ~~treatment at presentation due to poor performance status or co-morbidity, while others fail to receive their intended treatment plan because of functional~~  
27 ~~decline [2, 3].~~  
28  
29  
30  
31  
32  
33  
34  
35  
36  
37

38 ~~Sarcopenia is a widely recognised phenomenon that has important clinical implications in the management of lung cancer. It is characterised by a~~  
39 ~~triad of progressive loss of skeletal muscle mass, muscle strength and physical performance [4]. It was originally described in the elderly non-cancer~~  
40  
41  
42  
43  
44  
45

1  
2  
3  
4  
5 population, and is often now defined as a geriatric syndrome associated with functional impairment, increased risk of falls, fractures and reduced survival  
6  
7 [4-7]. However, sarcopenia may also be seen in younger patients in association with muscle disuse, malnutrition or inflammatory diseases, including cancer  
8  
9 [4].

10  
11  
12  
13  
14  
15  
16 Central to the concept of sarcopenia is the recognition that overall neuromuscular function, rather than muscle mass alone, is essential for  
17  
18 maintenance of independence. Although originally defined as an appendicular skeletal muscle mass index of more than two standard deviations below the  
19  
20 sex-specific mean of healthy adults (i.e. 5.45kg/m<sup>2</sup> for women and 7.26 kg/m<sup>2</sup> for men) [6] the current consensus on defining sarcopenia requires  
21  
22 assessment of muscle strength, or performance, as well as mass [8]. Loss of muscle mass is usually gradual and not necessarily associated with significant or  
23  
24 sudden weight loss, and the relationship between muscle mass and strength is non-linear [9, 10].

25  
26  
27  
28  
29  
30 Loss of muscle mass, with or without loss of fat mass, is also a predominant component of weight loss seen in cancer cachexia, a complex metabolic  
31  
32 syndrome with inflammation recognised as a key feature [11]. The pathophysiological mechanisms responsible for loss of muscle mass in cancer cachexia  
33  
34 differ, at least in part, from those in sarcopenia of ageing. Therefore, in established cachexia, most patients will have sarcopenia, whereas sarcopenic  
35  
36 patients are often not cachectic.

1  
2  
3  
4  
5 Over the last decade, there has been increasing recognition of the importance of sarcopenia as part of the cancer cachexia syndrome and its impact  
6 has been evaluated in patients with lung, breast, upper gastrointestinal, hepatocellular and colorectal malignancies [12-16]. Non-small cell lung cancer  
7 (NSCLC) has a particularly strong association with loss of muscle mass—of 441 patients consecutively referred to a regional oncology service, 46.7% were  
8 defined as sarcopenic, based on muscle mass measurements [17]. As with the elderly non-cancer patient, sarcopenia in cancer has important clinical  
9 implications. Most notably it is associated with poor performance status and reduced survival [12]. It also appears to be associated with an increase in  
10 chemotherapy-related toxicities [13, 15].  
11  
12  
13  
14  
15  
16  
17  
18  
19  
20  
21

22 In the context of lung cancer, cachexia and sarcopenia frequently coexist and may be clinically indistinguishable. However, having clear working  
23 definitions may allow earlier recognition of the conditions and provide a framework for research to identify early markers and focused interventions,  
24 offering complementary therapeutic approaches. It is also important to consider that, although lung cancer cachexia may lead to sarcopenia, sarcopenia  
25 may itself pre-date cachexia. Failure to recognise this may lead to lost opportunities to limit and treat sarcopenia in the NSCLC patient, and thereby better  
26 preserve performance status. This could impact on survival for patients, through reduced eligibility for active treatments and reduced ability to tolerate  
27 chemotherapy toxicities [2, 12]. In the previously mentioned cohort, where 46.7% of NSCLC patients were found to be sarcopenic, only 7.3% were  
28 underweight. Furthermore, of those classified as overweight in terms of body mass index, 59% were sarcopenic [17]. It may, therefore, be more useful to  
29 assess sarcopenia, rather than weight loss or BMI, when evaluating the suitability of NSCLC patients for future treatments.  
30  
31  
32  
33  
34  
35  
36  
37  
38  
39  
40  
41  
42  
43  
44  
45  
46  
47  
48  
49

~~Much of the discussion of sarcopenia, as it relates to cancer cachexia, has relied on the narrower definition of loss of muscle mass. Whilst loss of function is a recognised later consequence of cancer cachexia, muscle strength or performance have not been routinely measured as part of the initial assessment of cachexia severity, despite being central to the current, broader definition of sarcopenia. As clear consensus emerges on the definitions of cachexia [18-20], a better understanding of the inter-dependence between cachexia and sarcopenia suggests that early recognition of sarcopenia as part of, or prior to, cachexia in NSCLC may yield improvements in patient outcomes.~~

~~To understand this further, we aimed to systematically review all relevant literature pertaining to factors associated with loss of muscle mass in lung cancer, and the relationship between muscle performance and muscle mass, in order to critically evaluate its implications for research and clinical practice.~~

## Methods

### *Search strings and data sources*

We executed a broad literature search, including various terminologies used to describe loss of muscle mass, but also specifically used 'sarcopenia' as a multi-purpose field search term. Recognising that changes in muscle mass may impact on muscle strength and physical function, we included these terms in

our search. We united two search strings: loss of muscle mass (and its implications) AND lung cancer (see Table 1). The search was limited to English language and humans, with a publication date from 1946 to October ~~2013~~2012. We used the same search strings to develop strategies in the following five databases in order to ensure maximal coverage: Medline, Medline In-Process, EMBASE, AMED, and the Cochrane library.

Table 1: Search strings and terms

| Search strings             | Search terms                               |
|----------------------------|--------------------------------------------|
| <b>Loss of muscle mass</b> | Sarcopenia OR                              |
|                            | Muscle atrophy OR                          |
|                            | Muscle weakness OR                         |
|                            | Muscle mass OR                             |
|                            | Muscle wasting OR                          |
|                            | Muscle loss OR                             |
|                            | Weight loss OR                             |
|                            | Muscle strength OR                         |
|                            | Physical fitness OR                        |
|                            | Physical exertion OR                       |
|                            | Activities of daily living OR              |
|                            | Cachexia                                   |
|                            | <b>AND</b>                                 |
| <b>Lung cancer</b>         | Lung (neoplasm OR malignancy OR tumour)    |
|                            | Pleural (neoplasm OR malignancy OR tumour) |



### *Paper retrieval*

Citations were independently screened by two researchers (JC and SN) and included for initial analysis if they described muscle mass measurements or body composition in patients with lung cancer. Both prospective and retrospective original articles were included, but conference abstracts, citations without abstracts, case reports, review articles and opinion pieces were excluded. All studies that had a cohort of lung cancer patients were included, even if there were other cancer patient groups analysed. Retrieved papers were searched for additional relevant references.

### *Inclusion criteria and data extraction*

The selected papers were reviewed in full by two independent researchers (JC and SN) for consideration of inclusion in the review. Where discordance in selection was observed, the paper in question was discussed until consensus was reached. As there were many papers describing muscle mass as part of routine anthropometry or body composition assessments, without directly exploring it, we only included papers in which muscle mass was explored as an outcome measure. Data including patient characteristics and numbers, histological subtype, and TNM stage, were collated and tabulated (Tables 23-34).

We also noted units of muscle mass measurements, and techniques used to measure these.

## Results

Using our broad search terms in 5 databases, we found an initial ~~57265226~~ citations, from which we identified ~~6457~~ potentially relevant papers. Three further potential papers (27-29) were identified from the references of these papers. From these, we excluded 11 abstracts with no published papers, ~~two~~ further abstracts that did not mention muscle mass ~~or body composition~~ (30, 31), and a systematic review of cancer cachexia (32). Out of the ~~5347~~ final papers, we excluded a further 13 papers which mentioned muscle mass in baseline anthropometry details but did not use it as an outcome measure (33-45), four papers which described weight loss rather than loss of muscle mass (46-49), and one paper describing the same results obtained from the same patient population as another paper (50), with slightly different secondary endpoints (51). During the process of data extraction, a number of recurring themes became apparent. We have presented these under two main headings – factors associated with loss of muscle mass, and degree of loss of muscle mass and physical functioning. A number of studies explored multiple variables associated with loss of muscle mass, and are therefore mentioned under more than one heading.

Figure 1 shows a breakdown of the results of our search using the search terms used, and the derivation of papers for final analysis.

Insert Figure 1 here

1  
2  
3  
4  
5  
6  
7  
8 For the final analysis, 4 randomised controlled studies, ~~1716~~ cross-sectional studies and ~~149~~ longitudinal studies met the established criteria: ~~3529~~ papers in  
9 total. Muscle mass data were reported variously as fat free mass, body cell mass, lean body mass, appendicular skeletal muscle mass, smooth muscle area  
10 at ~~the levels of lumbar vertebra L3 and thoracic vertebra T4-L3~~, mid upper arm circumference and arm muscle area. Notably, most studies described muscle  
11 mass in more than one way. Muscle function was described as hand-grip and/or quadriceps strength (17, 27, 52-54), intensity of physical activity (55),  
12 patient-reported physical functioning (28), and both muscle strength and physical performance (56).  
13  
14  
15  
16  
17  
18  
19  
20  
21  
22

23 As the studies in our review expressed muscle mass in different ways, we have used the term fat-free mass (FFM) or loss of muscle mass in the body of our  
24 article in order to allow direct comparison. In addition, where the studies in this review defined a patient group as having sarcopenia, they did so based on  
25 loss of muscle mass alone, without evaluation of muscle strength or performance. This needs to be borne in mind wherever the term sarcopenia is used  
26 throughout this review.  
27  
28  
29  
30  
31  
32  
33  
34

35 *Factors associated with loss of muscle mass*  
36  
37

38 Table ~~23~~: Loss of muscle mass as outcome measures and factors associated with it~~Factors associated with loss of muscle mass~~  
39  
40  
41  
42  
43  
44  
45  
46  
47  
48  
49

1  
2  
3  
4  
5  
6  
7  
8  
9  
10  
11  
12  
13  
14  
15  
16  
17  
18  
19  
20  
21  
22  
23  
24  
25  
26  
27  
28  
29  
30  
31  
32  
33  
34  
35  
36  
37  
38  
39  
40  
41  
42  
43  
44  
45  
46  
47  
48  
49

| AuthorsFirst<br>author, year | Patients   |                                                                                 |                            | Study                       |                                         | Comparison                   | Result                                                                                                                                                                                                                                                                                                         |
|------------------------------|------------|---------------------------------------------------------------------------------|----------------------------|-----------------------------|-----------------------------------------|------------------------------|----------------------------------------------------------------------------------------------------------------------------------------------------------------------------------------------------------------------------------------------------------------------------------------------------------------|
|                              | No, (M/F)  | Tumour, Stage                                                                   | Muscle Mass Measurement(s) | Method of Measurement       | Design                                  |                              |                                                                                                                                                                                                                                                                                                                |
| McMillan 2001(57)            | 40 (40/0)  | NSCLC n=11, upper GI n=22, colon n=7.<br><br>All locally advanced or metastatic | BCM                        | Total body potassium        | Cross-sectional                         | Nil                          | The inter-relationship between albumin, body cell mass and the systemic inflammatory response<br><br>Albumin concentrations correlated with BCM (r=0.686, p<0.001) and negatively correlated with CRP (r=-0.545, p<0.001)                                                                                      |
| Crown 2002 (58)              | 30 (NR/NR) | NSCLC in all Inoperable, stage NR                                               | FFM, MUAC                  | BIA, upper arm measurements | Case-control, Longitudinal over 2 years | n=30 healthy volunteers (HV) | Insulin-like growth factor (ILGF) system and cancer cachexia<br><br>More LC than HV had MAMC in the lowest quartile (p<0.05) at baseline,<br><br>Male LC patients had lower FFM than male HV (p<0.05) at baseline,<br><br>No sig longitudinal trend observed in IGFBP-3 and IL-6 and nutritional status, p=NS. |
| Jago 2002 (59)               | 36 (27/9)  | Mix of NSCLC and SCLC                                                           | FFMi                       | BIA, Four skinfold method,  | Cross-sectional                         | n=10 patients referred for   | Ubiquitin-proteasome and lysosomal<br><br>Cathepsin B expression in LC inversely related to FFMi, p=0.003;                                                                                                                                                                                                     |

1  
2  
3  
4  
5  
6  
7  
8  
9  
10  
11  
12  
13  
14  
15  
16  
17  
18  
19  
20  
21  
22  
23  
24  
25  
26  
27  
28  
29  
30  
31  
32  
33  
34  
35  
36  
37  
38  
39  
40  
41  
42  
43  
44  
45  
46  
47  
48  
49

|                                     |             |                                                                                                       |                  |                 |                     |                                          |                                                                                                                           |                                                                                                                                                                                              |
|-------------------------------------|-------------|-------------------------------------------------------------------------------------------------------|------------------|-----------------|---------------------|------------------------------------------|---------------------------------------------------------------------------------------------------------------------------|----------------------------------------------------------------------------------------------------------------------------------------------------------------------------------------------|
|                                     |             | Stage 1 – 21                                                                                          |                  | %BFMAMA         |                     | thoracotomy for non-malignant conditions | proteolytic pathway gene expression in LC and association with LMM                                                        | Cathepsin-B expression increased in 'depleted FFMi cancer patients' vs controls p=0.003;                                                                                                     |
|                                     |             | Stage 2 – 6                                                                                           |                  |                 |                     |                                          |                                                                                                                           | No relationship between cathepsin B expression and %BFMAMA, p=NS                                                                                                                             |
|                                     |             | Stage 3 – 6                                                                                           |                  |                 |                     |                                          |                                                                                                                           |                                                                                                                                                                                              |
|                                     |             | Stage 4 – 2                                                                                           |                  |                 |                     |                                          |                                                                                                                           |                                                                                                                                                                                              |
| <b>Wieland 2007 (60)</b>            | 286 (NR/NR) | <u>NSCLC n=181, stage IIIB or IV</u>                                                                  | <u>SMA at T4</u> | <u>CT at T4</u> | <u>Longitudinal</u> | <u>n=7 healthy volunteers</u>            | <u>Establish prevalence of proteolysis-inducing factor (PIF) in cancer patients, and its association with muscle loss</u> | <u>In NSCLC patients: PIF unrelated to survival and muscle loss, p=NS; PIF positive patients rate of loss of muscle mass per 100days -3.4±2.1% vs PIF negative patients -2.4 ±1.7%, p=NS</u> |
| <b>Martinez-Hernandez 2012 (61)</b> | 21 (19/2)   | <u>Lung cancer n=13, GI cancer n=6, Other cancer n=2</u><br><u>Stage according to tumour group NR</u> | <u>FFM</u>       | <u>BIA</u>      | <u>Longitudinal</u> | <u>n=8 healthy volunteers</u>            | <u>The role of interleukin-15 (IL-15) in cachectic cancer patients</u>                                                    | <u>At weeks 4 and 8, cancer patients lost FFM in tandem with decreasing IL-15 levels, r=0.514 and r=0.535, both p&lt;0.05</u>                                                                |
| <b>Op den Kamp 2012 (55)</b>        | 16 (15/1)   | NSCLC in all Stage I-II –                                                                             | FFMi             | DEXA            | Cross-sectional     | n=10 healthy                             | Skeletal muscle NF-kB and ubiquitin proteasome system                                                                     | FFMi no significant difference in pre-cachectic cancer vs                                                                                                                                    |

1  
2  
3  
4  
5  
6  
7  
8  
9  
10  
11  
12  
13  
14  
15  
16  
17  
18  
19  
20  
21  
22  
23  
24  
25  
26  
27  
28  
29  
30  
31  
32  
33  
34  
35  
36  
37  
38  
39  
40  
41  
42  
43  
44  
45  
46  
47  
48  
49

|                              |                  |                                                              |                   |                      |                        |                                  |                                                                                                                            |                                                                                                                                                                                                                  |
|------------------------------|------------------|--------------------------------------------------------------|-------------------|----------------------|------------------------|----------------------------------|----------------------------------------------------------------------------------------------------------------------------|------------------------------------------------------------------------------------------------------------------------------------------------------------------------------------------------------------------|
|                              |                  | 11                                                           |                   |                      |                        | volunteers                       | activity in pre-cachexia                                                                                                   | controls, p=NS; NF-κB, UPS E3-ligase and 26S proteasome activity not raised in pre-cachectic cancer patients, all p=NS                                                                                           |
|                              |                  | Stage IIIA – 2                                               |                   |                      |                        |                                  |                                                                                                                            |                                                                                                                                                                                                                  |
|                              |                  | Stage IIIB – 3                                               |                   |                      |                        |                                  |                                                                                                                            |                                                                                                                                                                                                                  |
| <b>Vigano 2009 (52)</b>      | N=172 (101/71)   | NSCLC n=64, All stage III and IV. Metastatic GI cancer n=108 | LBM, ALM          | DEXA (n=64)          | Cross-sectional        | Nil                              | ACE gene polymorphism (insertion <sup>2</sup> -II, insertion/deletion-ID, deletion <sup>2</sup> -DD) on nutritional status | Trend (p=0.07) towards lower LBM in ID compared to II groups                                                                                                                                                     |
| <b>Op den Kamp 2013 (62)</b> | <u>26 (17/9)</u> | <u>NSCLC Stage IIIB – 10 Stage IV – 16</u>                   | <u>FFMi, AMMi</u> | <u>DEXA</u>          | <u>Cross-sectional</u> | <u>n = 10 healthy volunteers</u> | <u>Expression of signalling molecules in protein metabolism in lung cancer cachexia</u>                                    | <u>AMMi 20% lower in cachectic group compared with controls, p&lt;0.05; Akt concentration increased in cachectic group (p&lt;0.05), but no downstream signal phosphorylation i.e. impaired anabolic activity</u> |
| <b>Harvie 2003 (29)</b>      | 50 (32/18)       | NSCLC In all, Stage III and IV                               | FFM               | Four skinfold method | Longitudinal           | Nil                              | Exploration of gender-specific differences in body composition and                                                         | Trend for FFM to decrease (p=0.063) and FFM decreased (p<0.05) in men after                                                                                                                                      |

peer review only

Systematic Review of Sarcopenia in Lung Cancer ~~Final~~ Revised Manuscript 31/7/13 19/11/2013

|                                |                       |                                                                                                             |                        |                        |                     |            |                                                                                                                             |                                                                                                                                                              |
|--------------------------------|-----------------------|-------------------------------------------------------------------------------------------------------------|------------------------|------------------------|---------------------|------------|-----------------------------------------------------------------------------------------------------------------------------|--------------------------------------------------------------------------------------------------------------------------------------------------------------|
|                                |                       |                                                                                                             |                        |                        |                     |            | REE pre- and post-chemotherapy                                                                                              | chemotherapy. No significant difference in FFM or REE in women.                                                                                              |
| <b>Harvie 2005 (63)</b>        | 43 (28/15)            | NSCLC in all, Stage III and IV. Alongside this metastatic breast and melanoma patients evaluated separately | FFM                    | Four skinfold method   | Longitudinal        | Nil        | Relationship between energy intake, REE and acute phase response vs changes in body composition over course of chemotherapy | No significant change in FFM over the course of chemotherapy, and no significant relationship with energy intake, REE or c-reactive protein (CRP) (all p=NS) |
| <b>Bovio 2008 (64)</b>         | 144 (92/52)           | LC n=46, colon n=22, HCC n=11, other n=65<br>Stage NR                                                       | AMA                    | Upper arm measurements | Cross-sectional     | Nil        | Evaluation of nutritional status in patients with advanced cancer                                                           | 63% men vs 19% women had AMA <5 <sup>th</sup> percentile (p<0.01)                                                                                            |
| <b>Baracos 2010 (25)</b>       | 441 (229/212)         | NSCLC in all<br>Stage III – 206<br>Stage IV – 235                                                           | SMA at L3              | CT of L3               | Cross-sectional     | Nil        | The use of CT images in evaluating body composition in NSCLC                                                                | 61.1% men in cohort were sarcopenic, 31.3% of women sarcopenic, p<0.001                                                                                      |
| <b><u>Martin 2013 (65)</u></b> | <u>1473 (828/645)</u> | <u>Colorectal cancer n=773,</u>                                                                             | <u>SMA at L3, SMAi</u> | <u>CT of L3</u>        | <u>Longitudinal</u> | <u>Nil</u> | <u>Prognostic significance of weight loss, muscle mass index and</u>                                                        | <u>Concordance model using variables of BMI, weight loss, muscle index (MI) and muscle</u>                                                                   |

1  
2  
3  
4  
5  
6  
7  
8  
9  
10  
11  
12  
13  
14  
15  
16  
17  
18  
19  
20  
21  
22  
23  
24  
25  
26  
27  
28  
29  
30  
31  
32  
33  
34  
35  
36  
37  
38  
39  
40  
41  
42  
43  
44  
45  
46  
47  
48  
49

For peer review

|                          |                      |                                                                                                 |                  |                                          |                     |                                     |                                                                                                                       |                                                                                                                                                                           |                                                                                                                                                            |
|--------------------------|----------------------|-------------------------------------------------------------------------------------------------|------------------|------------------------------------------|---------------------|-------------------------------------|-----------------------------------------------------------------------------------------------------------------------|---------------------------------------------------------------------------------------------------------------------------------------------------------------------------|------------------------------------------------------------------------------------------------------------------------------------------------------------|
|                          |                      | <u>Lung cancer</u><br><u>n=440,</u>                                                             |                  |                                          |                     |                                     |                                                                                                                       | <u>muscle attenuation</u>                                                                                                                                                 | <u>attenuation (MA) found a concordance statistic (predictive accuracy of survival) of 0.92</u>                                                            |
|                          |                      | <u>Other GI cancer</u><br><u>n=260</u>                                                          |                  |                                          |                     |                                     |                                                                                                                       |                                                                                                                                                                           | <u>Regardless of BMI, pts with weight loss, low MI and MA reduced survival (8.4mo), compared to those with none of these features (28.4mo), p&lt;0.001</u> |
|                          |                      | <u>Stage according to cancer NR</u>                                                             |                  |                                          |                     |                                     |                                                                                                                       |                                                                                                                                                                           |                                                                                                                                                            |
| <u>Prado 2013 (66)</u>   | <u>368 (216/152)</u> | <u>NSCLC n=242</u>                                                                              | <u>SMA at L3</u> | <u>CT of L3</u>                          | <u>Longitudinal</u> | <u>Nil</u>                          |                                                                                                                       | <u>Clinical course of skeletal muscle wasting in advanced cancer</u>                                                                                                      | <u>Being &lt;90days from death increases risk of muscle loss, OR 2.67, p=0.002; and decreases chance of muscle gain, OR=0.37, p=0.002</u>                  |
|                          |                      | <u>GI tract cancer n=126</u>                                                                    |                  |                                          |                     |                                     |                                                                                                                       |                                                                                                                                                                           |                                                                                                                                                            |
| <b>Hansell 1986 (67)</b> | 98 (63/35)           | Colorectal cancer n=55,<br>Gastric cancer n=24,<br>LC n=12,<br>Other cancer n=7<br><br>Stage NR | LBM, MUAC        | Tritiated saline, upper arm measurements | Cross-sectional     | n=38<br><br>non-malignant illnesses | REE in weight-losing cancer patients<br><br>WLC = weight-losing cancer patients, WSC = weight-stable cancer patients, | WLC compared to WSC had lower LBM (p<0.005);<br><br>WLC compared to WSC and WSC on lower MAMC (p<0.0005);<br><br>WLC had increased REE/kgBodyweight compared with both WS |                                                                                                                                                            |



|                                       |                        |                                                                         |           |      |                 |              |  |                                                                                  |                                                                                                                                                            |
|---------------------------------------|------------------------|-------------------------------------------------------------------------|-----------|------|-----------------|--------------|--|----------------------------------------------------------------------------------|------------------------------------------------------------------------------------------------------------------------------------------------------------|
|                                       |                        |                                                                         |           |      |                 |              |  | WScOn = weight-stable controls                                                   | groups (p<0.005);<br><br>No significant difference when REE is expressed in terms of kgLBM;<br><br>WLC had positive relationship with REE, r=0.83, p<0.001 |
| <b>Fredrix 1990 (68)</b>              | 39 (GCR 13/9, LC 16/1) | LC n=17<br><br>GCR – Gastric and colorectal cancer n=22<br><br>Stage NR | FFM       | BIA  | Cross-sectional | n=40 healthy |  | REE and weight loss                                                              | FFM: LC 50.4±8.9, Controls 51.1±9.6, p=NS;<br><br>REE/FFM: LC 33.5±5.4, Controls 29.6±2.9, p<0.01                                                          |
| <b>Staal-van den Brekel 1997 (69)</b> | 12 (10/2)              | All SCLC                                                                | FFM       | BIA  | Longitudinal    | Nil          |  | Assess REE and systemic inflammation pre- and post-chemotherapy                  | No change in FFM post-chemo (p=NS). Absolute REE and REE adjusted for FFM decreased post-chemotherapy (p<0.005)                                            |
| <b>Simons 1997 (70)</b>               | 21 (21/0)              | NSCLC n=19<br><br>Stage I – 3<br><br>Stage III – 5<br><br>Stage IV – 11 | FFM, FFMi | DEXA | Cross-sectional | Nil          |  | Relationship between detectable leptin (DL) expression, body composition and REE | DL vs NonDL no significant difference between groups with regards FFM, FFMi, and REE/FFM, all p=NS                                                         |

1  
2  
3  
4  
5  
6  
7  
8  
9  
10  
11  
12  
13  
14  
15  
16  
17  
18  
19  
20  
21  
22  
23  
24  
25  
26  
27  
28  
29  
30  
31  
32  
33  
34  
35  
36  
37  
38  
39  
40  
41  
42  
43  
44  
45  
46  
47  
48  
49

SCLC n=2  
Limited stage – 2

|                         |           |                                                              |           |                      |                 |                       |                                                                                             |                                                                                                                                                                                                                    |
|-------------------------|-----------|--------------------------------------------------------------|-----------|----------------------|-----------------|-----------------------|---------------------------------------------------------------------------------------------|--------------------------------------------------------------------------------------------------------------------------------------------------------------------------------------------------------------------|
| <b>Simons 1999 (71)</b> | 20 (20/0) | NSCLC n=18<br>I-II – 2<br>III – 5<br>IV – 11<br><br>SCLC n=2 | BCM, BCMi | DEXA                 | Cross-sectional | Nil                   | Relationship between weight loss, low BCM and systemic inflammation                         | BCM lower in group with weight loss ≥10% compared to group with weight loss <10%, p=NS;<br><br>Low BCMi associated with high REE/BCM, r=-0.54, p=0.03;<br><br>BCMi positively correlated with Karnofsky PS, p=0.02 |
| <b>Scott 2001 (72)</b>  | 12 (12/0) | NSCLC in all, locally advanced                               | BCM       | Total body potassium | Longitudinal    | n=7, healthy subjects | Inter-relationship between systemic inflammation and REE pre- and post-onset of weight loss | Cancer group had lower REE (p<0.05) and BCM (p<0.001).<br><br>Cancer group REE adjusted for BCM correlated with CRP concentrations (r=0.753, p<0.01)                                                               |

Systematic Review of Sarcopenia in Lung Cancer ~~Final~~ Revised Manuscript 31/7/13 19/11/2013

|                          |                                                      |                                                                                                   |                       |                                                                   |                 |                                |                                                                                                                                            |                                                                                                                                           |
|--------------------------|------------------------------------------------------|---------------------------------------------------------------------------------------------------|-----------------------|-------------------------------------------------------------------|-----------------|--------------------------------|--------------------------------------------------------------------------------------------------------------------------------------------|-------------------------------------------------------------------------------------------------------------------------------------------|
| <b>Jatoi 2001 (73)</b>   | 18 (10/8)                                            | NSCLC in all<br>Stage IA – 6<br>Stage IB – 3<br>Stage IIB – 3<br>Stage IIIA – 4<br>Stage IIIB – 2 | FFM, BCM, LBM         | DEXA,<br>Potassium-40,<br>tritium dilution                        | Cross-sectional | n=18,<br>healthy<br>volunteers | REE in<br>nonmetastatic<br>NSCLC                                                                                                           | REE in cancer vs controls<br>significantly raised when<br>adjusted for LBM,<br>p=0.001;<br><br>and also when adjusted<br>for BCM, p=0.032 |
| <b>Jago 2001 (27)</b>    | 60 (43/17)                                           | LC in all                                                                                         | FFM, MAMC,<br>BFMAMA  | BIA, four<br>skinfold-<br>thickness, upper<br>arm<br>measurements | Cross-sectional | n=22, mild<br>COPD             | Nutritional status<br>of patients<br>undergoing lung<br>cancer operations                                                                  | No difference in FFMi<br>and BFMAMA comparing<br>LC and controls, all p=NS                                                                |
| <b>Sarhill 2003 (74)</b> | N=352 but<br>LC only 18%<br>of cohort ()             | NR                                                                                                | MUAC, AMA             | BIA (n=329)                                                       | Cross-sectional | Nil                            | Prospective<br>evaluation of<br>nutritional status in<br>advanced cancer                                                                   | Cachexia group vs non-<br>cachexia group, reduced<br>AMA in 84% vs 69%,<br>p=0.037                                                        |
| <b>Prado 2008 (1)</b>    | N=250, with<br>LC 60 (24%)<br>of cohort<br>(136/114) | TNM for<br>cohort<br>Stage I – 24<br>Stage II – 56<br>Stage III – 74<br>Stage IV – 96             | SMA and SMAi at<br>L3 | CT of L3                                                          | Cross-sectional | Nil                            | Prevalence of<br>sarcopenic obesity<br>and chemotherapy<br>toxicity in this<br>cohort<br><br>OS = obese<br>sarcopenic<br><br>ONonS = obese | SMA in OS 128.1±29.1,<br>ONonS 160±38.1,<br>p<0.0001<br><br>SMAi in OS 43.3±6.3,<br>ONonS 56.4±9.9;<br><br>Median survival assoc          |

|                                  |                                          |                                                                          |           |                    |                                 |     |                                                                                |                                                                                               |
|----------------------------------|------------------------------------------|--------------------------------------------------------------------------|-----------|--------------------|---------------------------------|-----|--------------------------------------------------------------------------------|-----------------------------------------------------------------------------------------------|
|                                  |                                          |                                                                          |           |                    |                                 |     | non-sarcopenic                                                                 | with sarcopenia log rank, p<0.0001, OS 11.3months and ONonS 21.6 months, p<0.0001             |
| <b>Kilgour 2010 (53)</b>         | N=84, with LC 16 (19%) of cohort (48/36) | Metastatic 57%, locally advanced 43%, stage NR                           | SMMI, ALM | DEXA               | Cross-sectional                 | Nil | Relationship of fatigue to muscle mass and strength                            | Brief fatigue index associated with SMMI (95% CI -8.4 to -1.3) p<0.01, and sarcopenia, p<0.01 |
| <b>Peddle-McIntyre 2012 (56)</b> | 17 (7,10)                                | NSCLC n=16<br>Stage I-II – 11<br>Stage III – 5<br>Limited stage SCLC n=1 | LBM, ALM  | DEXA               | Longitudinal, duration 10 weeks | Nil | Resistance exercise training efficacy and feasibility in lung cancer survivors | LBM and ALM no change from baseline to post training, all p=NS                                |
| <b>Bauer 2004 (75)</b>           | N=7, with NSCLC 2 (28.6%) of cohort      | Adenocarcinoma pancreas n=5, NSCLC n=2<br>Stage NR                       | LBM       | Deuterium dilution | Longitudinal, duration 10 weeks | Nil | Effect of nutrition counselling and EPA supplements on body composition        | Change in LBM post intervention, p=NS                                                         |
| <b>Fearon 2006</b>               | 518                                      | LC n=231                                                                 | LBM       | BIA                | RCT (Double                     | Nil | Effect of 2g and 4g                                                            | Group given 2g EPA                                                                            |

|                         |                                     |                                                                                                |           |          |                                                    |                                         |                                                                                      |                                                                                                                                                                                                                  |
|-------------------------|-------------------------------------|------------------------------------------------------------------------------------------------|-----------|----------|----------------------------------------------------|-----------------------------------------|--------------------------------------------------------------------------------------|------------------------------------------------------------------------------------------------------------------------------------------------------------------------------------------------------------------|
| (28)                    | (355/163)                           | Upper GI cancer<br>n=198<br><br>Other GI cancer n=89<br><br>Stage NR                           |           |          | blind, placebo controlled, randomised)             |                                         | doses of EPA diester vs placebo in the process of cachexia                           | gained mean 0.9kg LBM and group given 4g EPA lost mean 0.1kg LBM compared to placebo (p=NS)                                                                                                                      |
| <b>Tozer 2008 (54)</b>  | 66 (49/17); only 35 completed study | All LC<br><br>Stage NR                                                                         | BCM       | NR       | RCT (Double blind, placebo controlled, randomised) | Nil                                     | Effect of cysteine-rich protein supplement on body weight and body cell mass         | Cysteine group +11.55±18.05% vs control group<br><br>-5.47±34.63% after treatment (p=0.01), and compared to baseline (p=0.02)                                                                                    |
| <b>Murphy 2010 (76)</b> | 41 (19/22)                          | NSCLC in all<br><br>Stage I – 2<br><br>Stage II – 2<br><br>Stage III – 13<br><br>Stage IV – 24 | SMA at L3 | CT of L3 | Longitudinal, cohort study over 2.5 months         | Nil                                     | Relationship between muscle mass, rate of muscle mass change, and plasma fatty acids | Sarcopenia at baseline in 63% men and 59% women;<br><br>Sarcopenic patients had lower plasma EPA (p=0.001), lower plasma DHA (p=0.003), and lower n-3 Fatty Acids (p=0.002) compared to non-sarcopenic patients. |
| <b>Murphy 2011 (77)</b> | 40 (21/19)                          | NSCLC in all                                                                                   | SMA at L3 | CT of L3 | Longitudinal, duration 6 weeks                     | Nil controls; cohort divided into those | Effect of fish oil (FO) on body composition                                          | Sarcopenic at baseline FO 46%, SC 46%;<br><br>Muscle loss rate per                                                                                                                                               |

1  
2  
3  
4  
5  
6  
7  
8  
9  
10  
11  
12  
13  
14  
15  
16  
17  
18  
19  
20  
21  
22  
23  
24  
25  
26  
27  
28  
29  
30  
31  
32  
33  
34  
35  
36  
37  
38  
39  
40  
41  
42  
43  
44  
45  
46  
47  
48  
49

|                            |                  |                                                                                              |                  |                                             |                                 |                                                                |                                                                                                              |                                                                                                                                                                                                        |                                                                                                                                                         |
|----------------------------|------------------|----------------------------------------------------------------------------------------------|------------------|---------------------------------------------|---------------------------------|----------------------------------------------------------------|--------------------------------------------------------------------------------------------------------------|--------------------------------------------------------------------------------------------------------------------------------------------------------------------------------------------------------|---------------------------------------------------------------------------------------------------------------------------------------------------------|
|                            |                  | Stage III – 13                                                                               |                  |                                             |                                 |                                                                |                                                                                                              |                                                                                                                                                                                                        |                                                                                                                                                         |
|                            |                  | Stage IV – 27                                                                                |                  |                                             | Open label study                | receiving fish oil (FO) n=17 and standard care (SC) n=24       |                                                                                                              |                                                                                                                                                                                                        | 100d, FO 0.1±1.6%, SC -6.8 ±2.6%, p<0.05; Positive relationship between plasma EPA concentration and rate of muscle gain, r <sup>2</sup> =0.55, p=0.01. |
| <u>Winter 2012 (78)</u>    | <u>10 (10/0)</u> | <u>NSCLC in all</u><br><u>Stage IIIA – 2</u><br><u>Stage IIIB – 3</u><br><u>Stage IV – 5</u> | <u>LBM, AMMi</u> | <u>DEXA</u>                                 | <u>Longitudinal</u>             | <u>n=10</u><br><u>healthy men</u>                              | <u>Effect on protein anabolism in response to hyperaminoacidemia, in cachexic insulin resistant patients</u> | <u>Mean AMMi cancer group defined as sarcopenic, p=NS;</u><br><u>Hyperaminoacidaemia stimulates a normal anabolic protein response, p&lt;0.05</u>                                                      |                                                                                                                                                         |
| <b>Agteresch 2002 (50)</b> | N=58 (38/20)     | NSCLC in all including controls (RCT).                                                       | FFM, MUAC, BCM   | Four skinfold thickness, deuterium dilution | Longitudinal, duration 28 weeks | Randomised to ATP group n=28, to control group n=30, all NSCLC | Effect of ATP on body composition                                                                            | FFM -0.5kg in controls, but +0.1kg in ATP group, between group difference p=0.02<br><br>MUAC -1.8% in controls, but +1.1% in ATP group, between group difference p=0.02<br><br>BCM -0.6% per 4weeks in |                                                                                                                                                         |

controls, but -0.1% in ATP group, between group diff p=0.054

|                         |                                                                |                                                                                                      |      |                        |                                           |                                                                                        |                                                  |                                                                                                                                                                                              |
|-------------------------|----------------------------------------------------------------|------------------------------------------------------------------------------------------------------|------|------------------------|-------------------------------------------|----------------------------------------------------------------------------------------|--------------------------------------------------|----------------------------------------------------------------------------------------------------------------------------------------------------------------------------------------------|
| <b>Beijer 2009 (79)</b> | N=100, with LC n=44.<br><br>n=57 completed 8-week study period | LC in 44% (most frequent), colon cancer 13%, various other cancers 43%<br><br>Stage NR "preterminal" | MUAC | Upper arm measurements | Longitudinal, duration 8 weeks<br><br>RCT | Baseline: ATP n=51, Standard care (SC) n=49;<br><br>Completed study: ATP n=29, SC n=28 | Effect of ATP on nutritional status and survival | Post ATP loss of MUAC<br>-2.24mm, SC group<br>-1.52mm, p=NS<br><br>Short term 0-8wks survival benefit with ATP (HR 0.17, p=0.023), and long term 0-6mths survival benefit (HR 0.35, p=0.025) |
|-------------------------|----------------------------------------------------------------|------------------------------------------------------------------------------------------------------|------|------------------------|-------------------------------------------|----------------------------------------------------------------------------------------|--------------------------------------------------|----------------------------------------------------------------------------------------------------------------------------------------------------------------------------------------------|

**Keys:** FFM – fat free mass, FFMi – fat free mass index, MUAC – mid upper arm circumference, TSFT – triceps skinfold thickness, AMA – Arm muscle area, BFMAMA – bone free mid arm muscle area, BCM – body cell mass, LBM – lean body mass, ALM – appendicular lean mass, AMMi – appendicular muscle mass index, SMMI – skeletal muscle mass index, SMA at L3 or T4 – skeletal muscle area at the level of the lumbar vertebra L3 or thoracic vertebra T4, SMAi – skeletal muscle area index, LC – lung cancer, NR – not recorded, NS – non significant, ILGF – insulin like growth factor, HGS = hand grip strength, QS = quadriceps strength, DL – detectable leptin, NDL – non detectable leptin. LC – lung cancer, SCLC – small cell lung cancer, NSCLC – non-small cell lung cancer, BIA – bioelectrical impedance analysis, RCT – randomised controlled trial, CT of L3 – computed tomography of the 3<sup>rd</sup> lumbar space, DEXA – dual energy xray absorptiometry, ATP – adenosine triphosphate, REE – resting energy expenditure

~~The studies in our review expressed muscle mass in different ways; we have used the term fat-free mass (FFM) or loss of muscle mass in order to allow direct comparison. In addition, where the studies in this review defined a patient group as having sarcopenia, they did so based on loss of muscle~~

~~mass alone, without evaluation of muscle strength or performance. This needs to be taken into consideration wherever the term sarcopenia is used throughout this review.~~

In this review, many studies found that those with cachexia and/or weight loss also had coexistent loss of muscle mass (25, 28, 58, 67, 68, 71, 74). Despite this, none prospectively evaluated the impact this had on cancer outcomes, specifically relating to treatment. Three studies explored the loss of muscle mass comparing men and women, finding that a significantly greater percentage of men were sarcopenic-affected (25) (64), and that they exhibited a decreasing trend in FFM after chemotherapy compared with baseline, whereas women did not (29). Reflecting the process of loss of muscle mass in the different stages of cancer, a study of sixty pre-operative NSCLC patients with stage I and II disease showed no difference in FFM compared to controls (27), whereas in a cohort of 352 advanced cancer patients, 84% of those with cachexia had a reduced FFM (74).

The pathophysiology of loss of muscle mass in lung cancer patients is complex, as illustrated in the diversity of papers exploring this. Low FFM has been associated with low albumin and high acute phase protein concentrations (57, 58, 71), reflecting the inflammatory pathways involved. Abnormal protein metabolism is implicated in the development of sarcopenia, however in this review neither anabolic (58) nor proteolytic pathways (59) (55) had any consistent effect on loss of muscle mass. The exception to this was the lysosomal protease cathepsin-B, which was significantly increased in depleted FFM patients (59). The pathophysiology may also differ depending on disease stage and cachexia phase. There is some evidence, for example, that in pre-



1  
2  
3  
4  
5 cachectic NSCLC patients, despite weight loss, the ubiquitin-proteasome proteolytic pathway may not be activated (55, 80). Different ACE-gene  
6  
7 polymorphism allelic combinations (52) and leptin expression (70) have not been shown to have~~ad no~~ significant effects on muscle mass. Fat free mass  
8  
9 (FFM) is the major determinant of energy metabolism in humans, represented by resting energy expenditure (REE), and there exists a linear relationship  
10  
11 between REE and FFM in healthy adults (81). In lung cancer cachexia, this relationship seems to be distorted (69, 71) but results have been conflicting as to  
12  
13 whether REE contributes to the development of lung cancer cachexia (67, 68, 72, 73).  
14  
15

16  
17  
18  
19  
20 The use of CT images for diagnosis of muscle mass depletion alone showed a high prevalence of this phenomenon in NSCLC patients (25), regardless  
21  
22 of BMI and even amongst the obese (1). CT images were also used to chart progressive muscle loss over time, and to create a prognostic model for survival  
23  
24 based on weight loss, muscle mass and muscle attenuation (65, 66). The presence of muscle mass attenuation was associated with poorer functional status  
25  
26 and overall survival.  
27  
28

29  
30  
31  
32 Seven~~Nine~~ interventional studies explored the effect of either nutritional supplements or adenosine triphosphate (ATP) infusions on muscle mass  
33  
34 and function. A randomised controlled study with 518 participants, examining the effect of eicosapentaenoic acid (EPA, found in fish oil) supplements  
35  
36 revealed increased patient-rated physical functioning, but no significant change in FFM, at the end of the study period (28). A similar, smaller study of 8  
37  
38 participants concurred (75). By contrast, one study of fish oil supplementation demonstrated a reduction in the rate of loss of muscle mass; however study  
39  
40  
41

1  
2  
3  
4  
5  
6  
7  
8  
9  
10  
11  
12  
13  
14  
15  
16  
17  
18  
19  
20  
21  
22  
23  
24  
25  
26  
27  
28  
29  
30  
31  
32  
33  
34  
35  
36  
37  
38  
39  
40  
41  
42  
43  
44  
45  
46  
47  
48  
49

numbers were small – 40 patients in total. In addition, those considered sarcopenic were found to have lower plasma fatty acids than those without, in a study with 41 NSCLC patients (76, 77). An interventional randomised controlled study with 66 participants found that cysteine-rich protein supplements increased FFM, as well as hand-grip strength (HGS), compared to conventional protein supplements (54), and a small case-control study with 10 patients found that hyperaminoacidaemia stimulated a normal anabolic protein response even in the presence of insulin resistance, in patients with cancer cachexia (78). Two randomised controlled studies investigating the effect of ATP infusions on body composition gave conflicting reports, one (N=58) finding that ATP slowed the rate of loss of muscle mass (50) while the other (N=100) did not (79).-Only the study by Fearon et al (28)\_described power calculations to detect a statistically significant difference.

*Degree of sarcopenia or loss of muscle mass and physical functioning*

Table 34: Degree of loss of muscle mass and physical functioning

| Authors        | Patients   |               | Study                                        |                       |                 | Comparison      | Result                                         |                                                                          |
|----------------|------------|---------------|----------------------------------------------|-----------------------|-----------------|-----------------|------------------------------------------------|--------------------------------------------------------------------------|
|                | No, (M/F)  | Tumour, Stage | Muscle Function and Muscle Mass Measurements | Method of Measurement | Design          |                 |                                                | Controls                                                                 |
| Jago 2001 (27) | 60 (43/17) | LC in all     | Grip strength Z-score                        | HKA dynamometer       | Cross-sectional | n=22, mild COPD | Nutritional status of patients undergoing lung | Grip strength in absolute terms or Z-score no difference LC vs controls, |

|                              |                                                  |                                                                       | FFM, MAMC, BFMAMA                                                     | BIA, four skinfold-thickness, upper arm measurements |                                                    |     | cancer operations                                                                                          | p=NS                                                                                                                      |
|------------------------------|--------------------------------------------------|-----------------------------------------------------------------------|-----------------------------------------------------------------------|------------------------------------------------------|----------------------------------------------------|-----|------------------------------------------------------------------------------------------------------------|---------------------------------------------------------------------------------------------------------------------------|
| <b>Fearon 2006 (28)</b>      | 518 (355/163)                                    | LC n=231<br>Upper GI cancer n=198<br>Other GI cancer n=89<br>Stage NR | LBM                                                                   | BIA                                                  | RCT (Double blind, placebo controlled, randomised) | Nil | Effect of 2g and 4g doses of EPA diester vs placebo in the process of cachexia                             | No difference in FFMi and BFMAMA comparing LC and controls, all p=NS                                                      |
| <b>Tozer 2008 (54)</b>       | 66 (49/17); only 35 completed study              | All LC<br>Stage NR                                                    | BCM                                                                   | NR                                                   | RCT (Double blind, placebo controlled, randomised) | Nil | Effect of cysteine-rich protein supplement on body weight and body cell mass                               | Handgrip force improved by +12.41±16.52% in cysteine group compared to baseline (p=0.019)                                 |
| <b>Trutschnigg 2008 (17)</b> | 81 (NR/NR)<br>74 completed muscle function tests | Advanced NSCLC and Gastro-intestinal cancer patients, breakdown       | Handgrip strength<br>In Newton metre for Biodex, and pounds for Jamar | Jamar and Biodex dynamometer (n=74 completed)        | Cross-sectional                                    | Nil | Relationship between DEXA and BIA, and Jamar and Biodex dynamometry and their precision in advanced cancer | Biodex HGS Mean±SD:<br>Men 47.8±13.6 vs Women 32.7±9.3, p<0.05<br>Jamar HGS Mean±SD:<br>Men 78.5±21.6 vs Women 49.7±13.5, |

1  
2  
3  
4  
5  
6  
7  
8  
9  
10  
11  
12  
13  
14  
15  
16  
17  
18  
19  
20  
21  
22  
23  
24  
25  
26  
27  
28  
29  
30  
31  
32  
33  
34  
35  
36  
37  
38  
39  
40  
41  
42  
43  
44  
45  
46  
47  
48  
49

|                              |                                                      |                                                            |                                                                                     |                                |                     |     |                                                                                                                   |                                                                                                                                                                                                                                                          |
|------------------------------|------------------------------------------------------|------------------------------------------------------------|-------------------------------------------------------------------------------------|--------------------------------|---------------------|-----|-------------------------------------------------------------------------------------------------------------------|----------------------------------------------------------------------------------------------------------------------------------------------------------------------------------------------------------------------------------------------------------|
|                              | (48/26)                                              | NR                                                         |                                                                                     |                                |                     |     | patients                                                                                                          | p<0.001;<br><br>%CV biodex 16.7%,<br>Jamar 6.3%<br><br>Wide limits of agreement<br>in determining FFM,<br>DEXA vs BIA, p=NS, but<br>low %CV for FFM DEXA<br>(0.79) and BIA (0.42)                                                                        |
| <b>Kilgour 2010<br/>(53)</b> | N=84, with<br>LC 16<br>(19%) of<br>cohort<br>(48/36) | Metastatic<br>57%, locally<br>advanced<br>43%, stage<br>NR | Handgrip strength<br>(HGS) in kg,<br>Quadriceps<br>strength (QS) in<br>Newton metre | Jamar (HGS)<br>and Biodex (QS) | Cross-<br>sectional | Nil | Relationship of<br>fatigue to muscle<br>mass and strength                                                         | HGS on Fatigue, 95% CI -<br>1.1 to -0.15, p<0.05;<br><br>QS on Fatigue, 95% CI -<br>0.2 to -0.01 , p<0.05;<br><br>SMMI, ALM<br><br>DEXA<br><br>Brief fatigue index<br>associated with SMMI<br>(95% CI -8.4 to -1.3)<br>p<0.01, and sarcopenia,<br>p<0.01 |
| <b>Vigano 2009<br/>(52)</b>  | N=172<br>(101/71)                                    | NSCLC n=64,<br>Stage III and<br>IV,<br>breakdown           | Handgrip force and<br>percentile                                                    | Jamar<br>dynamometer           | Cross-<br>sectional | Nil | ACE gene<br>polymorphism<br>(insertion <sup>2</sup> -II,<br>insertion/deletion-<br>ID, deletion <sup>2</sup> -DD) | DD allele group showed<br>greater handgrip force<br>and grip percentile than<br>II group, p<0.05; but no<br>difference in LBM or ALM                                                                                                                     |

|                                            |                  |                                                                         |                                                                                                                                                   |                                  |                                 |                               |                                                                                |                                                                                                                                                                                         |
|--------------------------------------------|------------------|-------------------------------------------------------------------------|---------------------------------------------------------------------------------------------------------------------------------------------------|----------------------------------|---------------------------------|-------------------------------|--------------------------------------------------------------------------------|-----------------------------------------------------------------------------------------------------------------------------------------------------------------------------------------|
|                                            |                  | NR                                                                      |                                                                                                                                                   |                                  |                                 |                               | on nutritional status                                                          | p=NS                                                                                                                                                                                    |
|                                            |                  | Metastatic GI cancer n=108                                              | LBM, ALM                                                                                                                                          | DEXA (n=64)                      |                                 |                               |                                                                                | Trend (p=0.07) towards lower LBM in ID compared to II groups                                                                                                                            |
| <b>Peddle-McIntyre 2012 (56)</b>           | 17 (7,10)        | NSCLC n=16<br>Stage I-II –11<br>Stage III – 5<br>Limited stage SCLC n=1 | Chest press, Leg press, functional performance measure [6MWD – six minute walk distance, Get-up-and-go (GUAG), chair stands and arm curls in 30s] | 1 Repetition-maximum (1RM) in kg | Longitudinal, duration 10 weeks | Nil                           | Resistance exercise training efficacy and feasibility in lung cancer survivors | Mean change from baseline to end of training in 95% CI: Chest press 12.3-17.5, Leg press 23.5-39.8, 6MWD 48-124, GUAG -0.4 to -1.2, chair stands 2.3-6.1, arm curls 2.1-5.1, all p<0.05 |
|                                            |                  |                                                                         | LBM, ALM                                                                                                                                          | DEXA                             |                                 |                               |                                                                                | LBM and ALM no change from baseline to post training, all p=NS                                                                                                                          |
| <b><u>Martinez-Hernandez 2012 (61)</u></b> | <u>21 (19/2)</u> | <u>Lung cancer n=13, GI cancer n=6, Other cancer n=2</u>                | <u>Handgrip strength (HGS) and treadmill 6 minute walk test (6MWT)</u>                                                                            | <u>BIA</u>                       | <u>Longitudinal</u>             | <u>n=8 healthy volunteers</u> | <u>The role of interleukin-15 (IL-15) in cachectic cancer patients</u>         | <u>HGS no difference comparing cachectic group to controls, p=NS;</u>                                                                                                                   |

|                              |           |                                                                    |                                                    |                                                                |                 |                           |                                                                                  |                                                                                                                                             |
|------------------------------|-----------|--------------------------------------------------------------------|----------------------------------------------------|----------------------------------------------------------------|-----------------|---------------------------|----------------------------------------------------------------------------------|---------------------------------------------------------------------------------------------------------------------------------------------|
|                              |           | <a href="#">Stage according to tumour group NR</a>                 | <a href="#">FFM</a>                                |                                                                |                 |                           |                                                                                  | <a href="#">6MWT in cachectic group 369±73m vs 474±57m, p&lt;0.05</a>                                                                       |
| <b>Op den Kamp 2012 (55)</b> | 16 (15/1) | NSCLC in all<br>Stage I-II –11<br>Stage IIIA – 2<br>Stage IIIB – 3 | Intensity of physical activity<br><br><br><br>FFMi | Triaxial accelerometer (Tracmor) in counts/min<br><br><br>DEXA | Cross-sectional | n=10 healthy volunteers   | Skeletal muscle ubiquitin proteasome system activity in pre-cachexia             | High intensity physical activity in LC vs controls p=0.049;<br><br>FFMi no significant difference in pre-cachectic cancer vs controls, p=NS |
| <b>Op den Kamp 2013 (62)</b> | 26 (17/9) | NSCLC<br>Stage IIIB – 10<br>Stage IV – 16                          | Quadriceps strength (QS)<br><br>FFMi, AMMi         | DEXA                                                           | Cross-sectional | n = 10 healthy volunteers | Expression of signalling molecules in protein metabolism in lung cancer cachexia | QS 31% lower in cachectic group compared to controls, p<0.05                                                                                |

Keys: : FFM – fat free mass, FFMi – fat free mass index, MUAC – mid upper arm circumference, TSFT – triceps skinfold thickness, AMA – Arm muscle area, BFMAMA – bone free mid arm muscle area, BCM – body cell mass, LBM – lean body mass, ALM – appendicular lean mass, SMMI – skeletal muscle mass index, SMA – skeletal muscle area, LC – lung cancer, NR – not recorded, NS – non significant, HGS – handgrip strength, QS – quadriceps strength, LC – lung cancer, NSCLC – non-small cell lung cancer, SCLC – small cell lung cancer, EPA – eicosapentaenoic acid, DEXA – dual energy xray absorptiometry, BIA – bioelectrical impedance analysis, ACE – angiotensin converting enzyme.

There was very little direct evaluation of the relationship between muscle mass and muscle function. However, the studies that evaluated muscle mass alongside muscle function show that there is limited correlation. Muscle strength seemed to be affected, regardless of loss of muscle mass. In pre-

1  
2  
3  
4  
5 cachectic patients, exercise capacity was significantly reduced, despite maintenance of muscle mass (55), and resistance exercise training increased all  
6  
7 parameters of muscle strength and physical performance, with no difference to muscle mass (56). In this review, cachectic patients showed reduced  
8  
9 strength in terms of walking distance (61) and quadriceps strength (62) compared to controls.  
10  
11  
12  
13  
14

## 15 Discussion

16  
17  
18  
19  
20  
21 Loss of muscle mass, as part of a weight-losing syndrome, is a central feature of cancer cachexia. However, changes in muscle mass, and/or  
22  
23 performance, may pre-date clinically overt cachexia, as part of aging or secondary to inflammation/disuse. This implies that consideration of both muscle  
24  
25 mass and function, rather than weight loss alone, is clinically important. Understanding this relationship, and the factors associated with each, will provide  
26  
27 opportunities for focused intervention to improve clinical outcomes.  
28  
29  
30  
31  
32  
33

34 The findings of our review highlight several important issues. Whilst studies exploring molecular and metabolic factors associated with loss of  
35  
36 muscle mass have contributed to a better understanding of the pathophysiology of cancer cachexia, there remains considerable uncertainty in relation to  
37  
38 mechanisms. Our review in lung cancer patients demonstrates inconsistency of findings as to the factors implicated in the development of cachexia,  
39  
40  
41  
42  
43  
44  
45

1  
2  
3  
4  
5 compared to other cancer sites. It highlights the lack of clear therapeutic targets and emphasises the need for concerted, appropriately-sized exploration of  
6  
7 predictive and prognostic factors in lung cancer cachexia.  
8  
9

10  
11  
12  
13 This uncertainty with regard to precise pathophysiological mechanisms is reflected in the lack of consistent effect of interventions aimed at slowing  
14 the rate of loss of muscle mass and improving muscle function in lung cancer. Studies reviewed which refer to cachexia management support a multimodal  
15 approach, including targeted exercise, nutritional counselling, social support and pharmacological ~~eutical~~ intervention (82). This review highlights inherent  
16 challenges of such an approach, with nutritional interventions in particular failing to demonstrate efficacy (83), although the role of exercise is emerging  
17 (56, 84). It also suggests the need to represent NSCLC patients adequately within trials of new interventions, such as myostatin antibody therapies, rather  
18 than assuming a class effect across tumour sites.  
19  
20  
21  
22  
23  
24  
25  
26  
27  
28  
29

30 Strikingly, our review has demonstrated that, to date, there has not been due attention to the concept of sarcopenia as a distinct, if overlapping  
31 syndrome, in a condition affecting a largely elderly population. It also highlights the difficulty in making comparisons between studies, due to the  
32 heterogeneity of methods employed in measuring muscle mass, and in cut-off values for defining sarcopenia. ~~These~~ Current standardised values were  
33 derived from a large elderly cohort and the cut-off values based on healthy young adult reference values. These values have been used to define  
34 sarcopenia in cancer (13, 85), including one in this review (53). The relevance of this definition to cancer patients is debatable, for a number of reasons.  
35  
36  
37  
38  
39  
40  
41  
42  
43  
44  
45



1  
2  
3  
4  
5 Firstly, sarcopenia manifests in cancer patients of all ages and is not isolated to the elderly alone. Secondly, the pathophysiology of sarcopenia in cancer  
6  
7 patients may differ at least in part to that of the non-cancer elderly population (86). With this in mind, the more recent international consensus document  
8  
9 recommending a reference value of absolute muscularity below the 5<sup>th</sup> centile is to be welcomed (13). Finally, the recognition of muscle strength and  
10  
11 performance as a defining component of sarcopenia in the elderly needs consideration, within the context of cancer cachexia—secondary causes—including  
12  
13 cancer.  
14  
15  
16  
17  
18  
19

20 The argument for the objective evaluation of physical performance is pertinent, particularly as part of the definitive assessment of sarcopenia  
21  
22 alongside ~~with~~ measurements of muscle mass. Currently, physical fitness for treatment is determined largely by the performance status (PS) score. This  
23  
24 score is imperfect as it is subjective, with reports of inter-observer variability (87), and there is only a modest correlation between PS and observed physical  
25  
26 performance (88). Inter-clinician performance status discordance has led to a lower percentage of PS 0 and 1 patients appearing to get chemotherapy (89),  
27  
28 and has led to a call for objective evaluation of physical functioning (90). Some proposed methods include tests of gait speed and muscle strength. It is  
29  
30 postulated that objective measures of muscle mass and strength together may complement, or even outperform performance status as a predictor of  
31  
32 fitness for systemic treatment, provided that they can be readily performed in routine clinical settings, and more successful completion thereof.  
33  
34  
35  
36  
37  
38  
39  
40  
41  
42  
43  
44  
45  
46  
47  
48  
49

Our review has several limitations. The heterogeneity of the studies included in this review made it difficult to account for individual risk of bias, not least because we included a broad range ~~of types~~ of studies from large randomised controlled trials to small observational studies. This limitation also means that some papers included in this review, whilst being relevant to sarcopenia, were more broadly related to muscle mass outcomes in cancer cachexia, rather than assessing sarcopenia directly. ~~The inclusion of a wide range of studies was necessary as this is the first systematic review of sarcopenia in lung cancer, to the best of our knowledge.~~ Our search also was limited to studies published in English, and although our review included some studies with negative or inconclusive findings, there may indeed exist some publication bias for which we are unable to account.

The paper by Temel et al, which demonstrated that early palliative care involvement increased patient survival, as well as quality of life, has highlighted the importance of supportive measures in a poor-prognosis population receiving active oncological intervention (91). As such, focusing research on the identification and management of sarcopenia in lung cancer patients may prove to be a tolerable and cost effective adjunct to current lung cancer care.

Whilst development of a clearer definition of cancer cachexia provides an additional component of a robust, objective clinical framework for stratification of patients for focused interventions, the enhanced role of muscle strength/performance as a defining assessment of sarcopenia requires attention. A standardised definition of cancer-related sarcopenia which can be used clinically and in the research setting will harmonise reporting, allowing

1  
2  
3  
4  
5 for direct comparison of results as well as meta-analysis of data. In the era of stratified medicine, this review identifies opportunities to examine cellular  
6  
7 and genetic factors associated with sarcopenia in lung cancer NSCLC coherently and to link them with changes in tumour phenotype which impact on  
8  
9 morbidity and survival.  
10

#### 11 12 13 14 15 16 17 18 **Conflict of interest statement**

19  
20  
21 None declared.  
22  
23  
24  
25  
26

#### 27 **Acknowledgements**

28  
29  
30 Jemima Collins is funded by Cardiff and Vale University Health Board under the Clinical Research Fellowship scheme.  
31  
32  
33  
34  
35

#### 36 **References**

37  
38  
39  
40  
41  
42  
43  
44  
45  
46  
47  
48  
49

1. Prado CM, Lieffers JR, McCargar LJ, Reiman T, Sawyer MB, Martin L, et al. Prevalence and clinical implications of sarcopenic obesity in patients with solid tumours of the respiratory and gastrointestinal tracts: a population-based study. *The lancet oncology*. 2008 Jul;9(7):629-35. PubMed PMID: 18539529.
2. Prado CM, Baracos VE, McCargar LJ, Reiman T, Mourtzakis M, Tonkin K, et al. Sarcopenia as a determinant of chemotherapy toxicity and time to tumor progression in metastatic breast cancer patients receiving capecitabine treatment. *Clinical cancer research : an official journal of the American Association for Cancer Research*. 2009 Apr 15;15(8):2920-6. PubMed PMID: 19351764. Epub 2009/04/09. eng.
3. Awad S, Tan BH, Cui H, Bhalla A, Fearon KC, Parsons SL, et al. Marked changes in body composition following neoadjuvant chemotherapy for oesophagogastric cancer. *Clinical nutrition (Edinburgh, Scotland)*. 2012 Feb;31(1):74-7. PubMed PMID: 21875767. Epub 2011/08/31. eng.
4. Mir O, Coriat R, Blanchet B, Durand JP, Boudou-Rouquette P, Michels J, et al. Sarcopenia predicts early dose-limiting toxicities and pharmacokinetics of sorafenib in patients with hepatocellular carcinoma. *PloS one*. 2012;7(5):e37563. PubMed PMID: 22666367. Pubmed Central PMCID: PMC3364283. Epub 2012/06/06. eng.
5. Lieffers JR, Bathe OF, Fassbender K, Winget M, Baracos VE. Sarcopenia is associated with postoperative infection and delayed recovery from colorectal cancer resection surgery. *British journal of cancer*. 2012 Sep 4;107(6):931-6. PubMed PMID: 22871883. Pubmed Central PMCID: PMC3464761. Epub 2012/08/09. eng.
6. Cruz-Jentoft AJ, Baeyens JP, Bauer JM, Boirie Y, Cederholm T, Landi F, et al. Sarcopenia: European consensus on definition and diagnosis: Report of the European Working Group on Sarcopenia in Older People. *Age and ageing*. 2010 Jul;39(4):412-23. PubMed PMID: 20392703. Pubmed Central PMCID: PMC2886201. Epub 2010/04/16. eng.
7. Janssen I, Heymsfield SB, Ross R. Low relative skeletal muscle mass (sarcopenia) in older persons is associated with functional impairment and physical disability. *Journal of the American Geriatrics Society*. 2002 May;50(5):889-96. PubMed PMID: 12028177. Epub 2002/05/25. eng.
8. Baumgartner RN, Koehler KM, Gallagher D, Romero L, Heymsfield SB, Ross RR, et al. Epidemiology of sarcopenia among the elderly in New Mexico. *American journal of epidemiology*. 1998 Apr 15;147(8):755-63. PubMed PMID: 9554417. Epub 1998/04/29. eng.
9. Landi F, Liperoti R, Fusco D, Mastropaolo S, Quattrocioni D, Proia A, et al. Sarcopenia and mortality among older nursing home residents. *Journal of the American Medical Directors Association*. 2012 Feb;13(2):121-6. PubMed PMID: 21856243. Epub 2011/08/23. eng.
10. Cherin P, Voronska E, Fraoucene N, de Jaeger C. Prevalence of sarcopenia among healthy ambulatory subjects: the sarcopenia begins from 45 years. *Aging clinical and experimental research*. 2013 Oct 16. PubMed PMID: 24129803. Epub 2013/10/17. Eng.
11. Veasey-Rodrigues H, Parsons HA, Janku F, Naing A, Wheler JJ, Tsimberidou AM, et al. A pilot study of temsirolimus and body composition. *J Cachexia Sarcopenia Muscle*. 2013 Jul 27. PubMed PMID: 23893509. Epub 2013/07/31. Eng.
12. Harimoto N, Shirabe K, Yamashita YI, Ikegami T, Yoshizumi T, Soejima Y, et al. Sarcopenia as a predictor of prognosis in patients following hepatectomy for hepatocellular carcinoma. *The British journal of surgery*. 2013 Oct;100(11):1523-30. PubMed PMID: 24037576. Epub 2013/09/17. eng.
13. Fearon K, Strasser F, Anker SD, Bosaeus I, Bruera E, Fainsinger RL, et al. Definition and classification of cancer cachexia: an international consensus. *The lancet oncology*. 2011 May;12(5):489-95. PubMed PMID: 21296615. Epub 2011/02/08. eng.

14. Janssen I, Baumgartner RN, Ross R, Rosenberg IH, Roubenoff R. Skeletal muscle cutpoints associated with elevated physical disability risk in older men and women. *American journal of epidemiology*. 2004 Feb 15;159(4):413-21. PubMed PMID: 14769646. Epub 2004/02/11. eng.
15. Goodpaster BH, Park SW, Harris TB, Kritchevsky SB, Nevitt M, Schwartz AV, et al. The loss of skeletal muscle strength, mass, and quality in older adults: the health, aging and body composition study. *The journals of gerontology Series A, Biological sciences and medical sciences*. 2006 Oct;61(10):1059-64. PubMed PMID: 17077199. Epub 2006/11/02. eng.
16. Kendler DL, Borges JL, Fielding RA, Itabashi A, Krueger D, Mulligan K, et al. The Official Positions of the International Society for Clinical Densitometry: Indications of Use and Reporting of DXA for Body Composition. *Journal of clinical densitometry : the official journal of the International Society for Clinical Densitometry*. 2013 Oct-Dec;16(4):496-507. PubMed PMID: 24090645. Epub 2013/10/05. eng.
17. Trutschnigg B, Kilgour RD, Reinglas J, Rosenthal L, Hornby L, Morais JA, et al. Precision and reliability of strength (Jamar vs. Biodex handgrip) and body composition (dual-energy X-ray absorptiometry vs. bioimpedance analysis) measurements in advanced cancer patients. *Applied physiology, nutrition, and metabolism = Physiologie appliquee, nutrition et metabolisme*. 2008 Dec;33(6):1232-9. PubMed PMID: 19088782.
18. Landi F, Russo A, Liperoti R, Pahor M, Tosato M, Capoluongo E, et al. Midarm muscle circumference, physical performance and mortality: results from the aging and longevity study in the Sirente geographic area (iLSIRENTE study). *Clinical nutrition (Edinburgh, Scotland)*. 2010 Aug;29(4):441-7. PubMed PMID: 20116909. Epub 2010/02/02. eng.
19. Freiburger E, de Vreede P, Schoene D, Rydwick E, Mueller V, Frandin K, et al. Performance-based physical function in older community-dwelling persons: a systematic review of instruments. *Age and ageing*. 2012 Nov;41(6):712-21. PubMed PMID: 22885845. Epub 2012/08/14. eng.
20. Greendale GA, DeAmicis TA, Bucur A, Bretsky P, Rowe JW, Reuben DB, et al. A prospective study of the effect of fracture on measured physical performance: results from the MacArthur Study--MAC. *Journal of the American Geriatrics Society*. 2000 May;48(5):546-9. PubMed PMID: 10811548. Epub 2000/05/16. eng.
21. Ferlay J, Shin HR, Bray F, Forman D, Mathers C, Parkin DM. Estimates of worldwide burden of cancer in 2008: GLOBOCAN 2008. *International journal of cancer Journal international du cancer*. 2010 Dec 15;127(12):2893-917. PubMed PMID: 21351269. Epub 2011/02/26. eng.
22. Rachet B, Woods LM, Mitry E, Riga M, Cooper N, Quinn MJ, et al. Cancer survival in England and Wales at the end of the 20th century. *British journal of cancer*. 2008 Sep 23;99 Suppl 1:S2-10. PubMed PMID: 18813248. Pubmed Central PMCID: PMC2557545. Epub 2008/10/01. eng.
23. Vinod SK, Sidhom MA, Gabriel GS, Lee MT, Delaney GP. Why do some lung cancer patients receive no anticancer treatment? *Journal of thoracic oncology : official publication of the International Association for the Study of Lung Cancer*. 2010 Jul;5(7):1025-32. PubMed PMID: 20453689. Epub 2010/05/11. eng.
24. Pemberton L, Sumra P, Tetlow C, Bayman N, Summers Y, Taylor P, et al. Do treatment decisions made at lung cancer multi-disciplinary team meetings (MDTs) reflect the actual treatment given in practice? *Lung cancer (Amsterdam, Netherlands)*. 2013;79:S36.
25. Baracos VE, Reiman T, Mourtzakis M, Gioulbasanis I, Antoun S. Body composition in patients with non-small cell lung cancer: a contemporary view of cancer cachexia with the use of computed tomography image analysis. *The American journal of clinical nutrition*. 2010 Apr;91(4):1133S-7S. PubMed PMID: 20164322.

26. Villaseñor A, Ballard-Barbash R, Baumgartner K, Baumgartner R, Bernstein L, McTiernan A, et al. Prevalence and prognostic effect of sarcopenia in breast cancer survivors: the HEAL Study. *Journal of cancer survivorship : research and practice*. 2012 Dec;6(4):398-406. PubMed PMID: 23054848. Epub 2012/10/12. eng.
27. Jagoe RT, Goodship TH, Gibson GJ. Nutritional status of patients undergoing lung cancer operations. *The Annals of thoracic surgery*. 2001 Mar;71(3):929-35. PubMed PMID: 11269476. Epub 2001/03/28. eng.
28. Fearon KC, Barber MD, Moses AG, Ahmedzai SH, Taylor GS, Tisdale MJ, et al. Double-blind, placebo-controlled, randomized study of eicosapentaenoic acid diester in patients with cancer cachexia. *Journal of clinical oncology : official journal of the American Society of Clinical Oncology*. 2006 Jul 20;24(21):3401-7. PubMed PMID: 16849754. Epub 2006/07/20. eng.
29. Harvie MN, Campbell IT, Thatcher N, Baildam A. Changes in body composition in men and women with advanced nonsmall cell lung cancer (NSCLC) undergoing chemotherapy. *Journal of human nutrition and dietetics : the official journal of the British Dietetic Association*. 2003 Oct;16(5):323-6. PubMed PMID: 14516379. Epub 2003/10/01. eng.
30. Sanchez-Lara K, Turcott JG, Juarez E, Guevara P, Nunez-Valencia C, Onate-Ocana LF, et al. Association of nutrition parameters including bioelectrical impedance and systemic inflammatory response with quality of life and prognosis in patients with advanced non-small-cell lung cancer: a prospective study. *Nutrition and cancer*. 2012;64(4):526-34. PubMed PMID: 22489794. Epub 2012/04/12. eng.
31. Granger CL, McDonald CF, Parry SM, Oliveira CC, Denehy L. Functional capacity, physical activity and muscle strength assessment of individuals with non-small cell lung cancer: a systematic review of instruments and their measurement properties. *BMC cancer*. 2013;13:135. PubMed PMID: 23514337. Pubmed Central PMCID: PMC3623892. Epub 2013/03/22. eng.
32. Blum D, Omlin A, Baracos VE, Solheim TS, Tan BH, Stone P, et al. Cancer cachexia: a systematic literature review of items and domains associated with involuntary weight loss in cancer. *Critical reviews in oncology/hematology*. 2011 Oct;80(1):114-44. PubMed PMID: 21216616.
33. Bruera E, Ernst S, Hagen N, Spachynski K, Belzile M, Hanson J, et al. Effectiveness of megestrol acetate in patients with advanced cancer: A randomized, double-blind, crossover study. *Cancer Prevention and Control*. 1998;2(2):74-8. PubMed PMID: 1998162517.
34. Lindsey AM, Piper BF. Anorexia and weight loss: indicators of cachexia in small cell lung cancer. *Nutrition and cancer*. 1985;7(1-2):65-76. PubMed PMID: 2999721.
35. Wolf RF, Pearlstone DB, Newman E, Heslin MJ, Gonenne A, Burt ME, et al. Growth hormone and insulin reverse net whole body and skeletal muscle protein catabolism in cancer patients. *Annals of Surgery*. 1992;216(3):280-90. PubMed PMID: 1992302056.
36. Gioulbasanis I, Baracos VE, Giannousi Z, Xyrafas A, Martin L, Georgoulas V, et al. Baseline nutritional evaluation in metastatic lung cancer patients: Mini Nutritional Assessment versus weight loss history. *Annals of oncology : official journal of the European Society for Medical Oncology / ESMO*. 2011 Apr;22(4):835-41. PubMed PMID: 20937647. Epub 2010/10/13. eng.
37. Jamieson NB, Brown DJ, Michael Wallace A, McMillan DC. Adiponectin and the systemic inflammatory response in weight-losing patients with non-small cell lung cancer. *Cytokine*. 2004 Jul 21-Aug 7;27(2-3):90-2. PubMed PMID: 15242698. Epub 2004/07/10. eng.
38. Melville S, McNurlan MA, Calder AG, Garlick PJ. Increased protein turnover despite normal energy metabolism and responses to feeding in patients with lung cancer. *Cancer research*. 1990 Feb 15;50(4):1125-31. PubMed PMID: 2297761. Epub 1990/02/15. eng.

- 1  
2  
3  
4  
5 39. Richards EW, Long CL, Nelson KM, Tohver OK, Pinkston JA, Navari RM, et al. Protein turnover in advanced lung cancer patients. *Metabolism: clinical and experimental*. 1993 Mar;42(3):291-6. PubMed PMID: 8487646. Epub 1993/03/01. eng.
- 6  
7 40. Staal-van den Brekel AJ, Schols AM, Dentener MA, ten Velde GP, Buurman WA, Wouters EF. Metabolism in patients with small cell lung carcinoma compared with patients with non-small cell lung carcinoma and healthy controls. *Thorax*. 1997 Apr;52(4):338-41. PubMed PMID: 9196516. Pubmed Central PMCID: PMC1758535. Epub 1997/04/01. eng.
- 8  
9 41. Staal-van den Brekel AJ, Schols AM, ten Velde GP, Buurman WA, Wouters EF. Analysis of the energy balance in lung cancer patients. *Cancer research*. 1994 Dec 15;54(24):6430-3. PubMed PMID: 7987838. Epub 1994/12/15. eng.
- 10  
11 42. van der Meij BS, Schoonbeek CP, Smit EF, Muscaritoli M, van Leeuwen PA, Langius JA. Pre-cachexia and cachexia at diagnosis of stage III non-small-cell lung carcinoma: an exploratory study comparing two consensus-based frameworks. *The British journal of nutrition*. 2012 Nov 16:1-9. PubMed PMID: 23153477. Epub 2012/11/17. Eng.
- 12  
13 43. Ovesen L, Hannibal J, Mortensen EL. The interrelationship of weight loss, dietary intake, and quality of life in ambulatory patients with cancer of the lung, breast, and ovary. *Nutrition and cancer*. 1993;19(2):159-67. PubMed PMID: 8502586. Epub 1993/01/01. eng.
- 14  
15 44. Richards EW, Long CL, Nelson KM, Pinkston JA, Navari RM, Geiger JW, et al. Glucose metabolism in advanced lung cancer patients. *Nutrition (Burbank, Los Angeles County, Calif)*. 1992 Jul-Aug;8(4):245-51. PubMed PMID: 1498456. Epub 1992/07/01. eng.
- 16  
17 45. Simons JP, Schols AM, Westertep KR, ten Velde GP, Wouters EF. The use of bioelectrical impedance analysis to predict total body water in patients with cancer cachexia. *The American journal of clinical nutrition*. 1995 Apr;61(4):741-5. PubMed PMID: 7702014.
- 18  
19 46. Arrieta O, Michel Ortega RM, Villanueva-Rodriguez G, Serna-Thome MG, Flores-Estrada D, Diaz-Romero C, et al. Association of nutritional status and serum albumin levels with development of toxicity in patients with advanced non-small cell lung cancer treated with paclitaxel-cisplatin chemotherapy: a prospective study. *BMC cancer*. 2010;10:50. PubMed PMID: 20170547. Pubmed Central PMCID: PMC2843671. Epub 2010/02/23. eng.
- 20  
21 47. Jatoi A, Ritter HL, Dueck A, Nguyen PL, Nikcevic DA, Luyun RF, et al. A placebo-controlled, double-blind trial of infliximab for cancer-associated weight loss in elderly and/or poor performance non-small cell lung cancer patients (N01C9). *Lung cancer*. 2010 May;68(2):234-9. PubMed PMID: 19665818. Epub 2009/08/12. eng.
- 22  
23 48. Meek CL, Wallace AM, Forrest LM, McMillan DC. The relationship between the insulin-like growth factor-1 axis, weight loss, an inflammation-based score and survival in patients with inoperable non-small cell lung cancer. *Clinical nutrition (Edinburgh, Scotland)*. 2010 Apr;29(2):206-9. PubMed PMID: 19748165. Epub 2009/09/15. eng.
- 24  
25 49. Toso S, Piccoli A, Gusella M, Menon D, Bononi A, Crepaldi G, et al. Altered tissue electric properties in lung cancer patients as detected by bioelectric impedance vector analysis. *Nutrition (Burbank, Los Angeles County, Calif)*. 2000 Feb;16(2):120-4. PubMed PMID: 10696635. Epub 2000/03/04. eng.
- 26  
27 50. Agteresch HJ, Rietveld T, Kerkhofs LG, van den Berg JW, Wilson JH, Dagnelie PC. Beneficial effects of adenosine triphosphate on nutritional status in advanced lung cancer patients: a randomized clinical trial. *Journal of clinical oncology : official journal of the American Society of Clinical Oncology*. 2002 Jan 15;20(2):371-8. PubMed PMID: 11786563. Epub 2002/01/12. eng.
- 28  
29 51. Dagnelie PC, Agteresch HJ. Promising effects of adenosine triphosphate infusion on nutritional status and quality of life in advanced non-small-cell lung cancer: A randomized clinical trial. *Drug Development Research*. 2003 01 May;59(1):146-51. PubMed PMID: 2003229377.
- 30  
31  
32  
33  
34  
35  
36  
37  
38  
39  
40  
41  
42  
43  
44  
45  
46  
47  
48  
49

- 1  
2  
3  
4  
5 52. Vigano A, Trutschnigg B, Kilgour RD, Hamel N, Hornby L, Lucar E, et al. Relationship between angiotensin-converting enzyme gene polymorphism and body composition, functional performance, and blood biomarkers in advanced cancer patients. *Clinical cancer research : an official journal of the American Association for Cancer Research*. 2009 Apr 1;15(7):2442-7. PubMed PMID: 19258445.
- 6  
7  
8 53. Kilgour RD, Vigano A, Trutschnigg B, Hornby L, Lucar E, Bacon SL, et al. Cancer-related fatigue: The impact of skeletal muscle mass and strength in patients with advanced cancer. *Journal of Cachexia, Sarcopenia and Muscle*. 2010 December;1(2):177-85. PubMed PMID: 2012370684.
- 9  
10 54. Tozer RG, Tai P, Falconer W, Ducruet T, Karabadjian A, Bounous G, et al. Cysteine-rich protein reverses weight loss in lung cancer patients receiving chemotherapy or radiotherapy. *Antioxidants & redox signaling*. 2008 Feb;10(2):395-402. PubMed PMID: 18158761. Epub 2007/12/27. eng.
- 11  
12 55. Op den Kamp CM, Langen RC, Minnaard R, Kelders MC, Snepvangers FJ, Hesselink MK, et al. Pre-cachexia in patients with stages I-III non-small cell lung cancer: Systemic inflammation and functional impairment without activation of skeletal muscle ubiquitin proteasome system. *Lung cancer*. 2012 April;76(1):112-7. PubMed PMID: 2012141803.
- 13  
14 56. Peddle-McIntyre CJ, Bell G, Fenton D, McCargar L, Courneya KS. Feasibility and preliminary efficacy of progressive resistance exercise training in lung cancer survivors. *Lung cancer*. 2012 Jan;75(1):126-32. PubMed PMID: 21715041.
- 15  
16 57. McMillan DC, Watson WS, O'Gorman P, Preston T, Scott HR, McArdle CS. Albumin concentrations are primarily determined by the body cell mass and the systemic inflammatory response in cancer patients with weight loss. *Nutrition and cancer*. 2001;39(2):210-3. PubMed PMID: 11759282. Epub 2002/01/05. eng.
- 17  
18 58. Crown AL, Cottle K, Lightman SL, Falk S, Mohamed-Ali V, Armstrong L, et al. What is the role of the insulin-like growth factor system in the pathophysiology of cancer cachexia, and how is it regulated? *Clinical Endocrinology*. 2002;56(6):723-33. PubMed PMID: 2002261382.
- 19  
20 59. Jagoe RT, Redfern CP, Roberts RG, Gibson GJ, Goodship TH. Skeletal muscle mRNA levels for cathepsin B, but not components of the ubiquitin-proteasome pathway, are increased in patients with lung cancer referred for thoracotomy. *Clinical science*. 2002 Mar;102(3):353-61. PubMed PMID: 11869177.
- 21  
22 60. Wieland BM, Stewart GD, Skipworth RJ, Sangster K, Fearon KC, Ross JA, et al. Is there a human homologue to the murine proteolysis-inducing factor? *Clinical cancer research : an official journal of the American Association for Cancer Research*. 2007 Sep 1;13(17):4984-92. PubMed PMID: 17785548. Epub 2007/09/06. eng.
- 23  
24 61. Martinez-Hernandez PL, Hernanz-Macias A, Gomez-Candela C, Grande-Aragon C, Feliu-Batlle J, Castro-Carpeno J, et al. Serum interleukin-15 levels in cancer patients with cachexia. *Oncology reports*. 2012 Oct;28(4):1443-52. PubMed PMID: 22825570. Epub 2012/07/25. eng.
- 25  
26 62. Op den Kamp CM, Langen RC, Snepvangers FJ, de Theije CC, Schellekens JM, Laugs F, et al. Nuclear transcription factor kappa B activation and protein turnover adaptations in skeletal muscle of patients with progressive stages of lung cancer cachexia. *The American journal of clinical nutrition*. 2013 Sep;98(3):738-48. PubMed PMID: 23902785. Epub 2013/08/02. eng.
- 27  
28 63. Harvie MN, Howell A, Thatcher N, Baildam A, Campbell I. Energy balance in patients with advanced NSCLC, metastatic melanoma and metastatic breast cancer receiving chemotherapy--a longitudinal study. *British journal of cancer*. 2005 Feb 28;92(4):673-80. PubMed PMID: 15726121. Pubmed Central PMCID: PMC2361878. Epub 2005/02/24. eng.
- 29  
30 64. Bovio G, Bettaglio R, Bonetti G, Miotti D, Verni P. Evaluation of nutritional status and dietary intake in patients with advanced cancer on palliative care. *Minerva gastroenterologica e dietologica*. 2008 Sep;54(3):243-50. PubMed PMID: 18614973. Epub 2008/07/11. eng.
- 31  
32  
33  
34  
35  
36  
37  
38  
39  
40  
41  
42  
43  
44  
45  
46  
47  
48  
49



- 1  
2  
3  
4  
5  
6  
7  
8  
9  
10  
11  
12  
13  
14  
15  
16  
17  
18  
19  
20  
21  
22  
23  
24  
25  
26  
27  
28  
29  
30  
31  
32  
33  
34  
35  
36  
37  
38  
39  
40  
41  
42  
43  
44  
45  
46  
47  
48  
49
65. Martin L, Birdsell L, Macdonald N, Reiman T, Clandinin MT, McCargar LJ, et al. Cancer cachexia in the age of obesity: skeletal muscle depletion is a powerful prognostic factor, independent of body mass index. *Journal of clinical oncology : official journal of the American Society of Clinical Oncology*. 2013 Apr 20;31(12):1539-47. PubMed PMID: 23530101. Epub 2013/03/27. eng.
66. Prado CM, Sawyer MB, Ghosh S, Lieffers JR, Esfandiari N, Antoun S, et al. Central tenet of cancer cachexia therapy: do patients with advanced cancer have exploitable anabolic potential? *The American journal of clinical nutrition*. 2013 Oct;98(4):1012-9. PubMed PMID: 23966429. Epub 2013/08/24. eng.
67. Hansell DT, Davies JWL, Burns HJG. The relationship between resting energy expenditure and weight loss in benign and malignant disease. *Annals of Surgery*. 1986;203(3):240-5. PubMed PMID: 1986225346.
68. Fredix EWHM, Soeters PB, Wouters EFM, Deerenberg IM, Von Meyenfeldt MF, Saris WHM. Energy balance in relation to cancer cachexia. *Clinical Nutrition*. 1990;9(6):319-24. PubMed PMID: 1991016698.
69. Staal-van den Brekel AJ, Schols AM, Dentener MA, ten Velde GP, Buurman WA, Wouters EF. The effects of treatment with chemotherapy on energy metabolism and inflammatory mediators in small-cell lung carcinoma. *British journal of cancer*. 1997;76(12):1630-5. PubMed PMID: 9413953. Pubmed Central PMCID: PMC2228201. Epub 1997/01/01. eng.
70. Simons JP, Schols AM, Campfield LA, Wouters EF, Saris WH. Plasma concentration of total leptin and human lung-cancer-associated cachexia. *Clinical science*. 1997 Sep;93(3):273-7. PubMed PMID: 9337643.
71. Simons JP, Schols AM, Buurman WA, Wouters EF. Weight loss and low body cell mass in males with lung cancer: relationship with systemic inflammation, acute-phase response, resting energy expenditure, and catabolic and anabolic hormones. *Clinical science*. 1999 Aug;97(2):215-23. PubMed PMID: 10409477.
72. Scott HR, McMillan DC, Watson WS, Milroy R, McArdle CS. Longitudinal study of resting energy expenditure, body cell mass and the inflammatory response in male patients with non-small cell lung cancer. *Lung cancer*. 2001 Jun;32(3):307-12. PubMed PMID: 11390012. Epub 2001/06/08. eng.
73. Jatoi A, Daly BD, Hughes VA, Dallal GE, Kehayias J, Roubenoff R. Do patients with nonmetastatic non-small cell lung cancer demonstrate altered resting energy expenditure? *The Annals of thoracic surgery*. 2001 Aug;72(2):348-51. PubMed PMID: 11515864.
74. Sarhill N, Mahmoud F, Walsh D, Nelson KA, Komurcu S, Davis M, et al. Evaluation of nutritional status in advanced metastatic cancer. *Supportive care in cancer : official journal of the Multinational Association of Supportive Care in Cancer*. 2003 Oct;11(10):652-9. PubMed PMID: 12920623.
75. Bauer JD, Capra S. Nutrition intervention improves outcomes in patients with cancer cachexia receiving chemotherapy--a pilot study. *Supportive care in cancer : official journal of the Multinational Association of Supportive Care in Cancer*. 2005 Apr;13(4):270-4. PubMed PMID: 15583950.
76. Murphy RA, Mourtzakis M, Chu QS, Reiman T, Mazurak VC. Skeletal muscle depletion is associated with reduced plasma (n-3) fatty acids in non-small cell lung cancer patients. *The Journal of nutrition*. 2010 Sep;140(9):1602-6. PubMed PMID: 20631325.
77. Murphy RA, Mourtzakis M, Chu QS, Baracos VE, Reiman T, Mazurak VC. Nutritional intervention with fish oil provides a benefit over standard of care for weight and skeletal muscle mass in patients with nonsmall cell lung cancer receiving chemotherapy. *Cancer*. 2011 Apr 15;117(8):1775-82. PubMed PMID: 21360698.
78. Winter A, MacAdams J, Chevalier S. Normal protein anabolic response to hyperaminoacidemia in insulin-resistant patients with lung cancer cachexia. *Clinical nutrition (Edinburgh, Scotland)*. 2012 Oct;31(5):765-73. PubMed PMID: 22647419. Epub 2012/06/01. eng.

- 1  
2  
3  
4  
5 79. Beijer S, Hupperets PS, van den Borne BE, Eussen SR, van Henten AM, van den Beuken-van Everdingen M, et al. Effect of adenosine 5'-triphosphate  
6 infusions on the nutritional status and survival of preterminal cancer patients. *Anti-cancer drugs*. 2009 Aug;20(7):625-33. PubMed PMID: 19491658.
- 7 80. Khal J, Hine AV, Fearon KC, Dejong CH, Tisdale MJ. Increased expression of proteasome subunits in skeletal muscle of cancer patients with weight  
8 loss. *The international journal of biochemistry & cell biology*. 2005 Oct;37(10):2196-206. PubMed PMID: 16125116. Epub 2005/08/30. eng.
- 9 81. Wang Z, Heshka S, Gallagher D, Boozer CN, Kotler DP, Heymsfield SB. Resting energy expenditure-fat-free mass relationship: new insights provided  
10 by body composition modeling. *American journal of physiology Endocrinology and metabolism*. 2000 Sep;279(3):E539-45. PubMed PMID: 10950820. Epub  
11 2000/08/19. eng.
- 12 82. Vaughan VC, Martin P, Lewandowski PA. Cancer cachexia: impact, mechanisms and emerging treatments. *J Cachexia Sarcopenia Muscle*. 2012 Oct  
13 25. PubMed PMID: 23097000. Epub 2012/10/26. Eng.
- 14 83. Murphy RA, Yeung E, Mazurak VC, Mourtzakis M. Influence of eicosapentaenoic acid supplementation on lean body mass in cancer cachexia. *British  
15 journal of cancer*. 2011 Nov 8;105(10):1469-73. PubMed PMID: 21970879. Pubmed Central PMCID: PMC3242518. Epub 2011/10/06. eng.
- 16 84. McClellan R. Exercise programs for patients with cancer improve physical functioning and quality of life. *Journal of physiotherapy*. 2013  
17 Mar;59(1):57. PubMed PMID: 23419919. Epub 2013/02/20. eng.
- 18 85. Boxer RS, Kenny AM, Dowsett R, Taxel P. The effect of 6 months of androgen deprivation therapy on muscle and fat mass in older men with  
19 localized prostate cancer. *The aging male : the official journal of the International Society for the Study of the Aging Male*. 2005 Sep-Dec;8(3-4):207-12.  
20 PubMed PMID: 16390748. Epub 2006/01/05. eng.
- 21 86. Argiles JM, Busquets S, Felipe A, Lopez-Soriano FJ. Molecular mechanisms involved in muscle wasting in cancer and ageing: cachexia versus  
22 sarcopenia. *The international journal of biochemistry & cell biology*. 2005 May;37(5):1084-104. PubMed PMID: 15743680. Epub 2005/03/04. eng.
- 23 87. Sorensen JB, Klee M, Palshof T, Hansen HH. Performance status assessment in cancer patients. An inter-observer variability study. *British journal of  
24 cancer*. 1993 Apr;67(4):773-5. PubMed PMID: 8471434. Pubmed Central PMCID: PMC1968363. Epub 1993/04/01. eng.
- 25 88. Montoya M, Fossella F, Palmer JL, Kaur G, Pace EA, Yadav R, et al. Objective evaluation of physical function in patients with advanced lung cancer: a  
26 preliminary report. *Journal of palliative medicine*. 2006 Apr;9(2):309-16. PubMed PMID: 16629561. Epub 2006/04/25. eng.
- 27 89. May CH, Lester JF, Lee S. Performance status discordance and why it matters. *Lung cancer*. 2012;75(S1):S1-S72.
- 28 90. Sonpavde G, Vogelzang NJ, Galsky MD, Raghavan VA, Daniel S. Objective measures of physical functional capacity warrant exploration to  
29 complement or replace the subjective physician estimated performance status. *American journal of clinical oncology*. 2012 Apr;35(2):163-6. PubMed PMID:  
30 22433994. Epub 2012/03/22. eng.
- 31 91. Temel JS, Greer JA, Muzikansky A, Gallagher ER, Admane S, Jackson VA, et al. Early palliative care for patients with metastatic non-small-cell lung  
32 cancer. *The New England journal of medicine*. 2010 Aug 19;363(8):733-42. PubMed PMID: 20818875. Epub 2010/09/08. eng.
- 33  
34  
35  
36  
37  
38  
39  
40  
41  
42  
43  
44  
45  
46  
47  
48  
49

1  
2  
3  
4  
5  
6  
7  
8  
9  
10  
11  
12  
13  
14  
15  
16  
17  
18  
19  
20  
21  
22  
23  
24  
25  
26  
27  
28  
29  
30  
31  
32  
33  
34  
35  
36  
37  
38  
39  
40  
41  
42  
43  
44  
45  
46  
47  
48  
49  
50  
51  
52  
53  
54  
55  
56  
57  
58  
59  
60

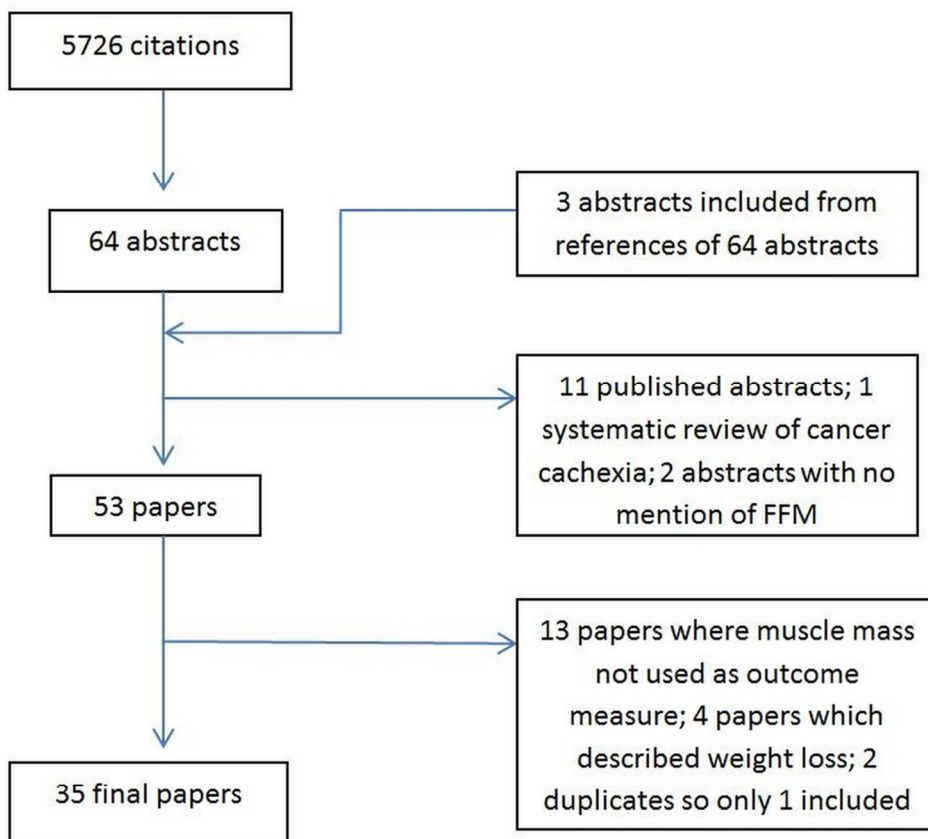

99x90mm (300 x 300 DPI)

only

## Research Checklist for Systematic Review manuscript for BMJ Open

### PRISMA statement

From Moher D et al. *BMJ* 2009; 339:b2535

Checklist of items to include when reporting a systematic review or meta-analysis

| Section/topic             | Item No | Checklist item                                                                                                                                                                                                                                                                                         | Reported on page No |
|---------------------------|---------|--------------------------------------------------------------------------------------------------------------------------------------------------------------------------------------------------------------------------------------------------------------------------------------------------------|---------------------|
| <b>Title</b>              |         |                                                                                                                                                                                                                                                                                                        |                     |
| Title                     | 1       | Identify the report as a systematic review, meta-analysis, or both                                                                                                                                                                                                                                     | 1                   |
| <b>Abstract</b>           |         |                                                                                                                                                                                                                                                                                                        |                     |
| Structured summary        | 2       | Provide a structured summary including, as applicable, background, objectives, data sources, study eligibility criteria, participants, interventions, study appraisal and synthesis methods, results, limitations, conclusions and implications of key findings, systematic review registration number | 1-3                 |
| <b>Introduction</b>       |         |                                                                                                                                                                                                                                                                                                        |                     |
| Rationale                 | 3       | Describe the rationale for the review in the context of what is already known                                                                                                                                                                                                                          | 7                   |
| Objectives                | 4       | Provide an explicit statement of questions being addressed with reference to participants, interventions, comparisons, outcomes, and study design (PICOS)                                                                                                                                              | 8                   |
| <b>Methods</b>            |         |                                                                                                                                                                                                                                                                                                        |                     |
| Protocol and registration | 5       | Indicate if a review protocol exists, if and where it can be accessed (such as web address), and, if available, provide registration information including registration number                                                                                                                         | N/A                 |
| Eligibility criteria      | 6       | Specify study characteristics (such as PICOS, length of follow-up) and report characteristics (such as years considered, language, publication status) used as criteria for eligibility, giving rationale                                                                                              | 11-13               |
| Information sources       | 7       | Describe all information sources (such as databases with dates of coverage, contact with study authors to identify additional studies) in the search and date last searched                                                                                                                            | 11-12               |
| Search                    | 8       | Present full electronic search strategy for at least one database, including any limits used, such that it could be repeated                                                                                                                                                                           | 12                  |
| Study selection           | 9       | State the process for selecting studies (that is, screening, eligibility, included in systematic review, and, if applicable, included in the meta-analysis)                                                                                                                                            | 13, Figure 1        |
| Data collection process   | 10      | Describe method of data extraction from reports (such as piloted forms, independently, in duplicate) and any processes for obtaining and confirming data from                                                                                                                                          | 13                  |

| Section/topic                      | Item No | Checklist item                                                                                                                                                                                                        | Reported on page No         |
|------------------------------------|---------|-----------------------------------------------------------------------------------------------------------------------------------------------------------------------------------------------------------------------|-----------------------------|
|                                    |         | investigators                                                                                                                                                                                                         |                             |
| Data items                         | 11      | List and define all variables for which data were sought (such as PICOS, funding sources) and any assumptions and simplifications made                                                                                | 13                          |
| Risk of bias in individual studies | 12      | Describe methods used for assessing risk of bias of individual studies (including specification of whether this was done at the study or outcome level), and how this information is to be used in any data synthesis | See notes below             |
| Summary measures                   | 13      | State the principal summary measures (such as risk ratio, difference in means).                                                                                                                                       | See notes below             |
| Synthesis of results               | 14      | Describe the methods of handling data and combining results of studies, if done, including measures of consistency (such as $I^2$ statistic) for each meta-analysis                                                   | See notes below             |
| Risk of bias across studies        | 15      | Specify any assessment of risk of bias that may affect the cumulative evidence (such as publication bias, selective reporting within studies)                                                                         | See notes below             |
| Additional analyses                | 16      | Describe methods of additional analyses (such as sensitivity or subgroup analyses, meta-regression), if done, indicating which were pre-specified                                                                     | See notes below             |
| <b>Results</b>                     |         |                                                                                                                                                                                                                       |                             |
| Study selection                    | 17      | Give numbers of studies screened, assessed for eligibility, and included in the review, with reasons for exclusions at each stage, ideally with a flow diagram                                                        | Figure 1                    |
| Study characteristics              | 18      | For each study, present characteristics for which data were extracted (such as study size, PICOS, follow-up period) and provide the citations                                                                         | Table 2-3                   |
| Risk of bias within studies        | 19      | Present data on risk of bias of each study and, if available, any outcome-level assessment (see item 12).                                                                                                             | See notes below ref item 12 |
| Results of individual studies      | 20      | For all outcomes considered (benefits or harms), present for each study (a) simple summary data for each intervention group and (b) effect estimates and confidence intervals, ideally with a forest plot             | Tables 2 and 3; pages 16-34 |
| Synthesis of results               | 21      | Present results of each meta-analysis done, including confidence intervals and measures of consistency                                                                                                                | N/A                         |
| Risk of bias across studies        | 22      | Present results of any assessment of risk of bias across studies (see item 15)                                                                                                                                        | N/A                         |
| Additional analysis                | 23      | Give results of additional analyses, if done (such as sensitivity or subgroup analyses, meta-regression) (see item 16)                                                                                                | N/A                         |
| <b>Discussion</b>                  |         |                                                                                                                                                                                                                       |                             |
| Summary of evidence                | 24      | Summarise the main findings including the strength of evidence for each main outcome; consider their relevance to key groups (such as health care providers, users, and policy makers)                                | 35-39                       |
| Limitations                        | 25      | Discuss limitations at study and outcome level (such as risk                                                                                                                                                          | 38                          |

| Section/topic  | Item No | Checklist item                                                                                                                                 | Reported on page No |
|----------------|---------|------------------------------------------------------------------------------------------------------------------------------------------------|---------------------|
|                |         | of bias), and at review level (such as incomplete retrieval of identified research, reporting bias)                                            |                     |
| Conclusions    | 26      | Provide a general interpretation of the results in the context of other evidence, and implications for future research                         | 38-39               |
| <b>Funding</b> |         |                                                                                                                                                |                     |
| Funding        | 27      | Describe sources of funding for the systematic review and other support (such as supply of data) and role of funders for the systematic review | N/A                 |

## NOTES

- With reference to item 12, we have tried to account for individual study bias by reporting study sample size and power calculations where reported.
- With reference to items 13, 14 and 16, as this is a systematic review rather than a meta-analysis, this was not performed.
- With reference to item 15, we have not accounted for publication bias. With regards to selective reporting within studies, this was not possible to be performed in great detail but we paid particular attention to the individual reporting of participant numbers, and whether the authors accounted for the number of those not completing the study.
- With reference to item 27, we received no external funding for this systematic review.
